# Supplementary material for: Highly efficient three-component coupling reaction catalyzed by gold nanoparticles supported on periodic mesoporous organosilica with ionic liquid framework
Source: Royal Society of Chemistry journal article supplement (doi:10.1039/c2cc33320a), 2012-01-01

# Highly Efficient Three-Component Coupling Reaction Catalyzed by Gold Nanoparticles Supported on Periodic Mesoporous Organosilica with Ionic Liquid Framework

Babak Karimi,\* Mohammad Gholinejad\* and Mojtaba Khorasani  
*E-mail:* [karimi@iasbs.ac.ir](mailto:karimi@iasbs.ac.ir) and [gholinejad@iasbs.ac.ir](mailto:gholinejad@iasbs.ac.ir)

Department of Chemistry, Institute for Advanced Studies in Basic Sciences (IASBS),  
P.O. Box 45195-1159, GavaZang, Zanjan, Iran

## Table of Contents

|                                                                                              |            |
|----------------------------------------------------------------------------------------------|------------|
| <b>1. Experimental Section</b>                                                               | <b>S3</b>  |
| 1.1. General                                                                                 | S3         |
| 1.2. Synthesis of ionic liquid precursor                                                     | S3         |
| 1.3. Synthesis of PMO containing ionic liquid, PMO-IL                                        | S3         |
| 1.4. Preparation of Au@PMO-IL catalyst                                                       | S4         |
| 1.5. General procedure for three-component coupling reaction of aldehyde, alkynes and amines | S4         |
| 1.6. Typical procedure for recycling of catalyst                                             | S4         |
| <b>2. Characterizations of catalyst</b>                                                      | <b>S5</b>  |
| 2.1. FT-IR spectrum for PMO-IL and Au@PMO-IL (Fig 1S)                                        | S5         |
| 2.2. Nitrogen adsorption-desorption isotherms (Fig. 2S)                                      | S6         |
| 2.3. TEM images                                                                              | S7         |
| 2.4. X-Ray photoelectron spectroscopy (XPS) spectra                                          | S8         |
| <b>3. Characterizations of products</b>                                                      | <b>S9</b>  |
| <b>4. Copy of original<sup>1</sup>H NMR and<sup>13</sup>C NMR of products</b>                | <b>S15</b> |

## 1. Experimental Section

### 1.1. General

Sodium tetrachloro Aureate dihydrate ( $\text{NaAuCl}_4 \cdot 2\text{H}_2\text{O}$ ), Sodium Hydride 95%, Pluronic P123 ( $\text{EO}_{20}\text{PO}_{70}\text{EO}_{20}$ ) and tetramethoxyorthosilicate (TMOS) were obtained from Aldrich. Imidazole and 3-chloropropyl-trimethoxysilan were purchased from Merck. Imidazole was crystallized in distilled  $\text{CH}_2\text{Cl}_2$  and dried in desiccator under vacuum for 3 days before use.

### 1.2. Synthesis of ionic liquid precursor

The ionic liquid precursor was prepared using our last synthetic report with slightly modification<sup>1,2</sup>. In a typical experiment, a suspension of sodium imidazolide in dry THF was prepared from reaction between dried imidazole (2 g) and NaH 95% (0.77 g) at a flame-dried two necks flask containing dry THF (60 ml) under argon atmosphere. 3-chloropropyl-trimethoxysilan (5.4 ml) was added to the mentioned stirred suspension and was refluxed for 30h. Then the reaction mixture is cooled to room temperature and the solvent removed by reduced pressure until the oil containing NaCl obtained. Then 3-chloropropyl-trimethoxysilan (5.4 ml) and dry toluene (60 ml) was added and refluxed for 48h. After cooling the reaction mixture to room temperature, toluene phase was separated by a clean syringe. Dry  $\text{CH}_2\text{Cl}_2$  was added for removal of precipitated NaCl. Then,  $\text{CH}_2\text{Cl}_2$  phase was transferred to another well-dried two necks flask.  $\text{CH}_2\text{Cl}_2$  was removed by reduced pressure until ionic liquid and unreacted starting materials obtained. Finally, ionic liquid was washed by dry toluene for removal of starting materials.

### 1.3. Synthesis of PMO containing ionic liquid, PMO-IL

PMO-IL was synthesized according to our last methods, too.<sup>1,2</sup> For a typical synthesis, a molar ratio 0.013 P123: 26.515  $\text{H}_2\text{O}$ : 5.300 KCl: 4.200 HCl: 1.000 Si was used. The first, Pluronic P123 (1.67g) was dissolved in a mixture of  $\text{H}_2\text{O}$  (10.5g) and HCl, (2M, 46.14g). Then KCl (8.8 g) was added and system stirred until a homogenous solution obtained. A

pre-mixture of ionic liquid (0.86 g) and tetramethoxyorthosilicate (2.74g) in dry methanol was added to mentioned solution and stirred at 40 °C for 24 h. The resulting mixture was aged without stirring at 100 °C for 72h. The obtained PMO with surfactant was filtered and washed with deionized water, and dried at room temperature. The surfactant was extracted from the PMO-IL by a Soxhlet apparatus by using ethanol (100 ml) and *c*-HCl (3 ml). In a typical extraction, as synthesized PMO (1g) washed four times with acidic ethanols over 12 h.

#### **1.4. Preparation of Au@PMO-IL catalyst**

Au@PMO-IL was prepared based on simple ion exchange technique according to literature procedure.<sup>3</sup> For atypical method, PMO-IL (0.5g, 1.0 mmol IL g<sup>-1</sup>) was added to 10 ml of deionized water and sonicated for at least 10 min. NaAuCl<sub>4</sub> · 2H<sub>2</sub>O (0.034 g, 0.085 mmol) as Au precursor dissolved in 3 ml of deionized water and gradually was added to mentioned suspension and stirred at room temperature for 5 h. The resulted system was filtered and washed with deionized water (3×10 ml) and acetone (2×10 ml) respectively. The resulted yellow solid which is Au@PMO-IL dried at room temperature under vacuity. Loading of Au catalyst was determined 0.16 mmol Au g<sup>-1</sup> by atomic absorption spectroscopy (AAS).

#### **1.5. General procedure for three-component coupling reaction of aldehyde, alkynes and amines**

Au@PMO-IL (12 mg) was added to the mixture of aldehyde (1mmol), amine (1.2 mmol) and Alkyne (1.3mmol) in 5 ml CHCl<sub>3</sub>. The reaction mixture was stirred for appropriate reaction time at room temperature. After completion of reaction, CHCl<sub>3</sub> was evaporated and crude product was purified using column chromatography on silica gel (EtOAc/*n*-hexane).

#### **1.6. Typical procedure for recycling of catalyst**

After completion of the reaction of *p*-tolualdehyde (1mmo) with phenyl acetylene (1.3 mmol) and piperidine (1.2 mmol), reaction mixture was centrifuged and solid

catalyst was washed with diethyl ether (2×5 mL), dried and reused for the similar reaction.

## Reference

- [1] Karimi, B.; Elhamifar, D.; Clark, J. H.; Hunt, A. J. *Chem. Eur. J.* **2010**, *16*, 8047-8053
- [2] Karimi, B.; Elhamifar, D.; Clark, J. H.; Hunt, A. J. *Org. Biomol. Chem.* **2011**, *9*, 7420-7426.
- [3] Karimi, B.; Ghoreishi-Nezhad, M.; Clark, J. H. *Org. Lett.* **2005**, *7*, 625-628

## 2. Characterizations of catalyst

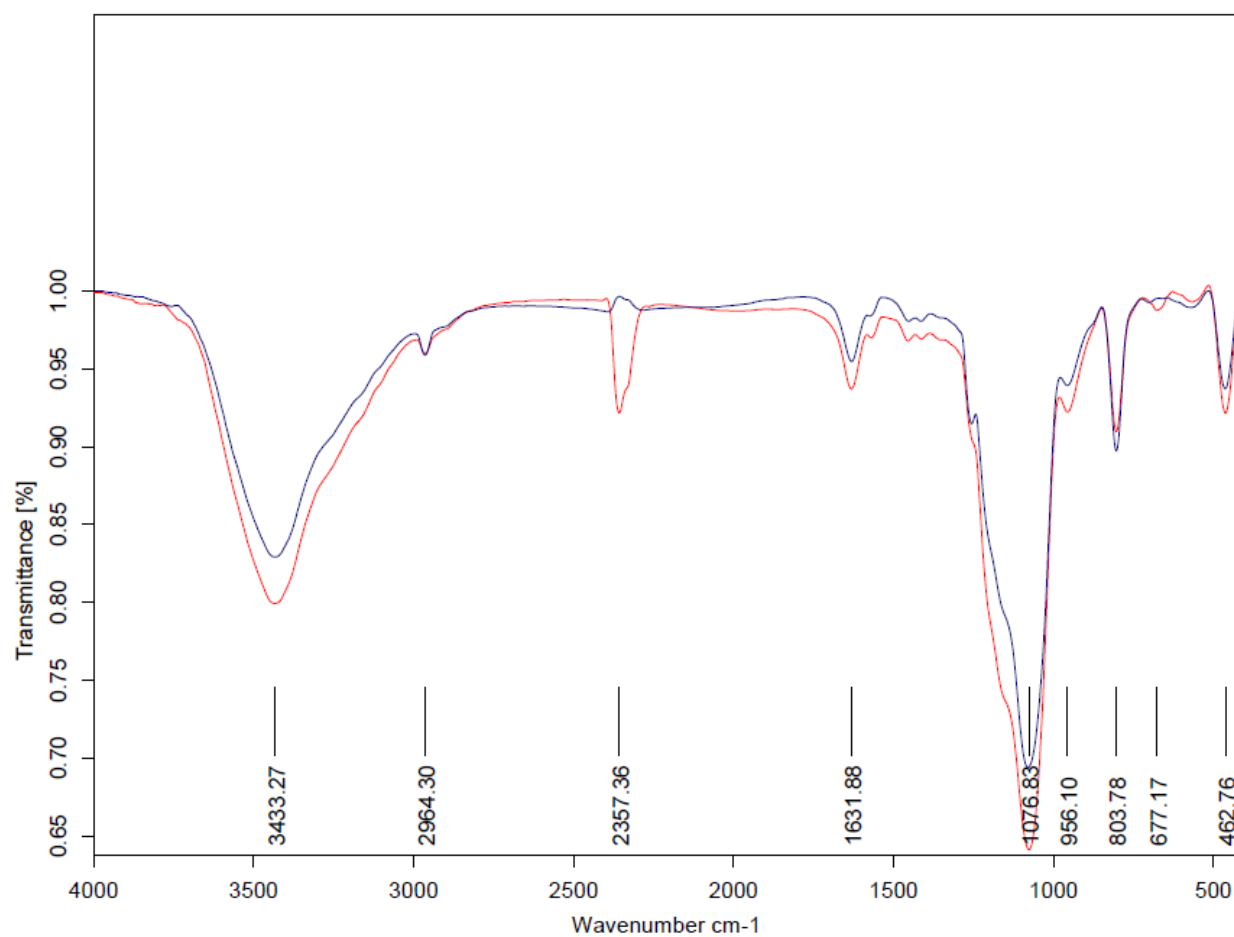

Fig. 1S. FT-IR spectrum for PMO-IL (blue) and Au@PMO-IL (red)

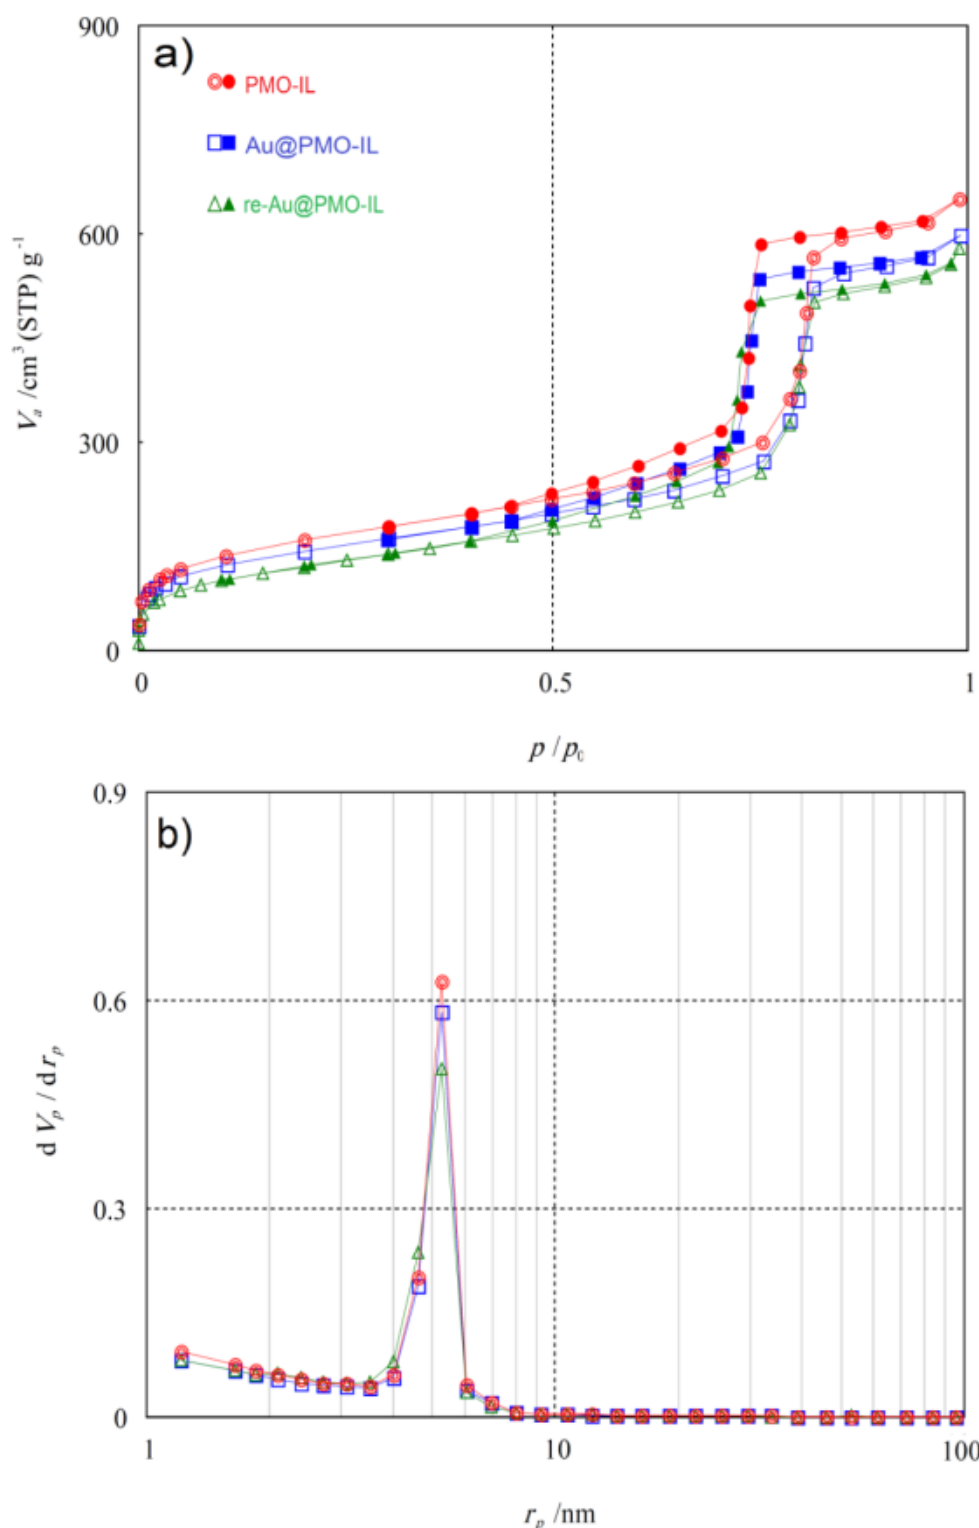

Fig.2S. Nitrogen adsorption-desorption isotherms (a) and pore size distributions (b) of the PMO-IL , Au@PMO-IL and recovered catalyst ( re-Au@PMO-IL) after 3<sup>rd</sup> reaction cycle

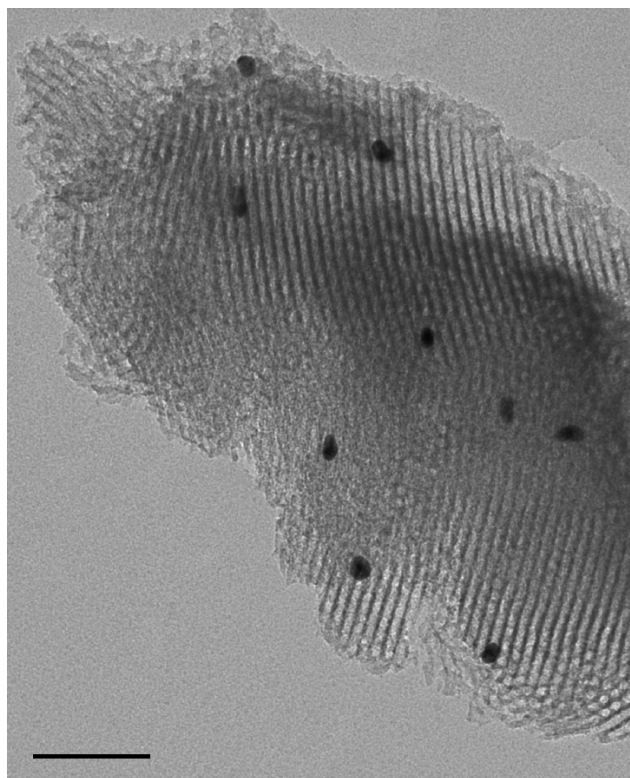

**Fig. 3S.** TEM image of the fresh Au@PMO-IL

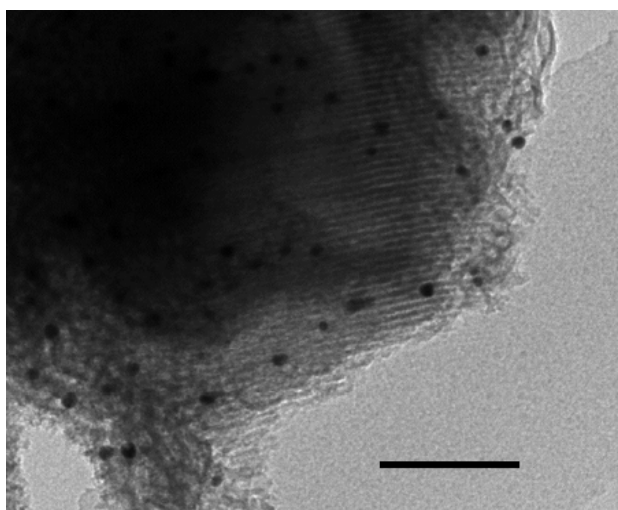

**Fig. 4S.** TEM image of the recovered Au@PMO-IL

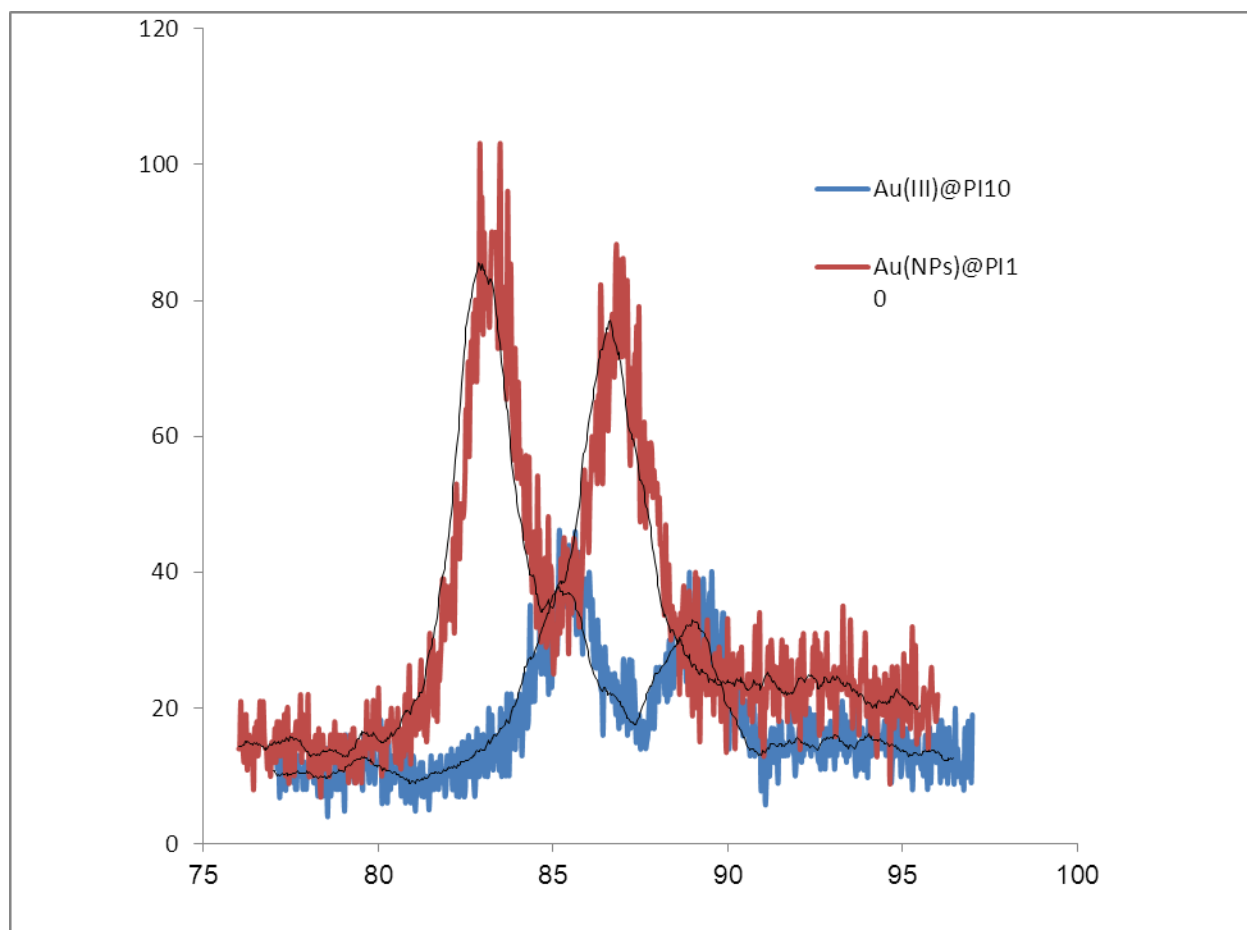

**Fig. 5S.** XPS spectra for Au@PMO-IL (our active catalyst) and the reduced catalyst Au(0)@PMO-IL (Inactive catalyst)



## 2. Characterizations of products

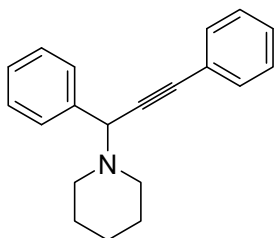

**1-(1,3-diphenylprop-2-ynyl) piperidine (table 2, entry 1):**  $^1\text{H}$  NMR (400 MHz,  $\text{CDCl}_3$ , ppm):  $\delta$  7.70 (d,  $J=7.6$  Hz, 2H), 7.58-7.56 (m, 2H), 7.43-7.32 (m, 6H), 4.86 (s, 1H), 2.64-2.612 (m, 4H), 1.69-1.62 (m, 4H), 1.51-1.48 (m, 2H);  $^{13}\text{C}$  NMR (400 MHz,  $\text{CDCl}_3$ ) ppm 138.6, 131.8, 128.5, 128.3, 128.1, 128.0, 127.4, 123.3, 87.9, 86.1, 62.4, 50.5, 26.2, 24.4

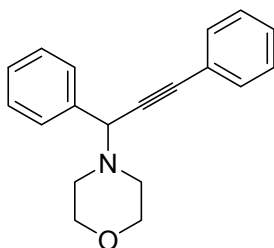

**4-(1,3-diphenylprop-2-ynyl)morpholine (table 2, entry 2):**  $^1\text{H}$  NMR (400 MHz,  $\text{CDCl}_3$ , ppm):  $\delta$  7.67 (d,  $J=7.2$  Hz, 2H), 7.56-7.54 (m, 2H), 7.42-7.32 (m, 6H), 4.83 (s, 1H), 3.87-3.73 (m, 4H), 2.67 (br, 4H);  $^{13}\text{C}$  NMR (400 MHz,  $\text{CDCl}_3$ ) ppm 137.8, 131.8, 129.7, 128.6, 128.3, 128.2, 128.2, 127.8, 122.9, 88.5, 88.0, 67.1, 62.0, 49.8.

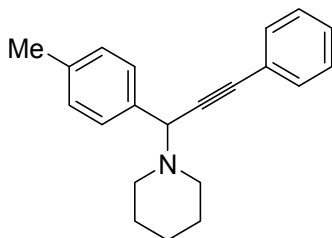

**1-(3-phenyl-1-p-tolylprop-2-ynyl) piperidine (table 2, entry 3):**  $^1\text{H}$  NMR (400 MHz,  $\text{CDCl}_3$ , ppm):  $\delta$  7.58 (d,  $J=8$  Hz, 2H), 7.58 (br, 2H), 7.40-7.37 (m, 3H), 7.23 (d,  $J=8$  Hz, 2H), 4.81 (s, 1H), 2.64-2.63 (m, 4H), 2.42 (s, 3H), 1.69-1.62 (m, 4H), 1.51-1.49 (m, 2H);  $^{13}\text{C}$  NMR (400 MHz,  $\text{CDCl}_3$ ) ppm 137.1, 135.6, 131.8, 128.8, 128.5, 128.3, 128.0, 123.4, 87.6, 86.4, 62.1, 50.7, 26.2, 24.5, 21.1.

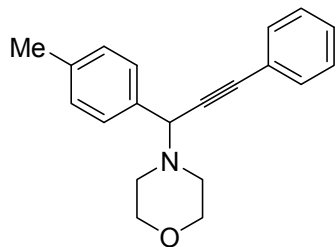

**4-(3-phenyl-1-p-tolylprop-2-ynyl)morpholine (table 2, entry 4):**  $^1\text{H}$  NMR (400 MHz,  $\text{CDCl}_3$ , ppm):  $\delta$  7.60 (br, 2H), 7.59 (d,  $J=8$  Hz, 2H), 7.40-7.39 (m, 3H), 7.25 (d,  $J=8$  Hz, 2H), 4.83 (s, 1H), 3.84-3.79 (m, 4H), 2.75-2.67 (m, 4H), 2.43 (s, 3H);  $^{13}\text{C}$  NMR (400 MHz,  $\text{CDCl}_3$ ) ppm 137.5, 134.9, 131.8, 129.0, 128.6, 128.3, 128.2, 123.1, 88.3, 86.4, 67.2, 61.8, 49.9, 21.2.

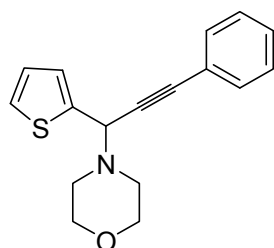

**4-(3-phenyl-1-(thiophen-2-yl)prop-2-ynyl)morpholine (table 2, entry 5):**  $^1\text{H}$  NMR (400 MHz,  $\text{CDCl}_3$ , ppm):  $\delta$  7.575-7.54 (m, 2H), 7.38-7.37 (m, 3H), 7.33 (d,  $J=5.2$  Hz, 1H), 7.28 (d,  $J=5.2$  Hz, 1H), 7.01 (dd,  $J_1=J_2=5.2$  Hz, 1H), 5.04 (s, 1H), 3.84-3.75 (m, 4H), 2.78-2.67 (m, 4H);  $^{13}\text{C}$  NMR (400 MHz,  $\text{CDCl}_3$ ) ppm 142.8, 131.8, 128.4, 128.3, 126.4, 126.3, 125.8, 122.6, 87.6, 84.2, 67.1, 57.8, 49.6.

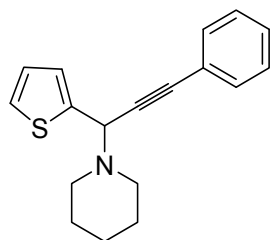

**1-(3-phenyl-1-(thiophen-2-yl)prop-2-ynyl)piperidine (table 2, entry 6):**  $^1\text{H}$  NMR (400 MHz,  $\text{CDCl}_3$ , ppm):  $\delta$  7.56 (m, 2H), 7.38-7.37 (m, 3H), 7.33 (d,  $J=4.8$  Hz, 1H), 7.27 (m, 1H), 7.01 (dd,  $J_1=J_2=3.6$  Hz, 1H), 5.04 (s, 1H), 2.71-2.64 (m, 4H), 1.73-1.62 (m, 4H), 1.52-1.49 (m, 2H);  $^{13}\text{C}$  NMR (400 MHz,  $\text{CDCl}_3$ ) ppm 144.0, 131.9, 128.3, 128.2, 126.2, 125.8, 125.4, 123.0, 86.9, 85.3, 58.2, 50.6, 26.2, 24.4.

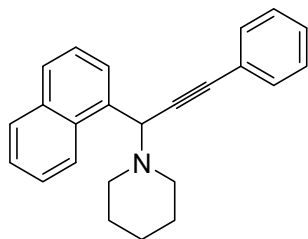

**1-(1-(naphthalen-1-yl)-3-phenylprop-2-ynyl)piperidine (table 2, entry 7):**  $^1\text{H}$  NMR (400 MHz,  $\text{CDCl}_3$ , ppm):  $\delta$  8.58 (d,  $J = 8.4$  Hz, 1H), 8.11 (d,  $J = 7.2$  Hz, 1H), 7.99 (d,  $J = 8$  Hz, 1H), 7.94 (d,  $J = 8.4$  Hz, 1H), 7.73-7.58 (m, 5H), 7.49-7.46 (m, 3H), 5.60 (s, 1H), 2.82-2.80 (m, 4H), 1.74-1.39 (m, 6H);  $^{13}\text{C}$  NMR (400 MHz,  $\text{CDCl}_3$ ) ppm 134.3, 134.2, 132.1, 131.9, 128.7, 128.5, 128.4, 128.2, 127.0, 125.9, 125.7, 125.1, 124.9, 123.1, 88.7, 86.0, 60.6, 50.8, 26.4, 24.7.

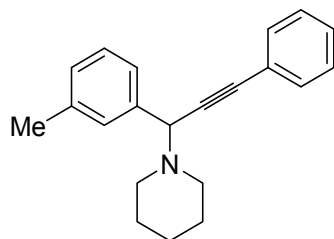

**1-(3-phenyl-1-m-tolylprop-2-ynyl)piperidine (table 2, entry 8):**  $^1\text{H}$  NMR (400 MHz,  $\text{CDCl}_3$ , ppm):  $\delta$  7.63-7.61 (m, 2H), 7.53 (br, 2H), 7.43-7.40 (m, 3H), 7.35 (t,  $J = 7.6$  Hz, 1H), 7.20 (d,  $J = 7.6$  Hz), 4.85 (s, 1H), 2.69-2.66 (m, 4H), 2.48 (s, 3H), 1.72-1.68 (m, 4H), 1.56-1.37 (m, 2H);  $^{13}\text{C}$  NMR (400 MHz,  $\text{CDCl}_3$ ) ppm 138.6, 137.7, 131.9, 129.3, 128.3, 128.3, 128.0, 128.0, 125.7, 123.5, 87.7, 86.4, 62.5, 50.8, 26.2, 24.5, 21.6.

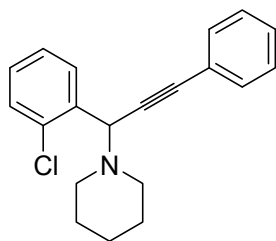

**1-(1-(2-chlorophenyl)-3-phenylprop-2-ynyl)piperidine (table 2, entry 9):**  $^1\text{H}$  NMR (400 MHz,  $\text{CDCl}_3$ , ppm):  $\delta$  7.81 (dd,  $J = 7.2, 1.6$  Hz, 1H), 7.55 (dd,  $J = 7.6, 7.2$  Hz, 2H), 7.42 (dd,  $J = 7.6, 1.2$  Hz, 1H), 7.37-7.27 (m, 5H), 5.17 (s, 1H), 2.66 (br, 4H), 1.68-1.58 (m, 4H), 1.51-1.46 (m, 2H);  $^{13}\text{C}$  NMR (400 MHz,  $\text{CDCl}_3$ ) ppm 136.4, 134.7, 131.8, 130.6, 129.8, 128.8, 128.3, 128.1, 126.2, 123.2, 87.7, 85.8, 59.3, 50.8, 26.2, 24.5.

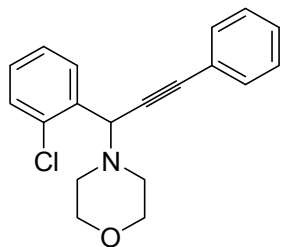

**4-(1-(2-chlorophenyl)-3-phenylprop-2-ynyl)morpholine (table 2, entry 10):**  $^1\text{H}$  NMR (400 MHz,  $\text{CDCl}_3$ , ppm):  $\delta$  7.21 (dd,  $J=7.6$ , 2 Hz, 1H), 7.56-7.55 (m, 2H), 7.45 (d,  $J=7.2$  Hz, 1H), 7.38-7.27 (m, 5H), 5.19 (s, 1H), 3.79-3.72 (m, 4H), 2.73 (t,  $J=4.4$  Hz, 4H);  $^{13}\text{C}$  NMR (400 MHz,  $\text{CDCl}_3$ ) ppm 135.6, 134.7, 131.8, 130.5, 129.9, 129.1, 128.4, 128.3, 126.4, 122.8, 88.4, 84.7, 67.1, 58.9, 49.8.

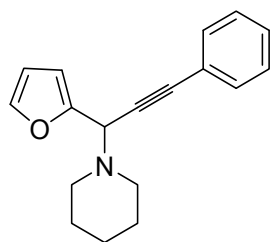

**1-(1-(furan-2-yl)-3-phenylprop-2-ynyl)piperidine (table 2, entry 11):**  $^1\text{H}$  NMR (400 MHz,  $\text{CDCl}_3$ , ppm):  $\delta$  7.54-7.52 (m, 2H), 7.46 (br, 1H), 7.36-7.35 (m, 3H), 6.51 (d,  $J=2.8$  Hz, 1H), 6.38 (d,  $J=2$  Hz, 1H), 4.91 (s, 1H), 3.85-3.76 (m, 4H), 2.62-2.60 (m, 4H), 1.71-1.60 (m, 4H), 1.49-1.46 (m, 2H);  $^{13}\text{C}$  NMR (400 MHz,  $\text{CDCl}_3$ ) ppm 151.6, 142.5, 131.8, 128.3, 128.2, 122.9, 109.9, 109.2, 86.4, 83.8, 56.5, 50.5, 25.9, 24.3.

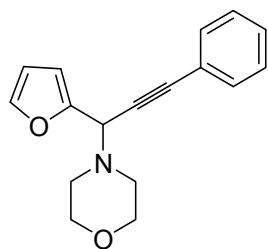

**4-(1-(furan-2-yl)-3-phenylprop-2-ynyl)morpholine (table 2, entry 12):**  $^1\text{H}$  NMR (400 MHz,  $\text{CDCl}_3$ , ppm):  $\delta$  7.54-7.51 (m, 2H), 7.43 (br, 1H), 7.37-7.36 (m, 3H), 6.54 (d,  $J=2.8$  Hz, 1H), 6.40-6.38 (m, 1H), 4.91 (s, 1H), 3.85-3.76 (m, 4H), 2.73-2.66 (m, 4H);  $^{13}\text{C}$  NMR (400 MHz,  $\text{CDCl}_3$ ) ppm 150.7, 142.9, 131.8, 128.5, 128.3, 122.5, 110.1, 109.7, 87.0, 82.8, 66.9, 56.1, 49.6.

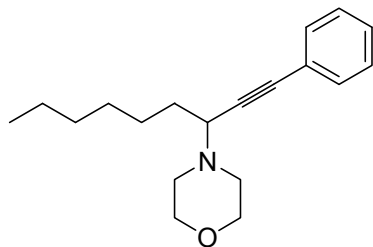

**4-(1-phenylnon-1-yn-3-yl)morpholine (table 2, entry 13):**  $^1\text{H}$  NMR (400 MHz,  $\text{CDCl}_3$ , ppm):  $\delta$  7.47 (br, 5H), 7.32 (br, 3H), 3.79 (br, 4H), 3.52 (t,  $J=7.2$  Hz, 1H), 2.77 (br, 2H), 2.61 (br, 2H), 1.75-1.73 (m, 2H), 1.58-1.51 (m, 2H), 1.35-1.30 (m, 6H), 0.93 (br, 3H);  $^{13}\text{C}$  NMR (400 MHz,  $\text{CDCl}_3$ ) ppm 131.7, 128.2, 127.9, 123.2, 87.2, 86.1, 67.1, 58.1, 49.7, 32.9, 31.7, 29.0, 26.6, 22.6, 14.1.

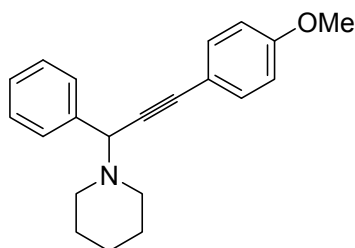

**1-(3-(4-methoxyphenyl)-1-phenylprop-2-ynyl) piperidine (table 2, entry 14):**  $^1\text{H}$  NMR (400 MHz,  $\text{CDCl}_3$ , ppm):  $\delta$  7.67 (d,  $J=7.6$ , 2H), 7.49 (d,  $J=8.8$  Hz, 2H), 7.39 (dd,  $J_1=J_2=7.6$  Hz, 2H), 7.32 ( $J_1=J_2=7.6$  Hz, 1H), 6.89 (d,  $J=8.8$  Hz, 2H), 4.81 (s, 1H), 3.85 (s, 3H), 2.59 (br, 4H), 1.66-1.60 (m, 4H), 1.49-1.47 (m, 2H);  $^{13}\text{C}$  NMR (400 MHz,  $\text{CDCl}_3$ ) ppm 159.4, 138.8, 133.2, 128.4, 128.2, 127.0, 115.5, 113.9, 87.6, 84.5, 62.4, 55.3, 50.7, 26.2, 24.4.

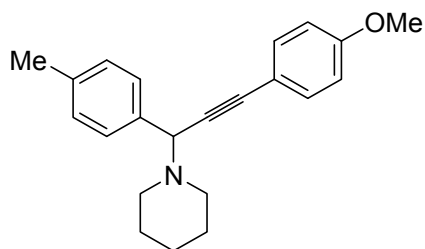

**1-(3-(4-methoxyphenyl)-1-p-tolylprop-2-ynyl)piperidine (table 2, entry 15):**  $^1\text{H}$  NMR (400 MHz,  $\text{CDCl}_3$ , ppm):  $\delta$  7.58 (d,  $J=8$  Hz, 2H), 7.52 (d,  $J=8.8$  Hz, 2H), 7.23 (d,  $J=8$  Hz, 2H), 6.91 (d,  $J=8.8$  Hz, 2H), 4.80 (s, 1H), 3.86 (s, 3H), 2.63 (br, 4H), 2.42 (s, 3H), 1.68-1.64 (m, 4H), 1.52-1.50 (m, 2H);  $^{13}\text{C}$  NMR (400 MHz,  $\text{CDCl}_3$ ) ppm 159.4, 137.0, 135.8, 133.2, 128.7, 128.5, 115.6, 113.9, 87.4, 84.9, 62.2, 55.3, 50.7, 26.2, 24.5, 21.1.

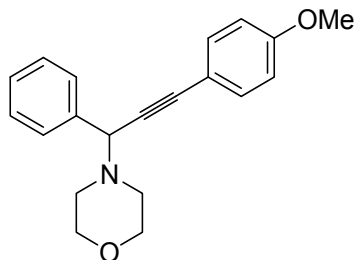

**4-(3-(4-methoxyphenyl)-1-phenylprop-2-ynyl)morpholine (table 2, entry 16):**  $^1\text{H}$  NMR (400 MHz,  $\text{CDCl}_3$ , ppm):  $\delta$  7.677 (d,  $J=7.6$  Hz, 2H), 7.49 (d,  $J=8.8$  Hz, 2H), 7.41 (dd,  $J_1=J_2=7.6$  Hz, 2H), 7.35 (dd,  $J_1=J_2=7.2$  Hz, 1H), 6.90 (d,  $J=8.8$  Hz, 2H), 4.81 (s, 1H), 3.85 (s, 3H), 3.79-3.76 (m, 4H), 2.67 (br, 4H);  $^{13}\text{C}$  NMR (400 MHz,  $\text{CDCl}_3$ ) ppm 159.6, 138.0, 133.2, 128.6, 128.2, 127.7, 115.1, 113.9, 88.3, 83.5, 67.2, 62.1, 55.3, 49.9.

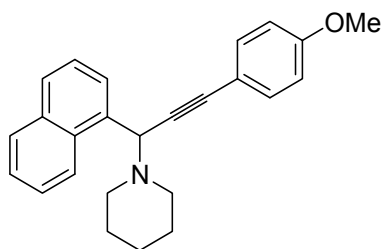

**1-(3-(4-methoxyphenyl)-1-(naphthalen-1-yl)prop-2-ynyl)piperidine (table 2, entry 17):**  $^1\text{H}$  NMR (400 MHz,  $\text{CDCl}_3$ , ppm):  $\delta$  8.52 (d,  $J=8.4$  Hz, 1H), 8.04 (d,  $J=7.6$  Hz, 1H), 7.93 (d,  $J=7.6$  Hz, 1H), 7.88 (d,  $J=8.4$  Hz, 1H), 7.62-7.52 (m, 5H), 6.94 (d,  $J=8.8$  Hz, 2H), 5.52 (s, 1H), 3.86 (s, 3H), 2.74-2.73 (m, 4H), 1.66-1.37 (m, 6H);  $^{13}\text{C}$  NMR (400 MHz,  $\text{CDCl}_3$ ) ppm 159.5, 134.5, 134.1, 133.2, 132.0, 128.5, 128.4, 126.9, 125.8, 125.6, 125.1, 124.8, 115.6, 114.0, 88.4, 84.4, 60.6, 55.3, 50.8, 26.3, 24.7.

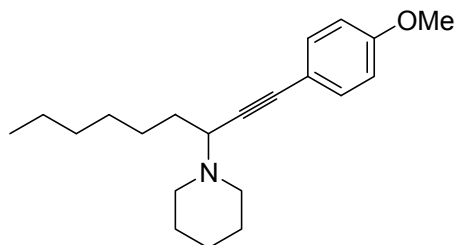

**1-(1-(4-methoxyphenyl)non-1-yn-3-yl)piperidine (table 2, entry 18):**  $^1\text{H}$  NMR (400 MHz,  $\text{CDCl}_3$ , ppm):  $\delta$  7.38 (d,  $J=8.4$  Hz, 2H), 6.82 (d,  $J=8.8$  Hz, 2H), 3.78 (s, 3H), 3.47 (t,  $J=6$  Hz, 1H), 2.69 (br, 2H), 2.49 (br, 2H), 1.73-1.61 (m, 7H), 1.57-1.46 (m, 3H), 1.39-1.32 (m, 7H), 0.92-0.89 (m, 3H);  $^{13}\text{C}$  NMR (400 MHz,  $\text{CDCl}_3$ ) ppm 159.2, 133.0, 115.8, 113.7, 86.5, 85.3, 58.6, 55.1, 50.5, 33.5, 31.8, 29.1, 26.9, 26.2, 24.6, 22.6, 14.1.

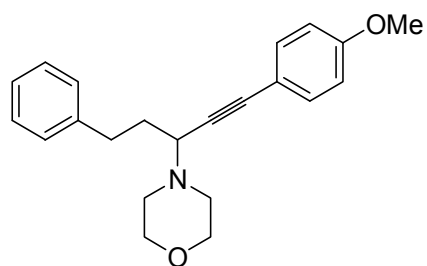

**4-(1-(4-methoxyphenyl)-5-phenylpent-1-yn-3-yl)morpholine (table 2, entry 19):**  $^1\text{H}$  NMR (400 MHz,  $\text{CDCl}_3$ , ppm):  $\delta$  7.44 (d,  $J = 8.8$  Hz, 2H), 7.34-7.25 (m, 5H), 6.89 (d,  $J = 8.8$  Hz), 3.84 (s, 3H), 3.83-3.79 (m, 4H), 3.52 (t,  $J = 16$  Hz, 1H), 2.98-2.91 (m, 1H), 2.87-2.78 (m, 3H), 2.62-2.61 (m, 2H), 2.09-2.07 (m, 2H);  $^{13}\text{C}$  NMR (400 MHz,  $\text{CDCl}_3$ ) ppm 159.4, 141.6, 133.1, 128.6, 128.4, 125.9, 115.3, 113.9, 86.4, 85.2, 67.2, 57.1, 55.3, 49.7, 34.6, 32.6.

3. Copy of original  $^1\text{H}$  NMR and  $^{13}\text{C}$  NMR of products.

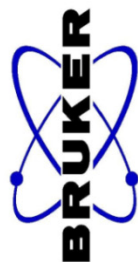

Dr. Gholi nejad  
NAME EXPNO 1  
PROCNO 28  
Date\_ 20111102  
Time 11.20  
INSTRUM spect  
PROBHD 5 mm PABBO BB-  
PULPROG zg30  
TD 65536  
SOLVENT CDCl3  
NS 24  
DS 0  
SWH 8012.820 Hz  
FIDRES 0.122266 Hz  
AQ 4.0894966 sec  
RG 144  
DW 62.400 usec  
DE 6.50 usec  
TE 297.9 K  
D1 6.0000000 sec  
TD0 1  
===== CHANNEL f1 =====  
NUC1 1H  
P1 14.00 usec  
PL1 -2.00 dB  
PL1W 11.86359406 W  
SF01 400.2236020 MHz  
SI 32768  
SF 400.2200000 MHz  
WDW EM  
SSB 0  
LB 0.30 Hz  
GB 0  
PC 1.00

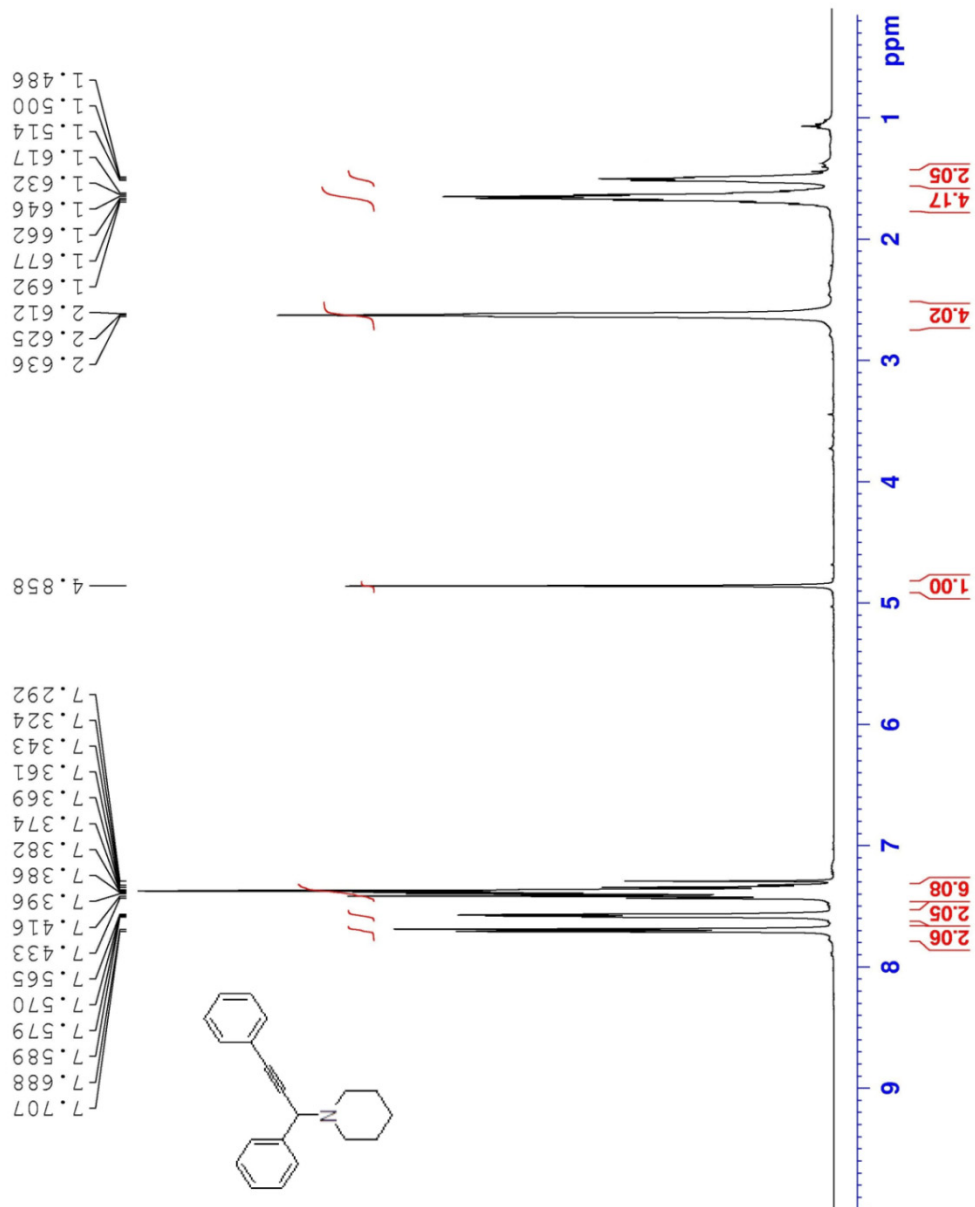



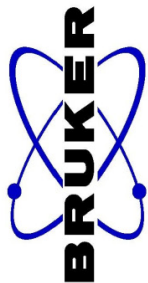

NAME Dr.Gholi nejad  
EXPNO 27

PROCNO 1  
Date\_ 20111102  
Time 11.21

INSTRUM spect  
PROBHD 5 mm PABBO BB-

PULPROG zgpg  
ID 65536

SOLVENT CDCl3  
NS 40

DS 0  
SWH 25252.525 Hz

FIDRES 0.385323 Hz  
AQ 1.2976629 sec

RG 2050  
DW 19.800 usec

DE 6.50 usec  
TE 298.2 K

D1 3.00000000 sec  
D11 0.03000000 sec

TDO 1

===== CHANNEL f1 =====  
NUC1 13C  
P1 9.00 usec  
PL1 -0.90 dB  
PL1W 42.02801895 W  
SFO1 100.6479784 MHz

===== CHANNEL f2 =====  
CPDPRG2 waltz16  
NUC2 1H  
PCPD2 90.00 usec  
PL2 -2.00 dB  
PL12 14.16 dB  
PL13 17.90 dB

PL12W 11.86359406 W  
PL12W 0.28722104 W  
PL13W 0.12139934 W  
SFO2 400.2216009 MHz  
SI 32768  
SF 100.6353990 MHz

WDW EM  
SSB 0  
LB 1.00 Hz  
GB 0  
PC 1.40

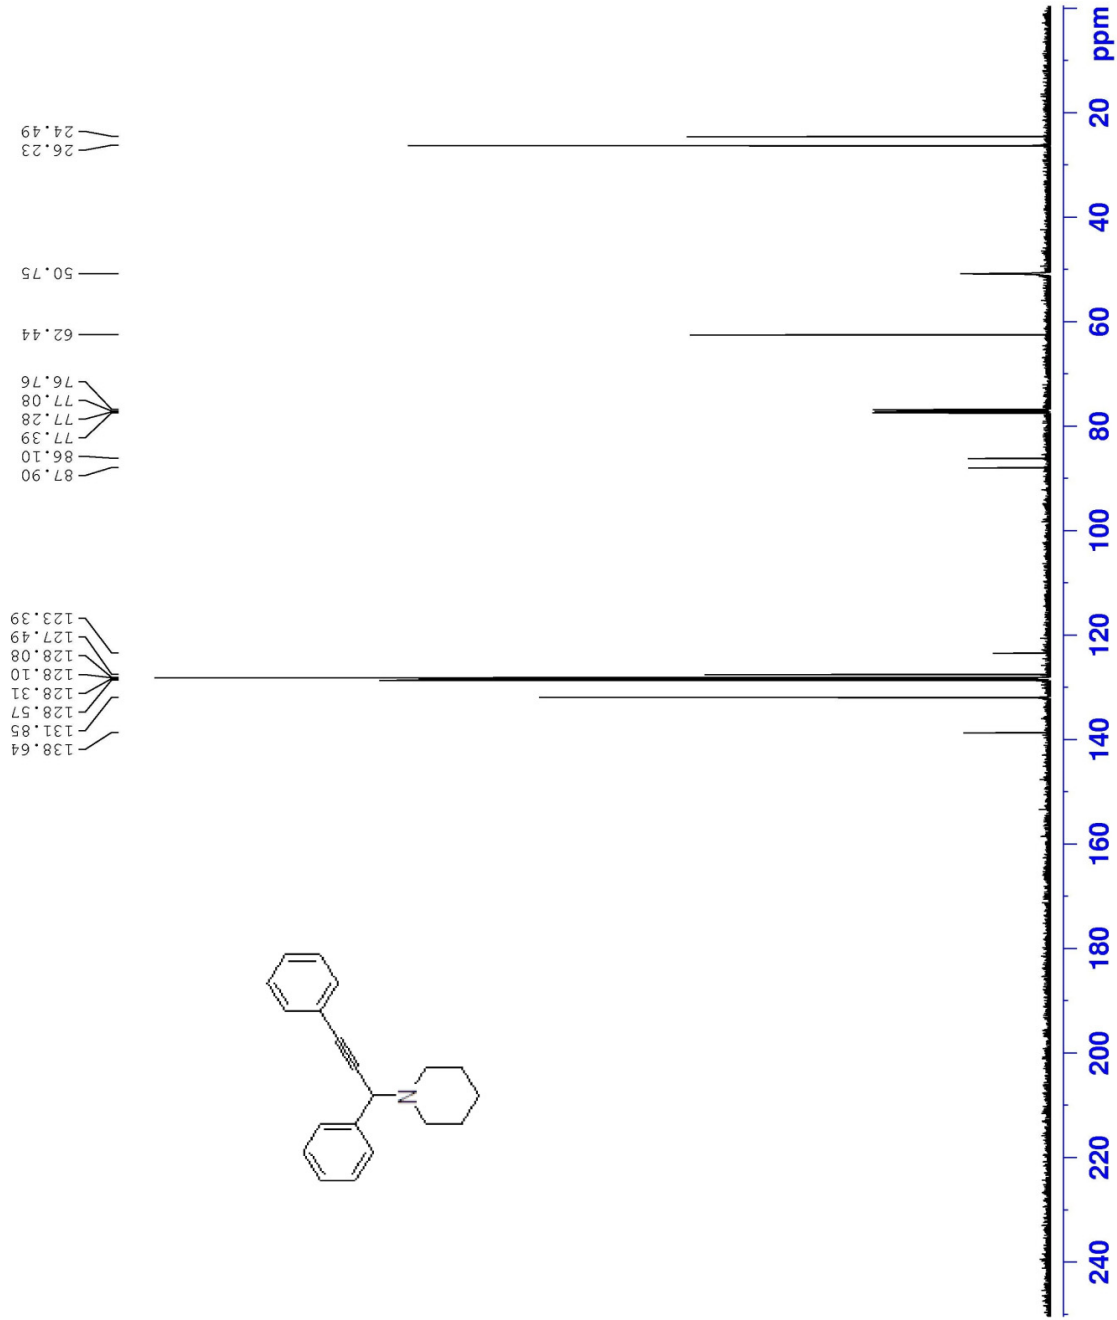

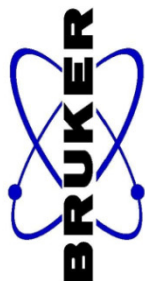

Dr. Ghollı nejad  
NAME EXPNO 1  
PROCNO 24  
Date\_ 20111031  
Time\_ 13.01  
INSTRUM spect  
PROBHD 5 mm PABBO BB-  
PULPROG zg30  
TD 65536  
SOLVENT CDCl3  
NS 24  
DS 0  
SWH 8012.820 Hz  
FIDRES 0.122266 Hz  
AQ 4.0894966 sec  
RG 1820  
DW 62.400 usec  
DE 6.50 usec  
TE 295.9 K  
DL 6.00000000 sec  
TD0 1  
===== CHANNEL f1 =====  
NUC1 1H  
PI 14.00 usec  
PL1 -2.00 dB  
PL1W 11.86359406 W  
SFO1 400.2236020 MHz  
SI 32768  
SF 400.2200000 MHz  
WDW EM  
SSB 0  
LB 0.30 Hz  
GB 0  
PC 1.00

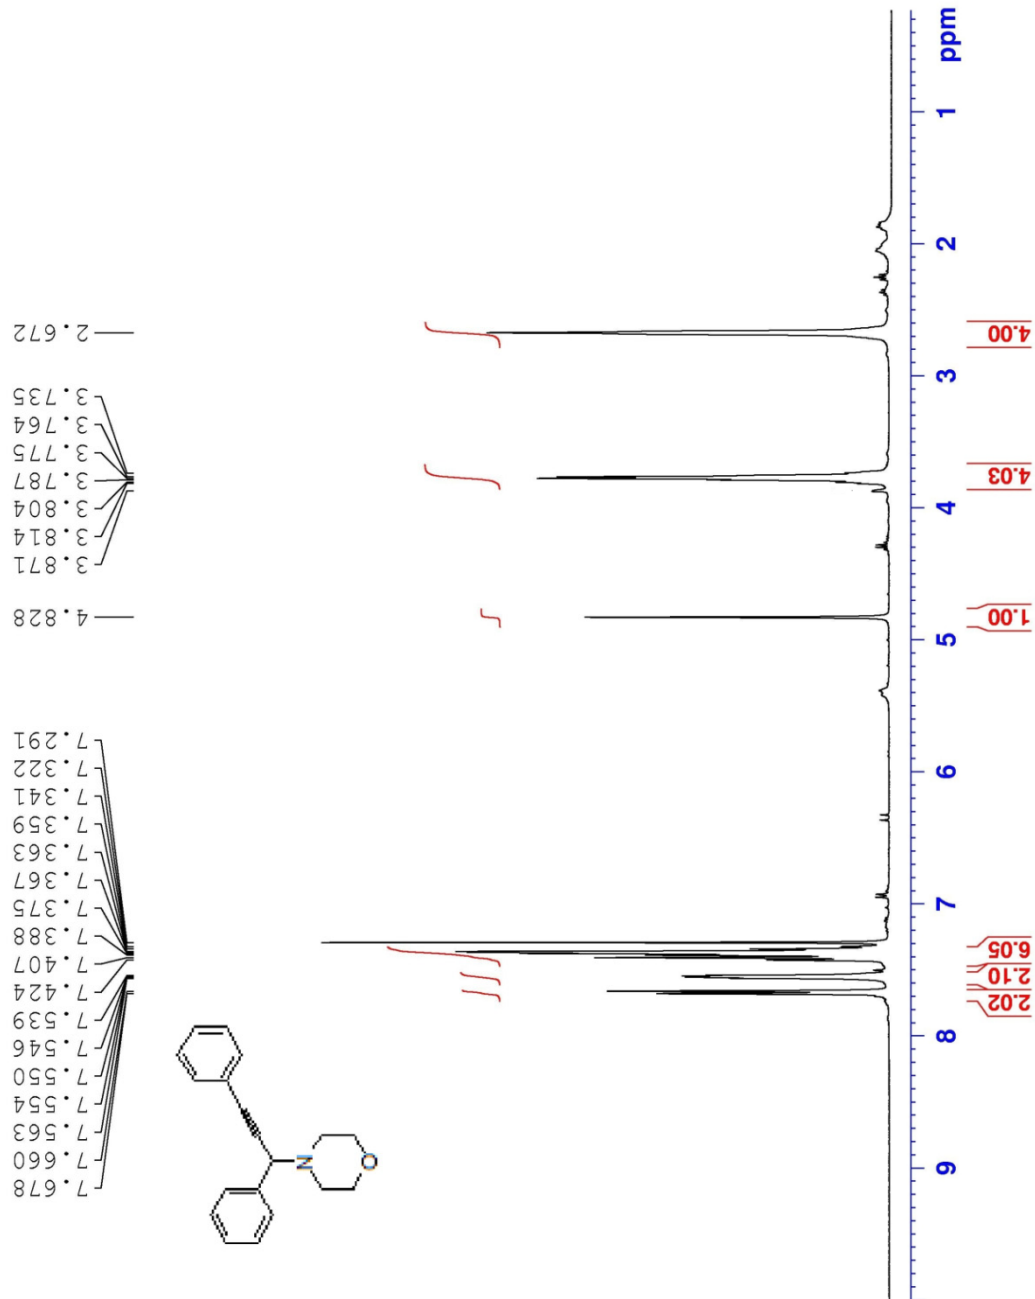

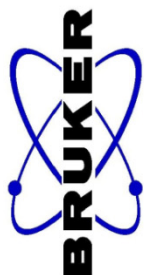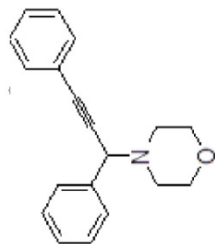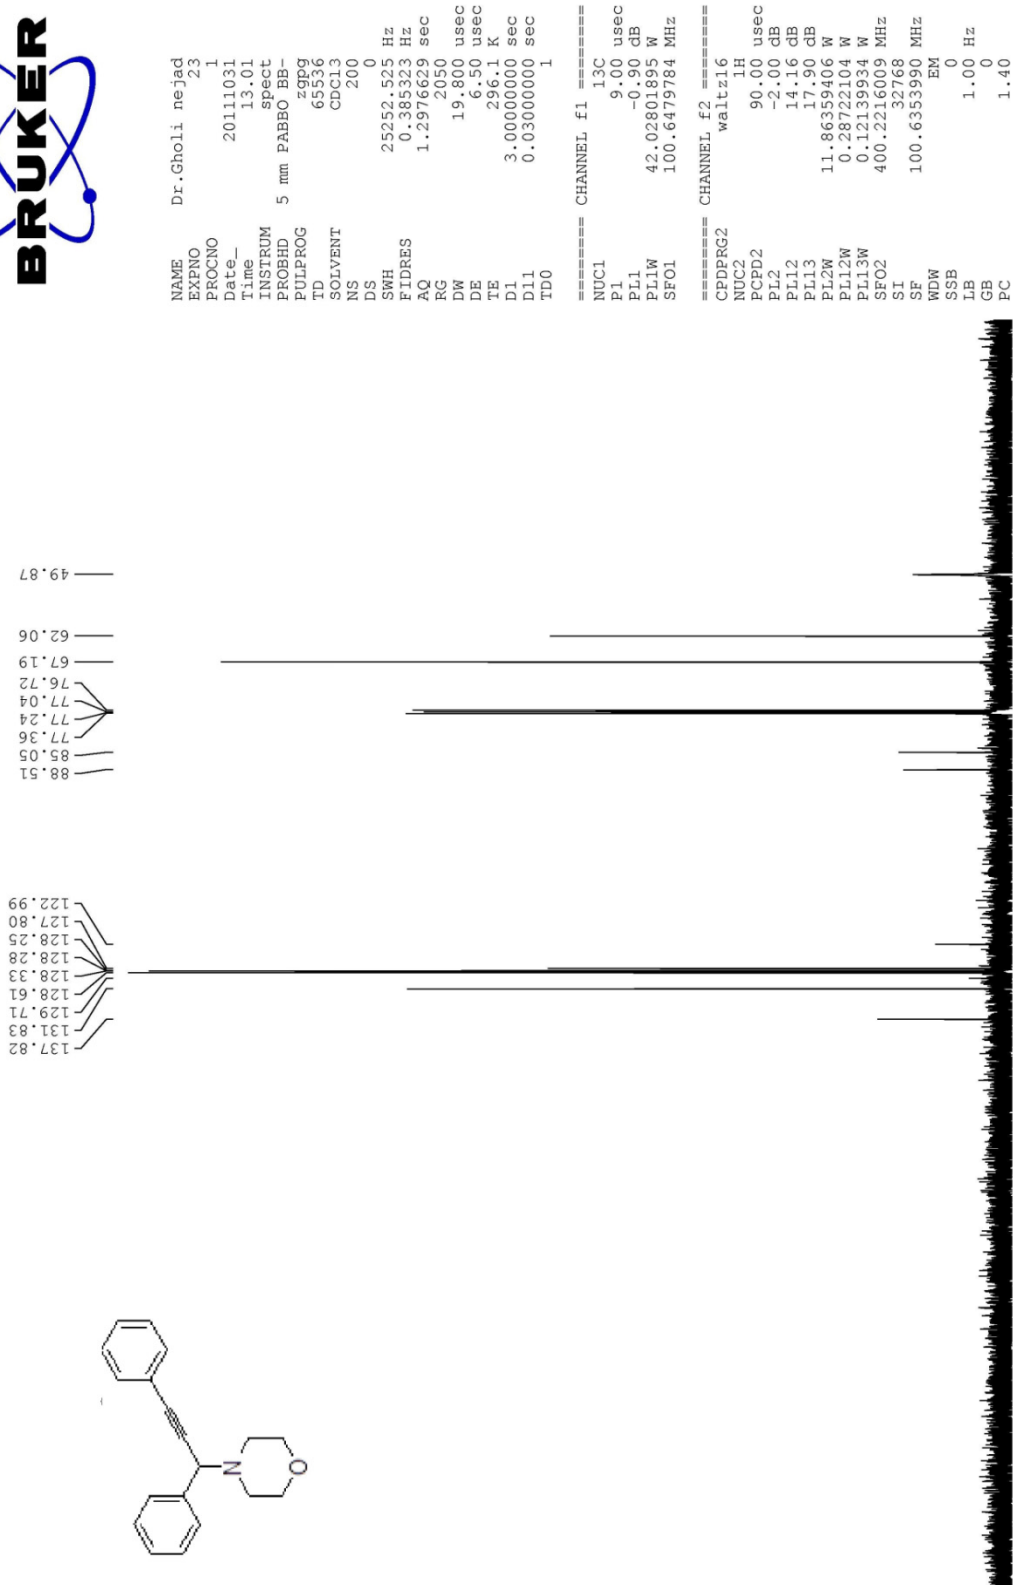

NAME Dr.Gholi nejad  
EXPNO 23  
PROCNO 1  
Date\_ 20111031  
Time 13.01  
INSTRUM spect  
PROBHD 5 mm PABBO BB-  
PULPROG zgpg  
TD 65536  
SOLVENT CDCl3  
NS 200  
DS 0  
SWH 25252.525 Hz  
FIDRES 0.385323 Hz  
AQ 1.2976629 sec  
RG 2050  
DW 19.800 usec  
DE 6.50 usec  
TE 296.1 K  
D1 3.00000000 sec  
D11 0.03000000 sec  
TD0 1

==== CHANNEL f1 =====  
NUC1 13C  
P1 9.00 usec  
PL1 -0.90 dB  
PL1W 42.02801895 W  
SFO1 100.6479784 MHz

==== CHANNEL f2 =====  
CPDPRG2 waltz16  
NUC2 1H  
PCPD2 90.00 usec  
PL2 -2.00 dB  
PL12 14.16 dB  
PL13 17.90 dB  
PL2W 11.86359406 W  
PL12W 0.28722104 W  
PL13W 0.12139934 W  
SFO2 400.2216009 MHz  
SI 32768  
SF 100.6353990 MHz  
WDW EM  
SSB 0  
LB 1.00 Hz  
GB 0  
PC 1.40

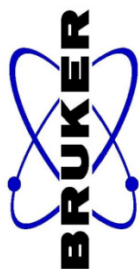

Dr. Chohli nejad  
NAME  
EXPNO 34  
PROCNO 1  
Date\_ 20111109  
Time\_ 15.36  
INSTRUM spect  
PROBHD 5 mm PABBO BB-  
PULPROG zg30  
TD 65536  
SOLVENT CDC13  
NS 24  
DS 0  
SWH 8012.820 Hz  
FIDRES 0.122266 Hz  
AQ 4.0894966 sec  
RG 128  
DE 62.400 usec  
WE 6.50 usec  
TE 296.7 K  
D1 6.0000000 sec  
TD0 1  
===== CHANNEL f1 =====  
NUC1 1H  
P1 14.00 usec  
PL1 -2.00 dB  
PL1W 11.86359406 W  
SFO1 400.2236020 MHz  
SI 32768  
SF 400.2200000 MHz  
WDW EM  
SSB 0  
LB 0.30 Hz  
GB 0  
PC 1.00

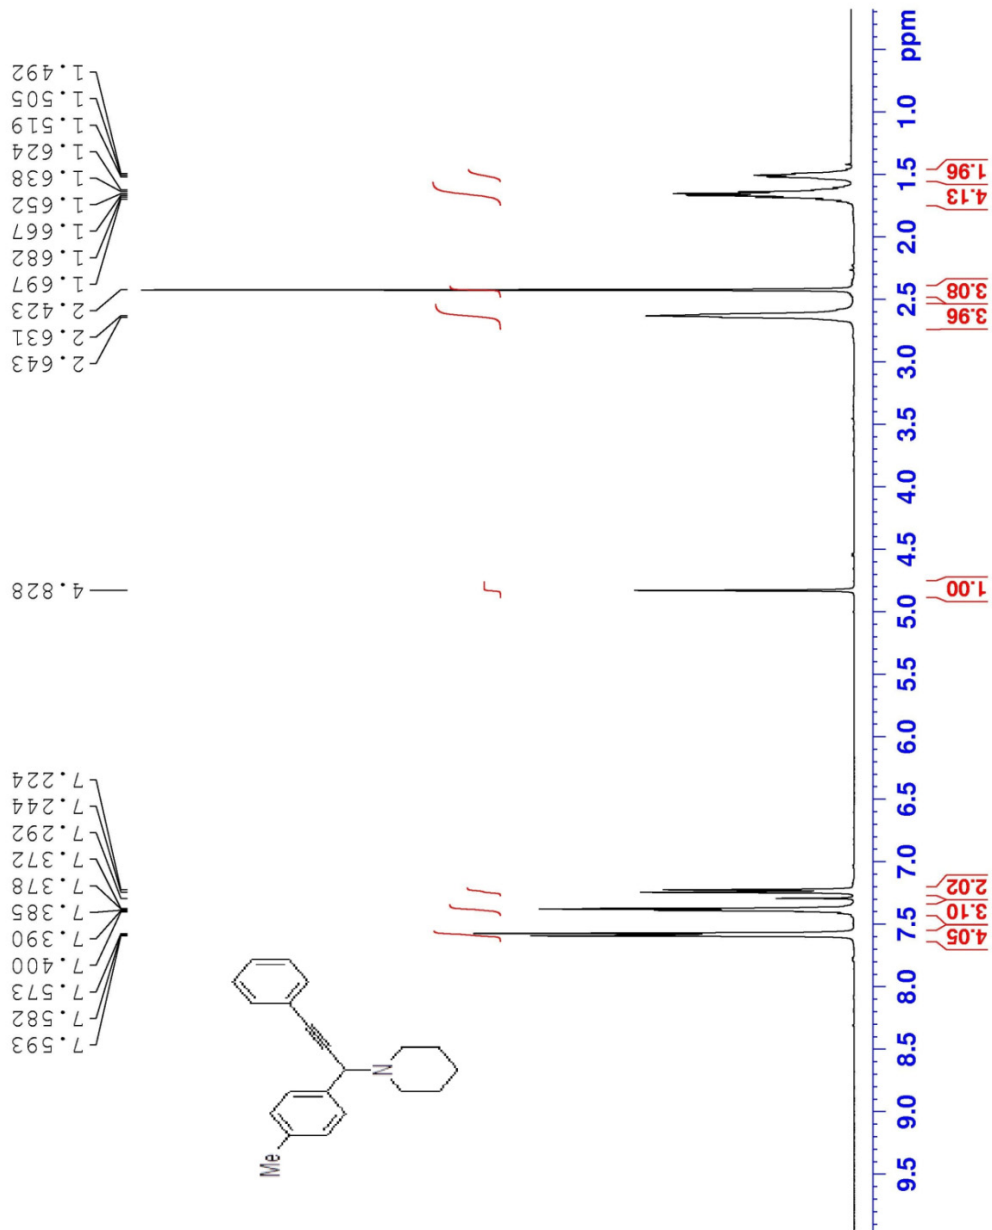

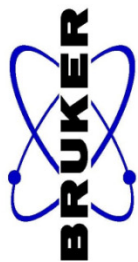

Dr.Ghoili nejad  
NAME  
EXENO 33  
PROCNO 1  
Date\_ 20111109  
Time 15.38  
INSTRUM spect  
PROBHD 5 mm PABBO BB-  
PULPROG zgpg  
TD 65536  
SOLVENT CDCl3  
NS 81  
DS 0  
SWH 25252.525 Hz  
FIDRES 0.385323 Hz  
AQ 1.2976829 sec  
RG 2030  
DW 19.800 usec  
DE 6.50 usec  
TE 296.7 K  
D1 3.0000000 sec  
D11 0.0300000 sec  
TD0 1

==== CHANNEL f1 =====  
NUC1 13C  
P1 9.00 usec  
PL1 -0.90 dB  
PL1W 42.02801895 W  
SFO1 100.6479784 MHz

==== CHANNEL f2 =====  
CPDPRG2 wait#16  
NUC2 1H  
PCPD2 90.00 usec  
PL2 12.00 dB  
PL12 14.16 dB  
PL13 17.90 dB  
PL2W 11.86359406 W  
PL12W 0.28722104 W  
PL13W 0.12139934 W  
SFO2 400.2216009 MHz  
SI 32768  
SF 100.6353990 MHz  
WDW EM  
SSB 0  
LB 1.00 Hz  
GB 0  
PC 1.40

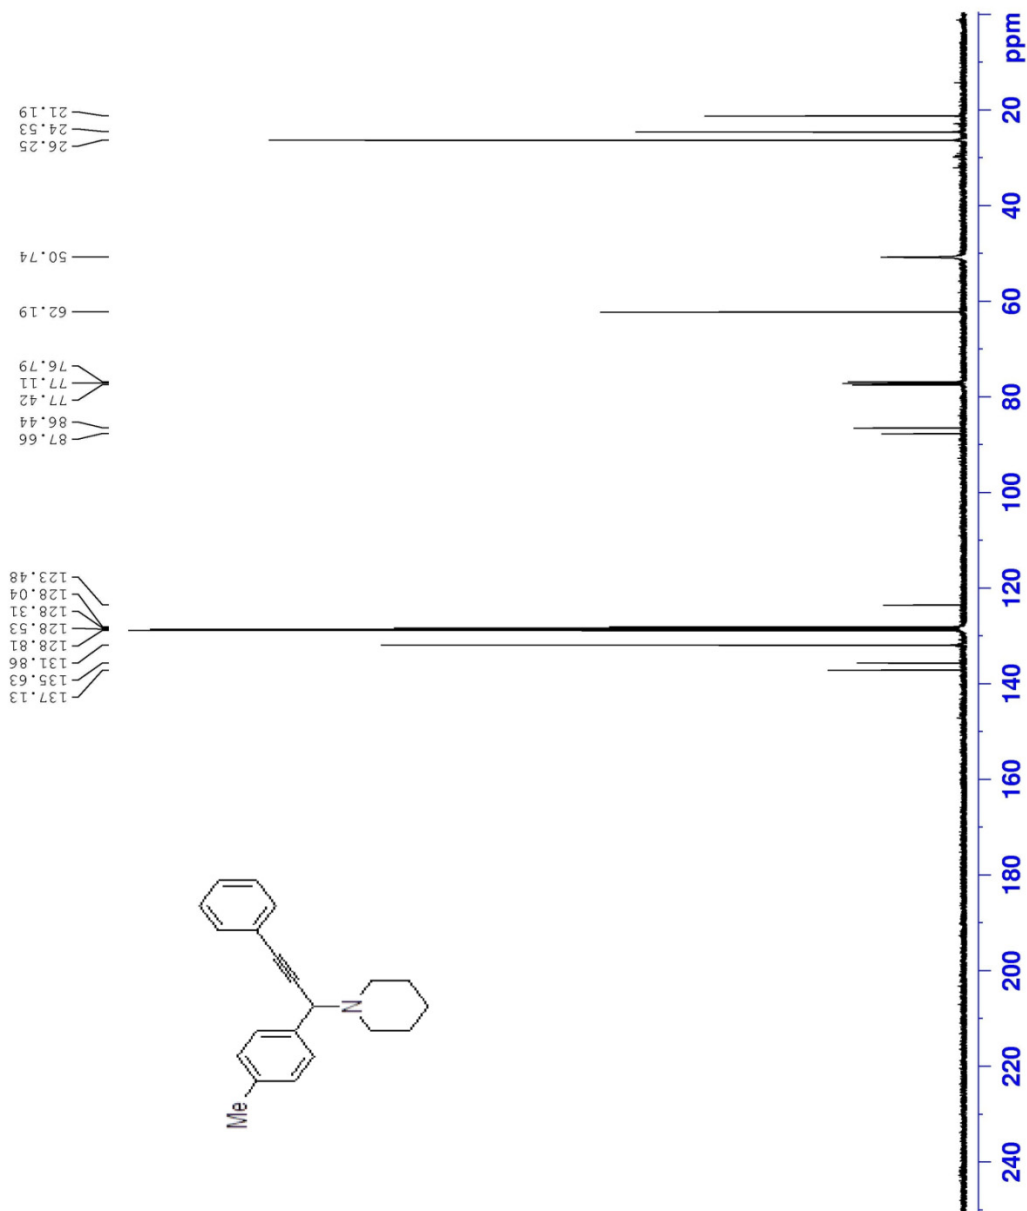

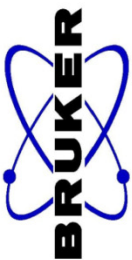

Dr.Ghohli nejad  
NAME  
EXPNO 47  
PROCNO 1  
Date\_ 20111126  
Time 14.44  
INSTRUM spect  
PROBHD 5 mm PABBO BB-  
PULPROG zg30  
TD 65536  
SOLVENT CDC13  
NS 24  
DS 0  
SWH 8012.820 Hz  
FIDRES 0.122266 Hz  
AQ 4.0894966 sec  
RG 256  
DW 62.400 usec  
DE 6.50 usec  
TE 295.1 K  
D1 6.0000000 sec  
TD0 1  
===== CHANNEL f1 =====  
NUC1 1H  
P1 14.00 usec  
PL1 -2.00 dB  
PL1W 11.86359406 W  
SFO1 400.2236020 MHz  
SI 32768  
SF 400.2200000 MHz  
WDW EM  
SSB 0  
LB 0.30 Hz  
GB 0  
PC 1.00

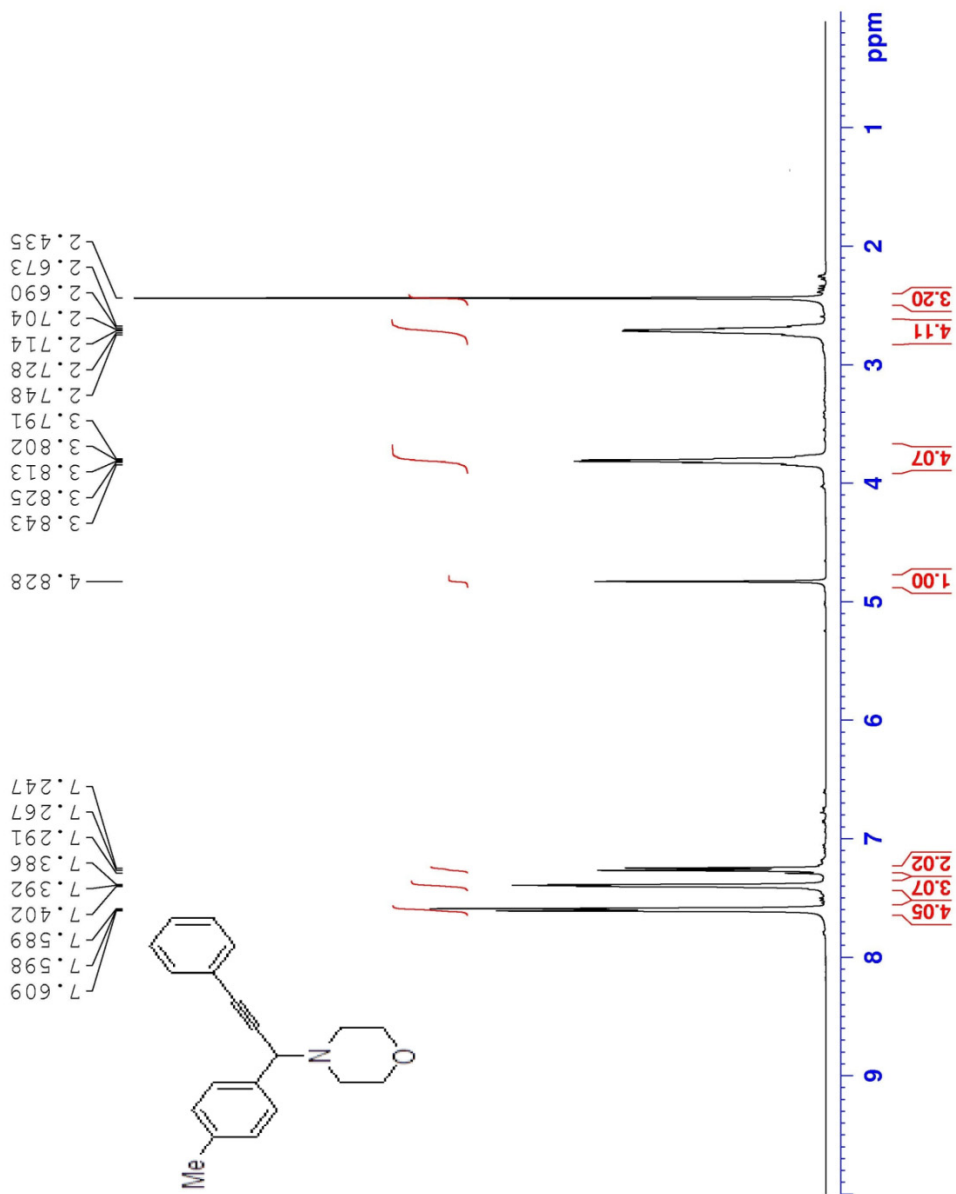

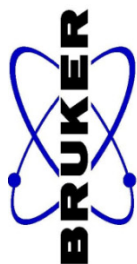

NAME Dr.Gholi nejad  
EXPNO 46  
PROCNO 1  
Date\_ 20111126  
Time\_ 14.46  
INSTRUM spect  
PROBHD 5 mm FAPBO BB-  
PULPROG zgpg  
TD 65536  
SOLVENT CDCl3  
NS 40  
DS 0  
SWH 25252.525 Hz  
FIDRES 0.385323 Hz  
AQ 1.2976629 sec  
RG 2050  
DW 19.800 usec  
DE 6.50 usec  
TE 295.5 K  
D1 3.00000000 sec  
D11 0.03000000 sec  
TD0 1

===== CHANNEL f1 =====  
NUC1 13C  
PL 9.00 usec  
PL1 -0.50 dB  
PL1W 42.02801895 W  
SFO1 100.6479784 MHz

===== CHANNEL f2 =====  
CFPRG2 waltz16  
NUC2 1H  
PCPD2 90.00 usec  
PL2 -2.00 dB  
PL12 14.16 dB  
PL13 17.90 dB  
PL2W 11.86359406 W  
PL12W 0.28722104 W  
PL13W 0.12139934 W  
SFO2 400.2216009 MHz  
SI 32768  
SF 100.6353990 MHz  
WDW EM  
SSB 0  
LB 1.00 Hz  
GB 0  
PC 1.40

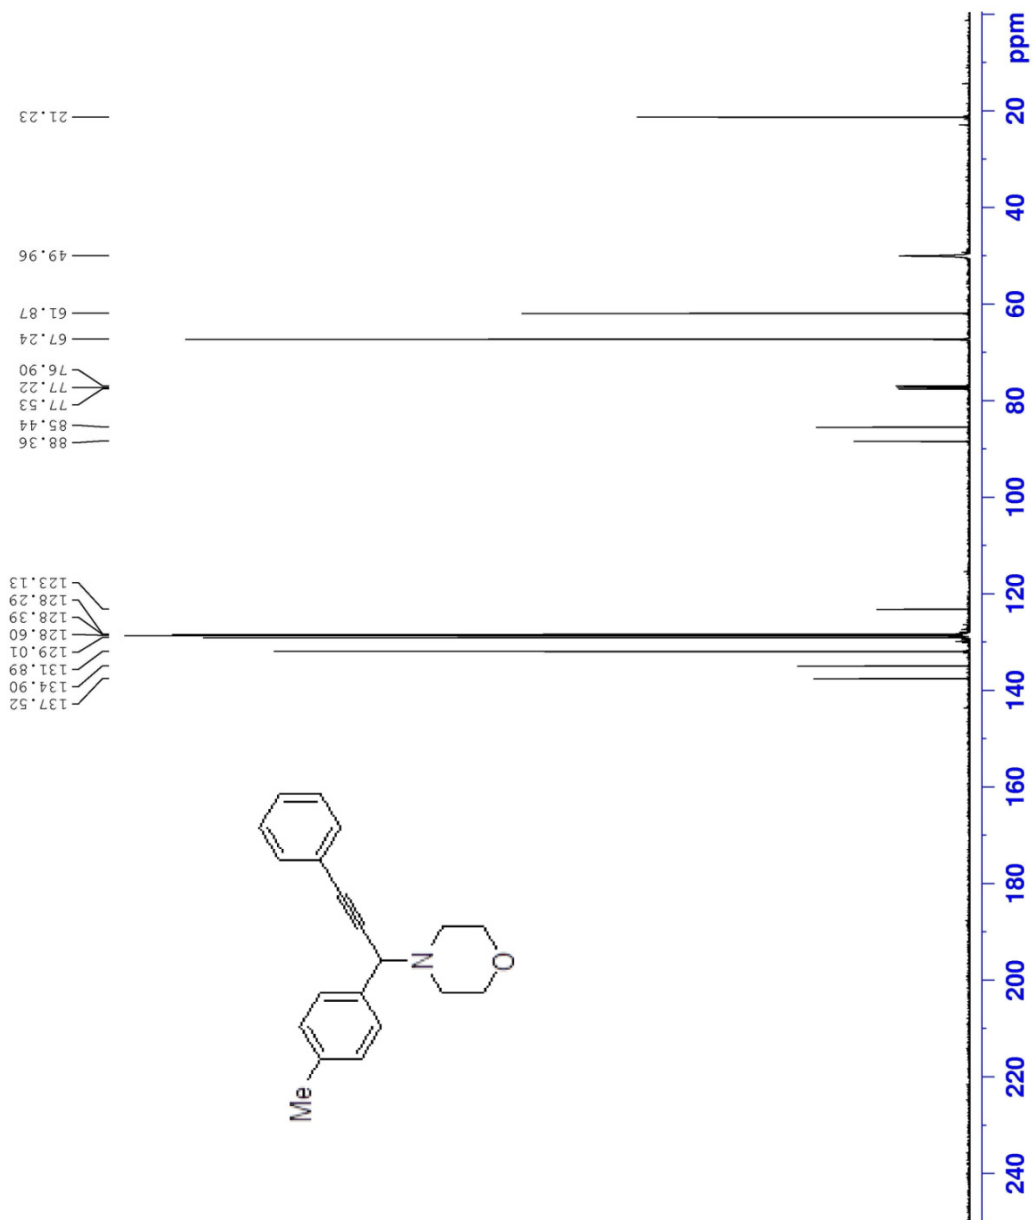

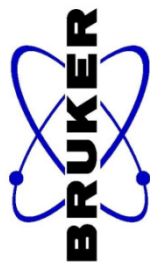

NAME Dr.Gholi nejad  
EXPNO 32  
PROCNO 1  
Date\_ 20111105  
Time 15.10  
INSTRUM spect  
PROBHD 5 mm PABBO BB-  
PULPROG zg30  
TD 65536  
SOLVENT CDCl3  
NS 24  
DS 0  
SWH 8012.820 Hz  
FIDRES 0.122266 Hz  
AQ 4.0894966 sec  
RG 1030  
DE 62.400 usec  
TE 297.4 K  
D1 6.00000000 sec  
TDO 1  
===== CHANNEL f1 =====  
NUC1 1H  
P1 14.00 usec  
PL1 -2.00 dB  
PL1W 11.86359406 W  
SFO1 400.2236020 MHz  
SI 32768  
SF 400.2200000 MHz  
WDW EM  
SSB 0  
LB 0.30 Hz  
GB 0  
PC 1.00

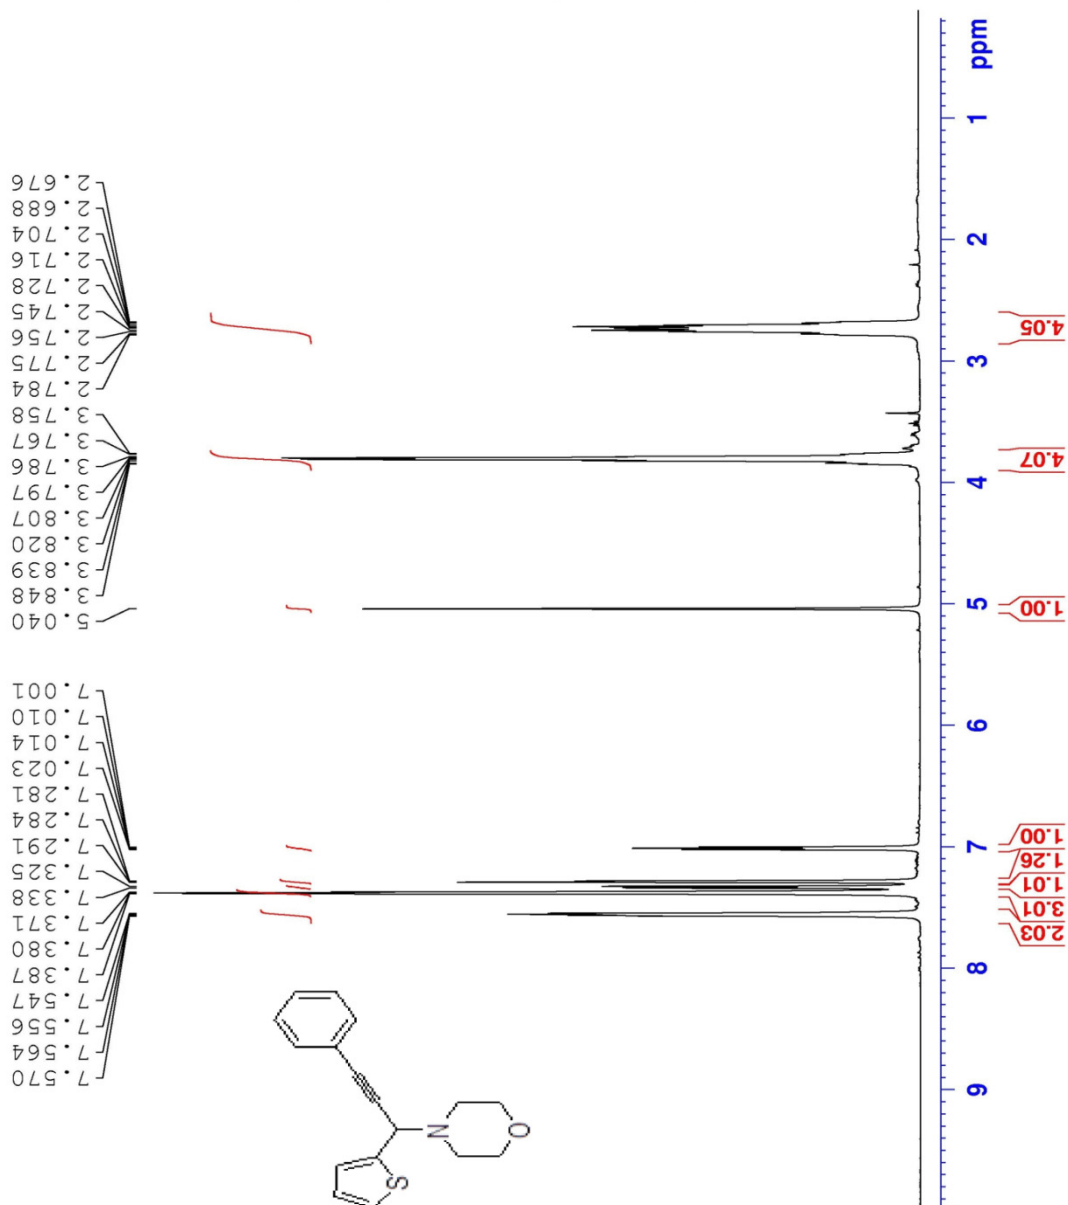



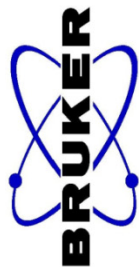

Dr.Gholi nejad  
NAME  
EXPNO 51  
PROCNO 1  
Date\_ 20111105  
Time 15.13  
INSTRUM spect  
PROBHD 5 mm PABBO BB-  
PULPROG zgpg  
TD 65536  
SOLVENT CDCl3  
NS 100  
DS 0  
SWH 25252.525 Hz  
FIDRES 0.385323 Hz  
AQ 1.2976629 sec  
RG 2050  
DW 19.800 usec  
DE 6.50 usec  
TE 297.8 K  
D1 3.0000000 sec  
D11 0.0300000 sec  
TD0 1

==== CHANNEL f1 =====  
NUC1 13C  
P1 9.00 usec  
PL1 -0.90 dB  
PL1W 42.02801895 W  
SF01 100.6479784 MHz

==== CHANNEL f2 =====  
CPDPRG2 waltz16  
NUC2 1H  
PCPD2 90.00 usec  
PL2 -2.00 dB  
PL12 14.16 dB  
PL13 17.90 dB  
PL2W 11.86359406 W  
PL12W 0.28722104 W  
PL13W 0.12139934 W  
SFO2 400.2216009 MHz  
SI 32768  
SF 100.6353990 MHz  
WDW EM  
SSB 0  
LB 1.00 Hz  
GB 0  
PC 1.40

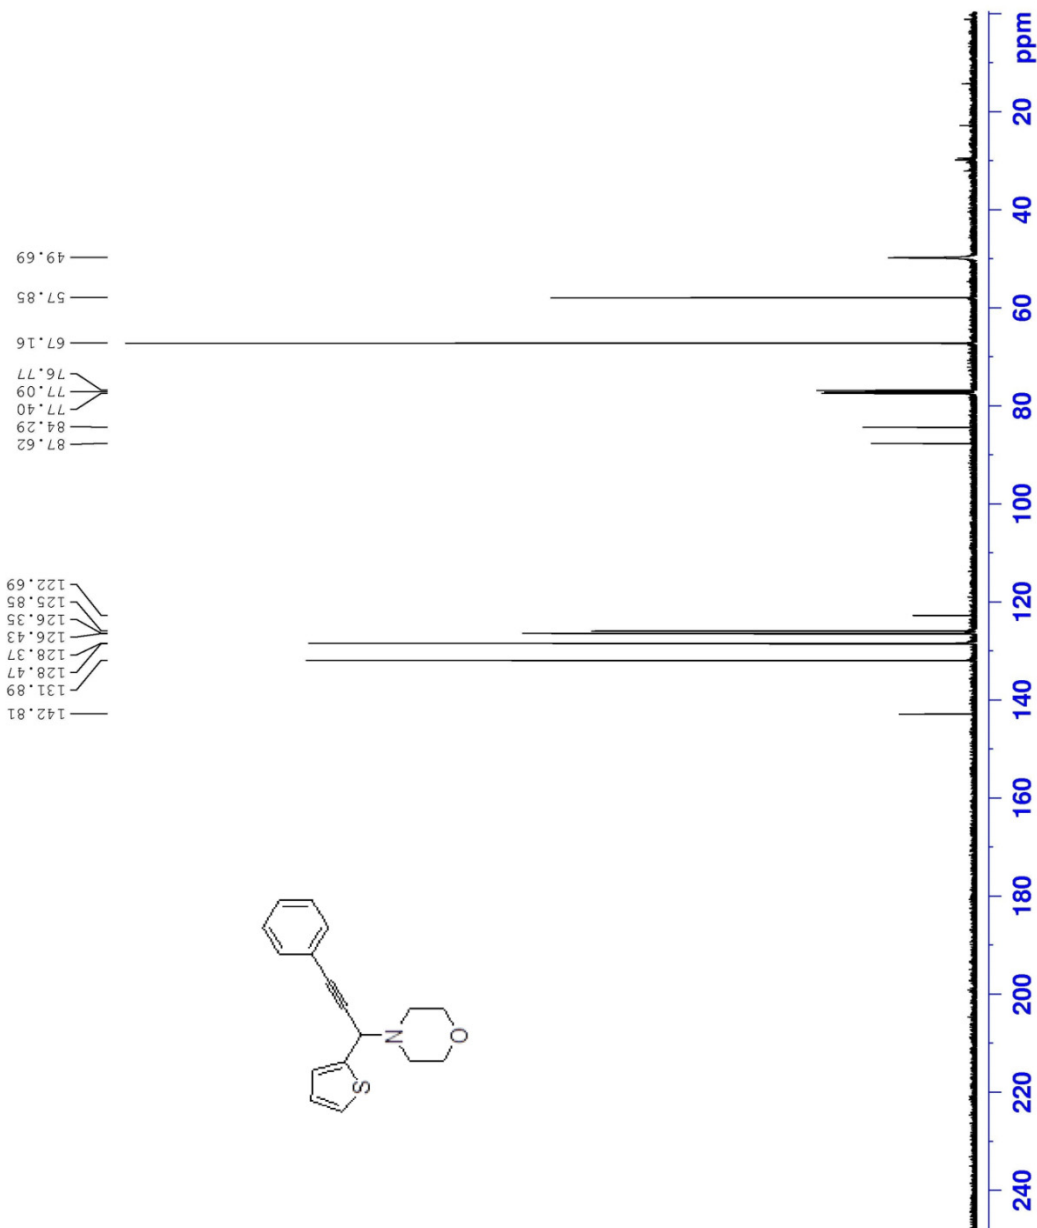

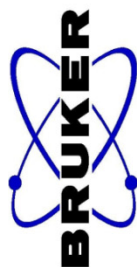

NAME Dr.Gholi nejad  
EXPNO 1  
PROCNO 62  
Date\_ 20111214  
Time\_ 10.39  
INSTRUM spect  
PROBHD 5 mm PABBO BB-  
PULPROG zg30  
TD 65536  
SOLVENT CDCl3  
NS 19  
DS 0  
SWH 8012.820 Hz  
FIDRES 0.122266 Hz  
AQ 4.0894966 sec  
RG 114  
DW 62.400 usec  
DE 6.50 usec  
TE 297.0 K  
D1 6.0000000 sec  
TD0 1  
===== CHANNEL f1 =====  
NUC1 1H  
P1 14.00 usec  
PL1 -2.00 dB  
PL1W 11.86359406 W  
SF01 400.2236020 MHz  
SI 32768  
SF 400.2200000 MHz  
WDW EM  
SSB 0  
LB 0.30 Hz  
GB 0  
PC 1.00

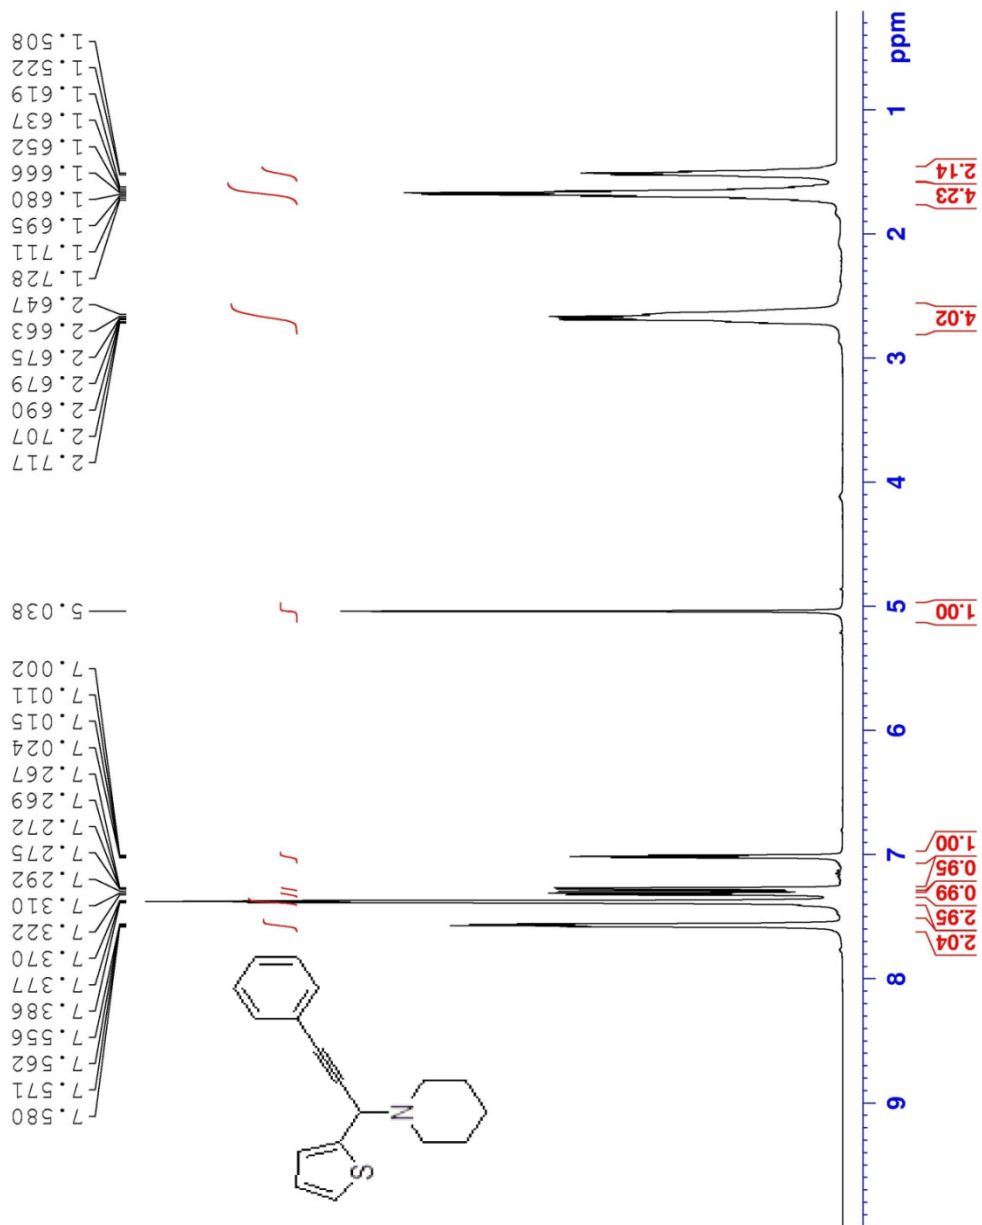

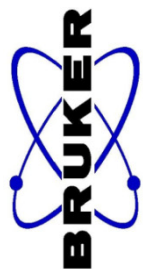

NAME Dr.Gholi nejad  
EXPNO 58  
PROCNO 1  
Date\_ 20111212  
Time\_ 10.05  
INSTRUM spect  
PROBHD 5 mm PABBO BB-  
PULPROG zgpg  
TD 65536  
SOLVENT CDCl3  
NS 50  
DS 0  
SWH 25252.525 Hz  
FIDRES 0.385323 Hz  
AQ 1.2976629 sec  
RG 2050  
DW 19.800 usec  
DE 6.50 usec  
TE 297.4 K  
D1 3.00000000 sec  
D11 0.03000000 sec  
TD0 1

==== CHANNEL f1 =====  
NUC1 13C  
P1 9.00 usec  
PL1 -0.50 dB  
PL1W 42.02801895 W  
SFO1 100.6479784 MHz

==== CHANNEL f2 =====  
CPDPRG2 waltz16  
NUC2 1H  
PCPD2 90.00 usec  
PL2 -2.00 dB  
PL12 14.16 dB  
PL13 17.90 dB  
PL2W 11.86359406 W  
PL12W 0.28722104 W  
PL13W 0.12139934 W  
SFO2 400.2216009 MHz  
SI 32768  
SF 100.6353990 MHz  
WDW EM  
SSB 0  
LB 1.00 Hz  
GB 0  
PC 1.40

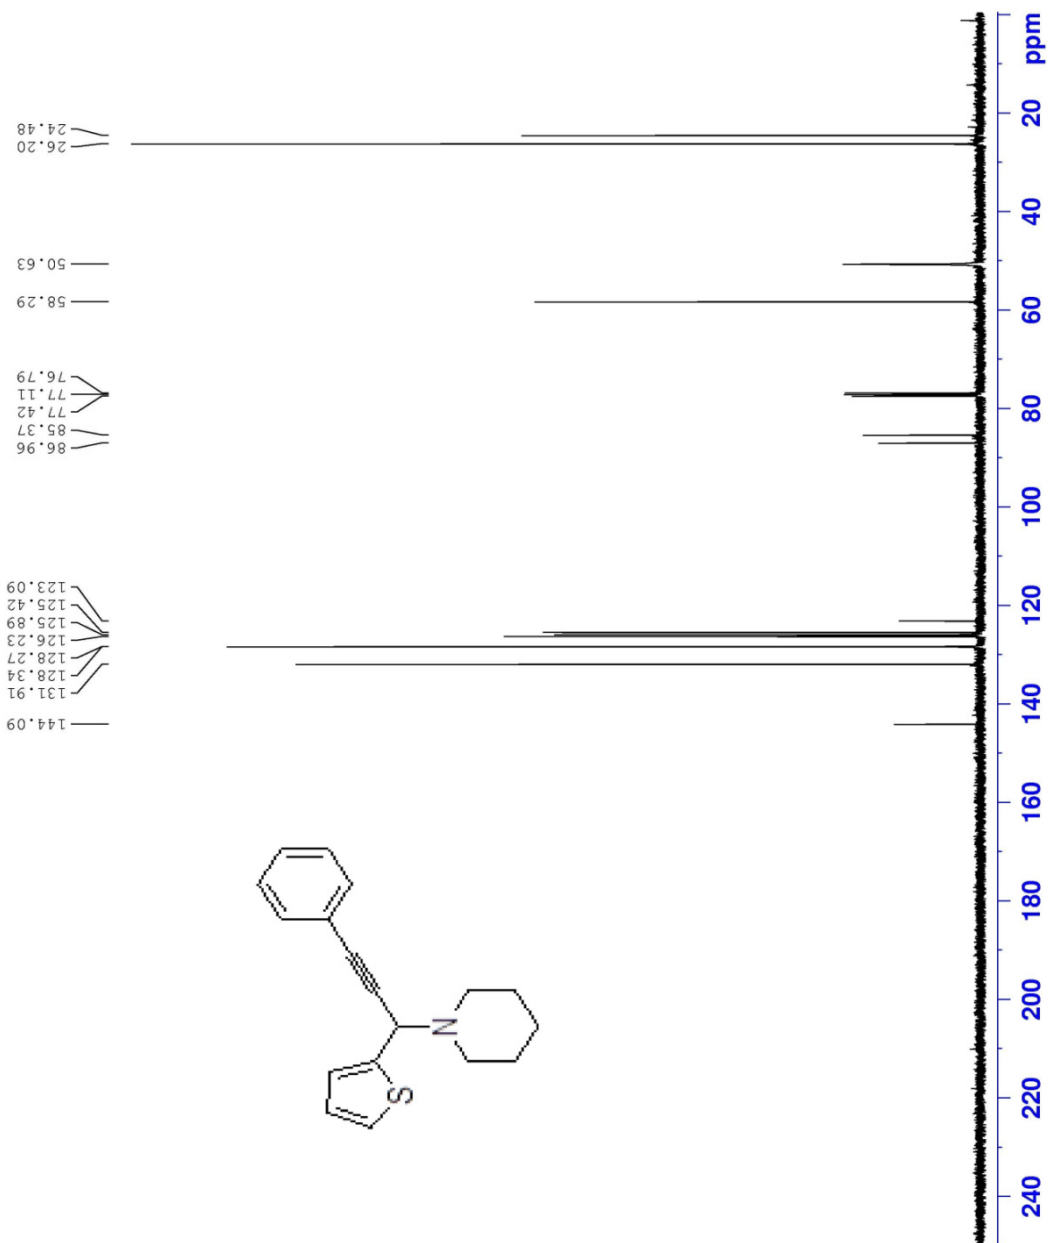

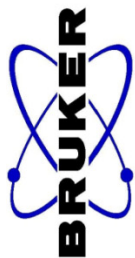

Dr.Ghohli nejad  
NAME  
EXPNO 43  
PROCNO 1  
Date\_ 20111121  
Time 10.39  
INSTRUM spect  
PROBHD 5 mm PABBO BB-  
PULPROG zg30  
TD 65536  
SOLVENT CDC13  
NS 24  
DS 0  
SWH 8012.820 Hz  
FIDRES 0.122266 Hz  
AQ 4.0894966 sec  
RG 256  
DW 62.400 usec  
DE 6.50 usec  
TE 295.9 K  
D1 6.0000000 sec  
TD0 1  
===== CHANNEL f1 =====  
NUC1 1H  
P1 14.00 usec  
PL1 -2.00 dB  
PL1W 11.86359406 W  
SF01 400.2236020 MHz  
SI 32768  
SF 400.2200000 MHz  
WDW EM  
SSB 0  
LB 0.30 Hz  
GB 0  
PC 1.00

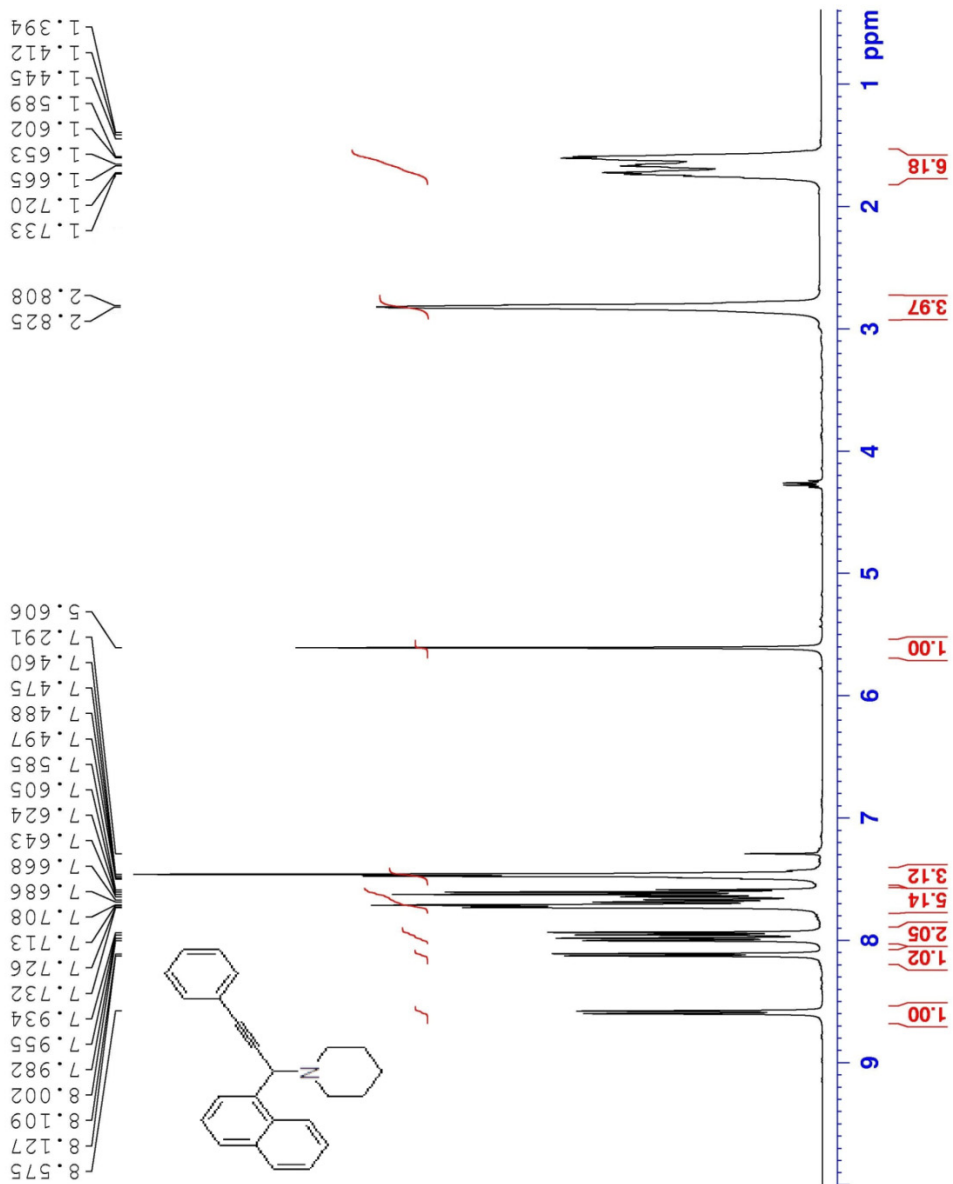

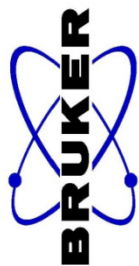

Dr.Gholi nejad  
NAME  
EXPNO 42  
PROCNO 1  
Date\_ 20111121  
Time 10.41  
INSTRUM spect  
PROBHD 5 mm PABBO BB-  
PULPROG zgpg30  
TD 65392  
SOLVENT CDCl3  
NS 30  
DS 0  
SWH 25252.525 Hz  
FIDRES 0.385323 Hz  
AQ 1.2376629 sec  
RG 2050  
DW 19.800 usec  
DE 6.50 usec  
TE 296.2 K  
D1 3.00000000 sec  
D11 0.03000000 sec  
TD0 1

===== CHANNEL f1 =====  
NUC1 13C  
PI 9.00 usec  
PL1 -0.90 dB  
PL1W 42.02801895 W  
SFO1 100.6479784 MHz

===== CHANNEL f2 =====  
CFDPRG2 waltz16  
NUC2 1H  
PCPD2 90.00 usec  
PL2 -2.00 dB  
PL12 14.16 dB  
PL13 17.90 dB  
PL2W 11.86359406 W  
PL12W 0.28722104 W  
PL13W 0.12139934 W  
SFO2 400.2216009 MHz  
SI 32768  
SF 100.6353990 MHz  
WDW EM  
SSB 0  
LB 1.00 Hz  
GB 0  
PC 1.40

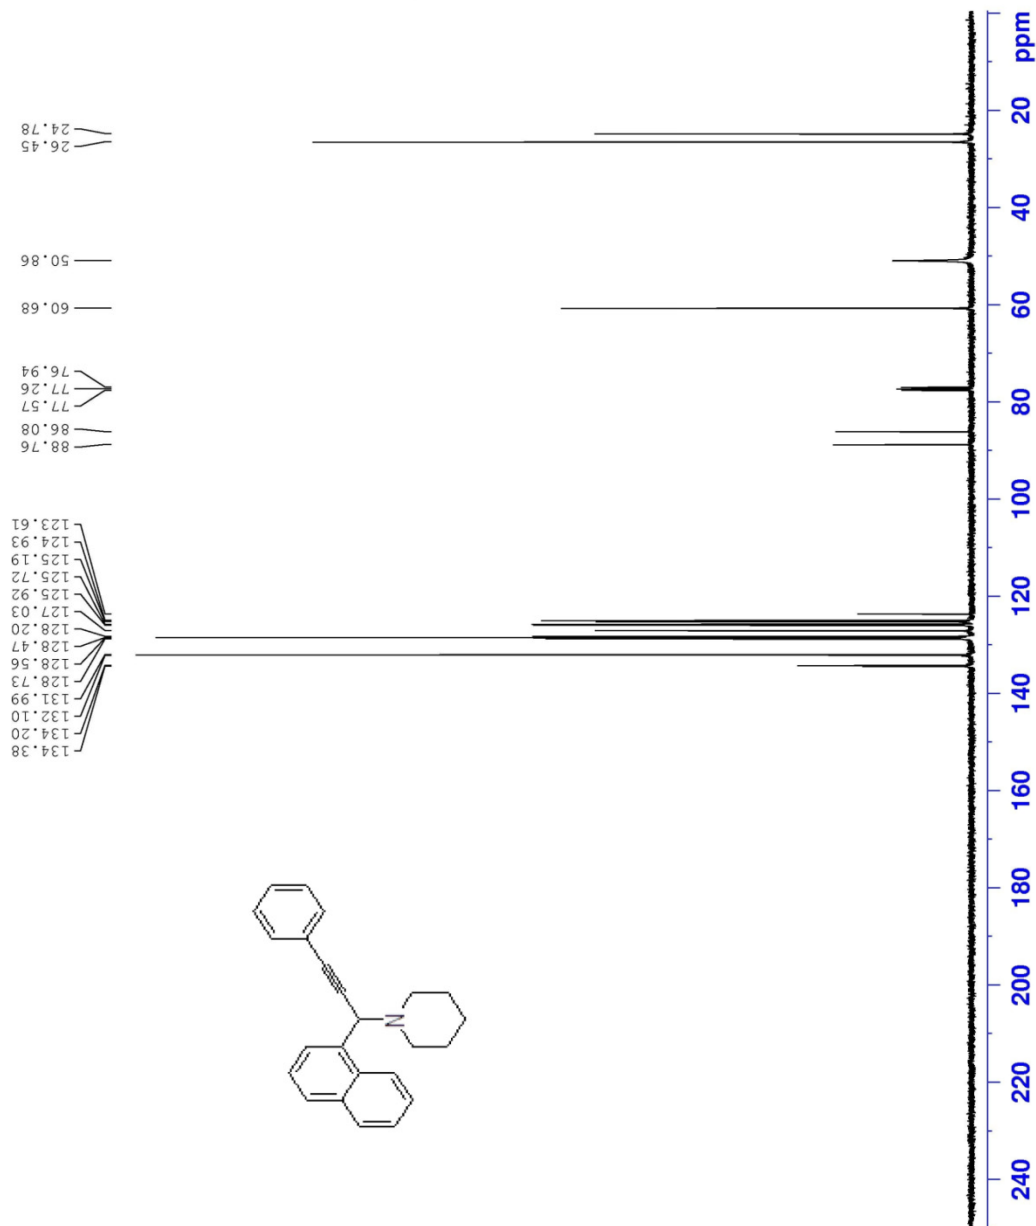

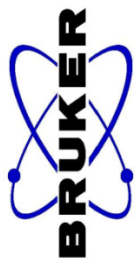

NAME Dr.Gholi nejad  
EXNO 49  
PROCNO 1  
Date\_ 20111126  
Time 14.56  
INSTRUM spect  
PROBHD 5 mm PABBO BB-  
PULPROG zg30  
TD 65536  
SOLVENT CDCl3  
NS 24  
DS 0  
SWH 8012.820 Hz  
FIDRES 0.122266 Hz  
AQ 4.0894966 sec  
RG 256  
DW 62.400 usec  
DE 6.50 usec  
TE 295.1 K  
D1 6.00000000 sec  
TD0 1

===== CHANNEL f1 =====  
NUC1 1H  
P1 14.00 usec  
PL1 -2.00 dB  
PL1W 11.86359406 W  
SF01 400.2236020 MHz  
SI 32768  
SF 400.2200000 MHz  
WDW EM  
SSB 0  
LB 0.30 Hz  
GB 0  
PC 1.00

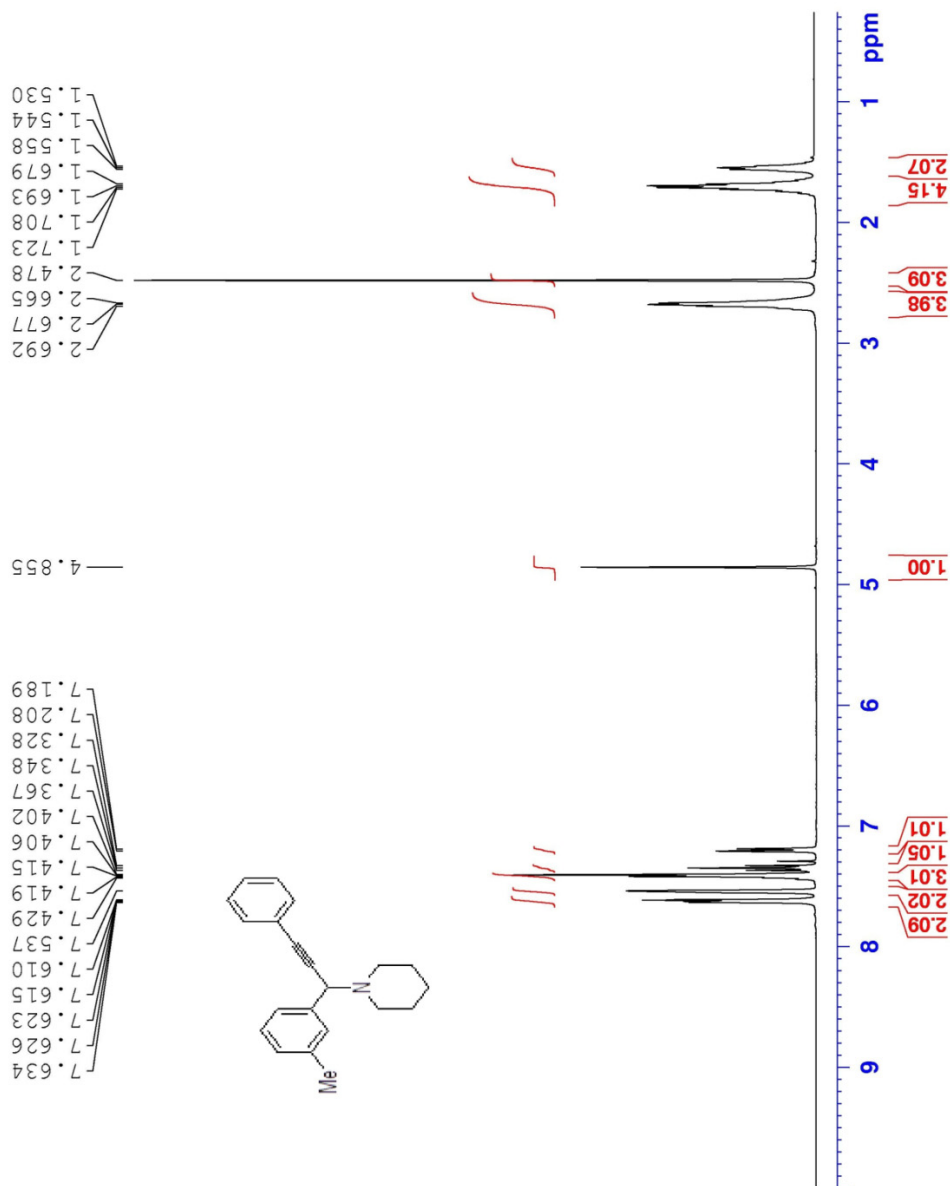

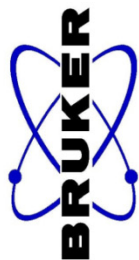

NAME Dr.Gholi nejad  
EXPNO 48  
PROCNO 1  
Date\_ 20111126  
Time 15.00  
INSTRUM Spect  
PROBHD 5 mm PABBO BB  
PULPROG zgpg  
TD 65536  
SOLVENT CDCl3  
NS 61  
DS 0  
SWH 25252.525 Hz  
FIDRES 0.385323 Hz  
AQ 1.2976629 sec  
RG 2050  
DW 19.800 usec  
DE 6.50 usec  
TE 295.6 K  
D1 3.00000000 sec  
D11 0.03000000 sec  
TD0 1

===== CHANNEL f1 =====  
NUC1 13C  
P1 9.00 usec  
PL1 -0.90 dB  
PL1W 42.02801895 W  
SFO1 100.6479784 MHz

===== CHANNEL f2 =====  
CPDPRG2 waltz16  
NUC2 1H  
PCPD2 90.00 usec  
PL2 -2.00 dB  
PL12 14.16 dB  
PL13 17.90 dB  
PL2W 11.86359406 W  
PL12W 0.28722104 W  
PL13W 0.12139934 W  
SFO2 400.2216009 MHz  
SI 32768  
SF 100.6353990 MHz  
WDW EM  
SSB 0  
LB 1.00 Hz  
GB 0  
PC 1.40

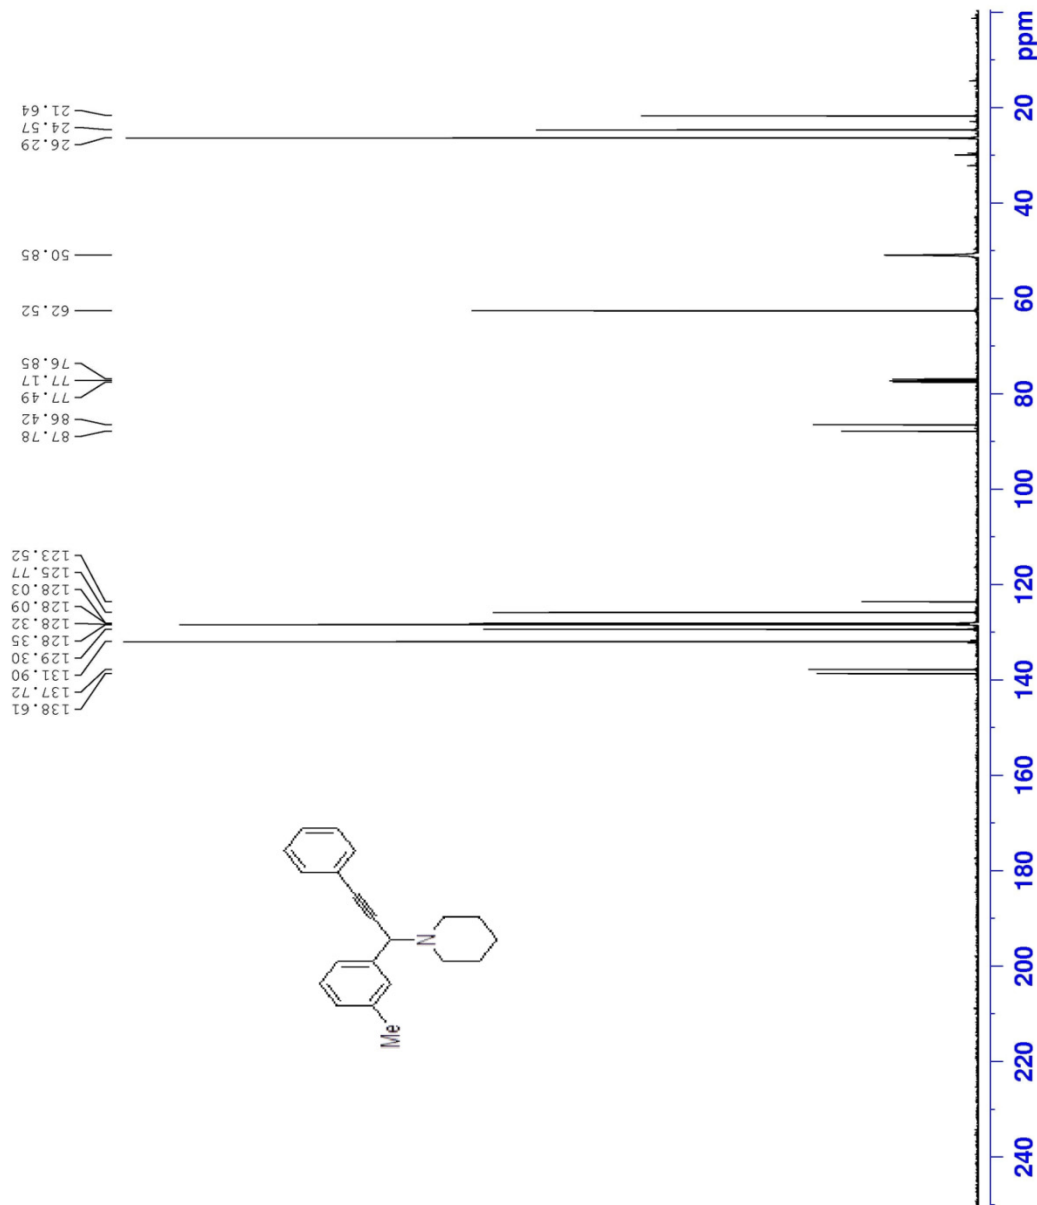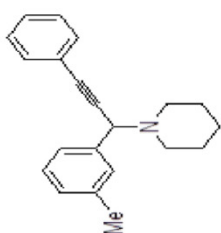

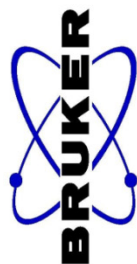

Dr.Gholi nejad  
NAME EXPNO 51  
PROCNO 1  
Date\_ 20111128  
Time 11.11  
INSTRUM spect  
PROBHD 5 mm PABBO BB-  
PULPROG zg30  
TD 65536  
SOLVENT CDCl3  
NS 24  
DS 0  
SWH 8012.820 Hz  
FIDRES 0.122266 Hz  
AQ 4.0894966 sec  
RG 456  
DW 62.400 usec  
DE 6.50 usec  
TE 296.3 K  
D1 6.00000000 sec  
TD0 1  
===== CHANNEL f1 =====  
NUC1 1H  
P1 14.00 usec  
PL1 -2.00 dB  
PL1W 11.86359406 W  
SF01 400.22336020 MHz  
SI 32768  
SF 400.22000000 MHz  
WDW EM  
SSB 0  
LB 0.30 Hz  
GB 0  
PC 1.00

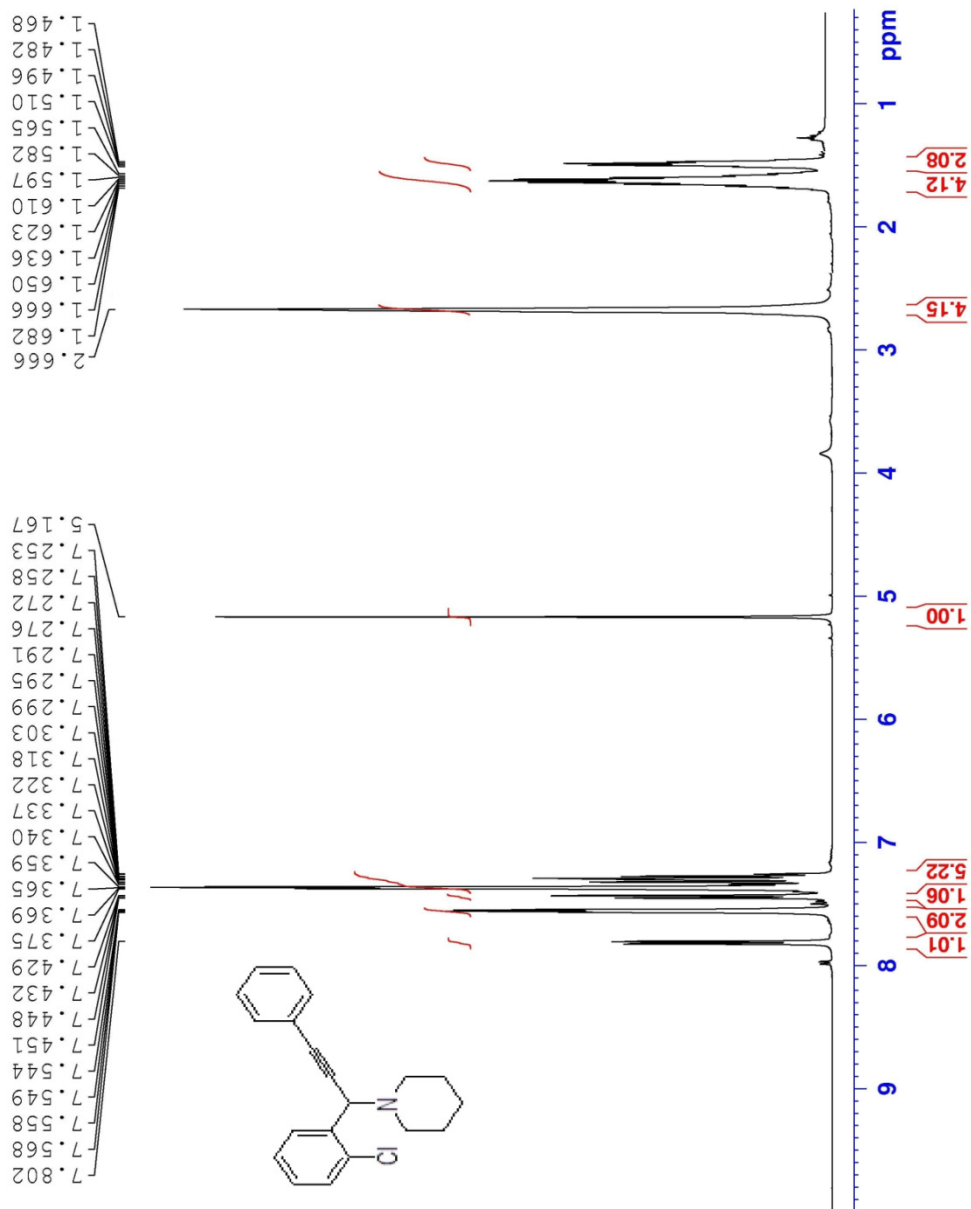



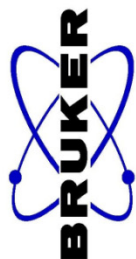

NAME Dr.Gholi nejati  
EXPNO 50  
PROCNO 1  
Date\_ 20111128  
Time 11.15  
INSTRUM spect  
PROBHD 5 mm PABBO BB-  
PULPROG zgpg  
TD 65536  
SOLVENT CDC13  
NS 76  
DS 0  
SWH 25252.525 Hz  
FIDRES 0.385323 Hz  
AQ 1.2976629 sec  
RG 2050  
DW 19.800 usec  
DE 6.50 usec  
TE 296.7 K  
D1 3.00000000 sec  
D11 0.03000000 sec  
TD0 1

==== CHANNEL f1 =====  
NUC1 13C  
P1 9.00 usec  
PL1 -0.90 dB  
PL1W 42.02801895 W  
SFO1 100.6479784 MHz

==== CHANNEL f2 =====  
CPDPRG2 waitz16  
NUC2 1H  
P2 90.00 usec  
PCPD2 2.00 dB  
PL2 14.00 dB  
PL2W 14.56 dB  
PL3 17.50 dB  
PL3W 11.86359406 W  
PL4 0.28722104 W  
PL4W 0.12139934 W  
SFO2 400.2216009 MHz  
SI 32768  
SF 100.6353990 MHz  
WDW EM  
SSB 0  
LB 1.00 Hz  
GB 0  
PC 1.40

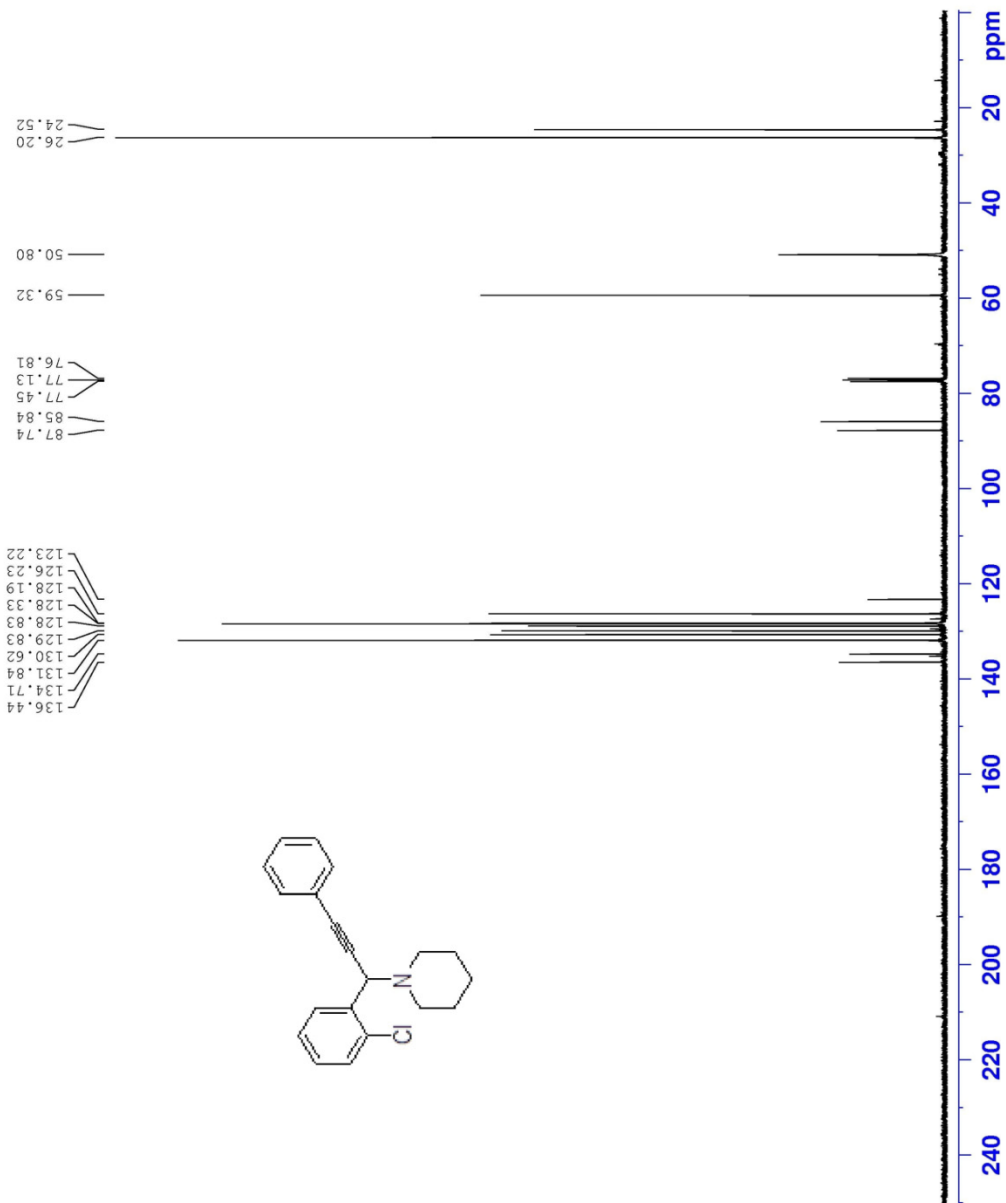

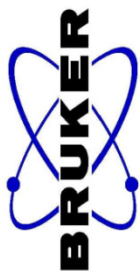

NAME Dr.Choi.i rejad  
EXPNO 53  
PROCNO 1  
Date\_ 20111207  
Time\_ 10.22  
INSTRUM spect  
PROBHD 5 mm PABBO BB-  
PULPROG zg30  
TD 65536  
SOLVENT CDCl3  
NS 14  
DS 0  
SWH 8012.820 Hz  
FIDRES 0.122266 Hz  
AQ 4.0894966 sec  
RG 362  
DW 62.400 usec  
DE 6.50 usec  
TE 296.9 K  
D1 6.00000000 sec  
TD0 1  
===== CHANNEL f1 =====  
NUC1 1H  
P1 14.00 usec  
PL1 -2.00 dB  
PL1W 11.86359406 W  
SF01 400.2236020 MHz  
SI 32768  
SF 400.2200000 MHz  
WDW EM  
SSB 0  
LB 0.30 Hz  
GB 0  
PC 1.00

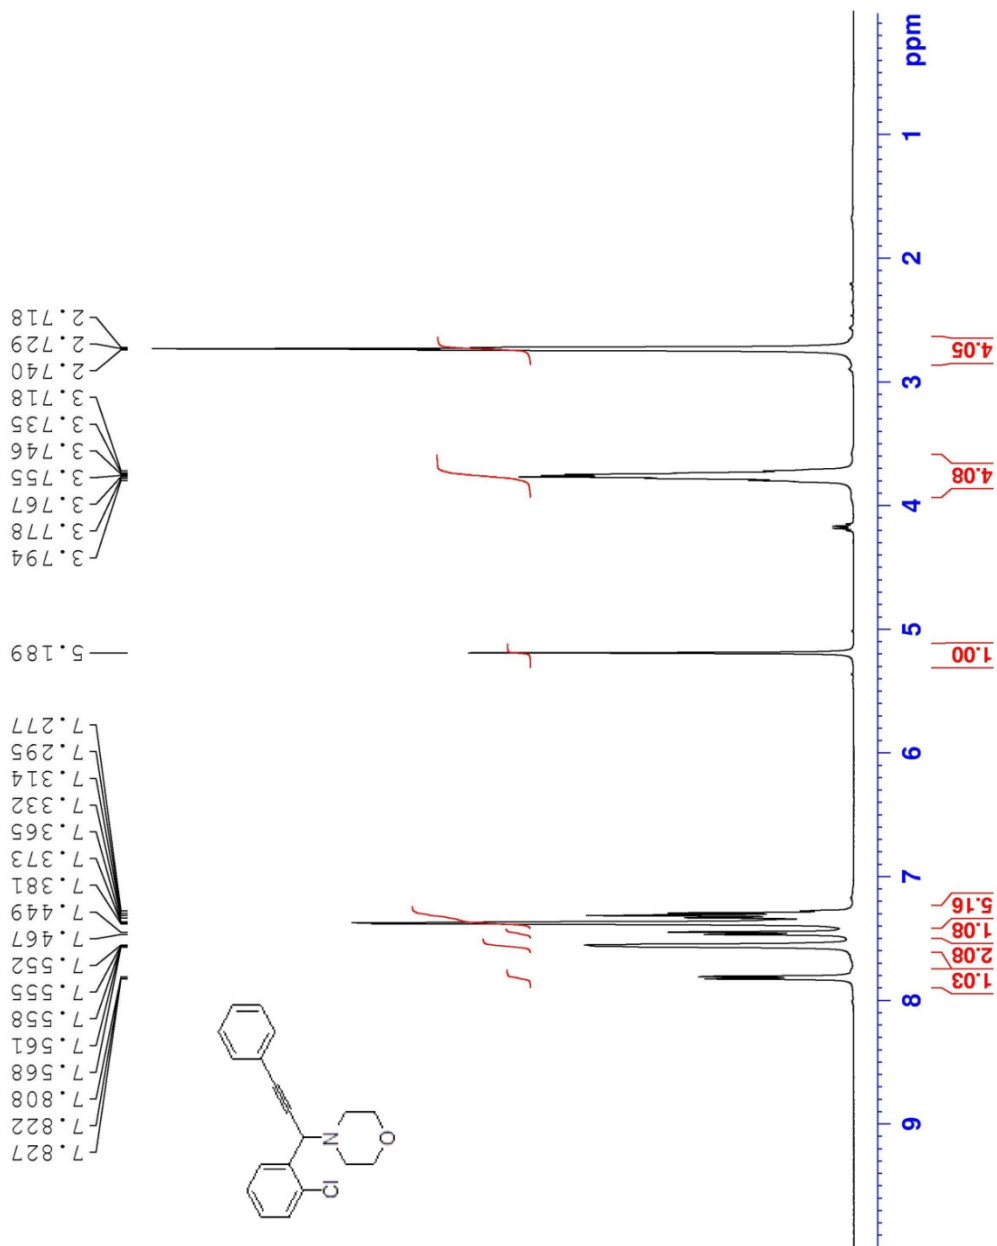

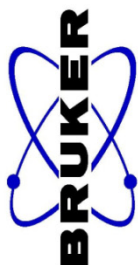

NAME Dr.Gholi nejad  
EXPNO 52  
PROCNO 1  
Date\_ 20111207  
Time\_ 10:23  
INSTRUM spect  
PROBHD 5 mm PABBO BB-  
PULPROG zgpg9  
TD 65536  
SOLVENT CDCl3  
NS 50  
DS 0  
SWH 25252.525 Hz  
FIDRES 0.385323 Hz  
AQ 1.2976629 sec  
RG 2050  
DW 19.800 usec  
DE 6.50 usec  
TE 296.9 K  
D1 3.0000000 sec  
D11 0.0300000 sec  
TD0 1

==== CHANNEL f1 =====  
NUC1 13C  
P1 9.00 usec  
PL1 -0.90 dB  
PL1W 42.02801895 W  
SFO1 100.6479784 MHz

==== CHANNEL f2 =====  
CPDPRG2 waltz16  
NUC2 1H  
PCPD2 90.00 usec  
PL2 -2.00 dB  
PL12 14.16 dB  
PL13 17.90 dB  
PL2W 11.86359406 W  
PL12W 0.28722104 W  
PL13W 0.12139934 W  
SFO2 400.2216009 MHz  
SI 32768  
SF 100.6353990 MHz  
WDW EM  
SSB 0  
LB 1.00 Hz  
GB 0  
PC 1.40

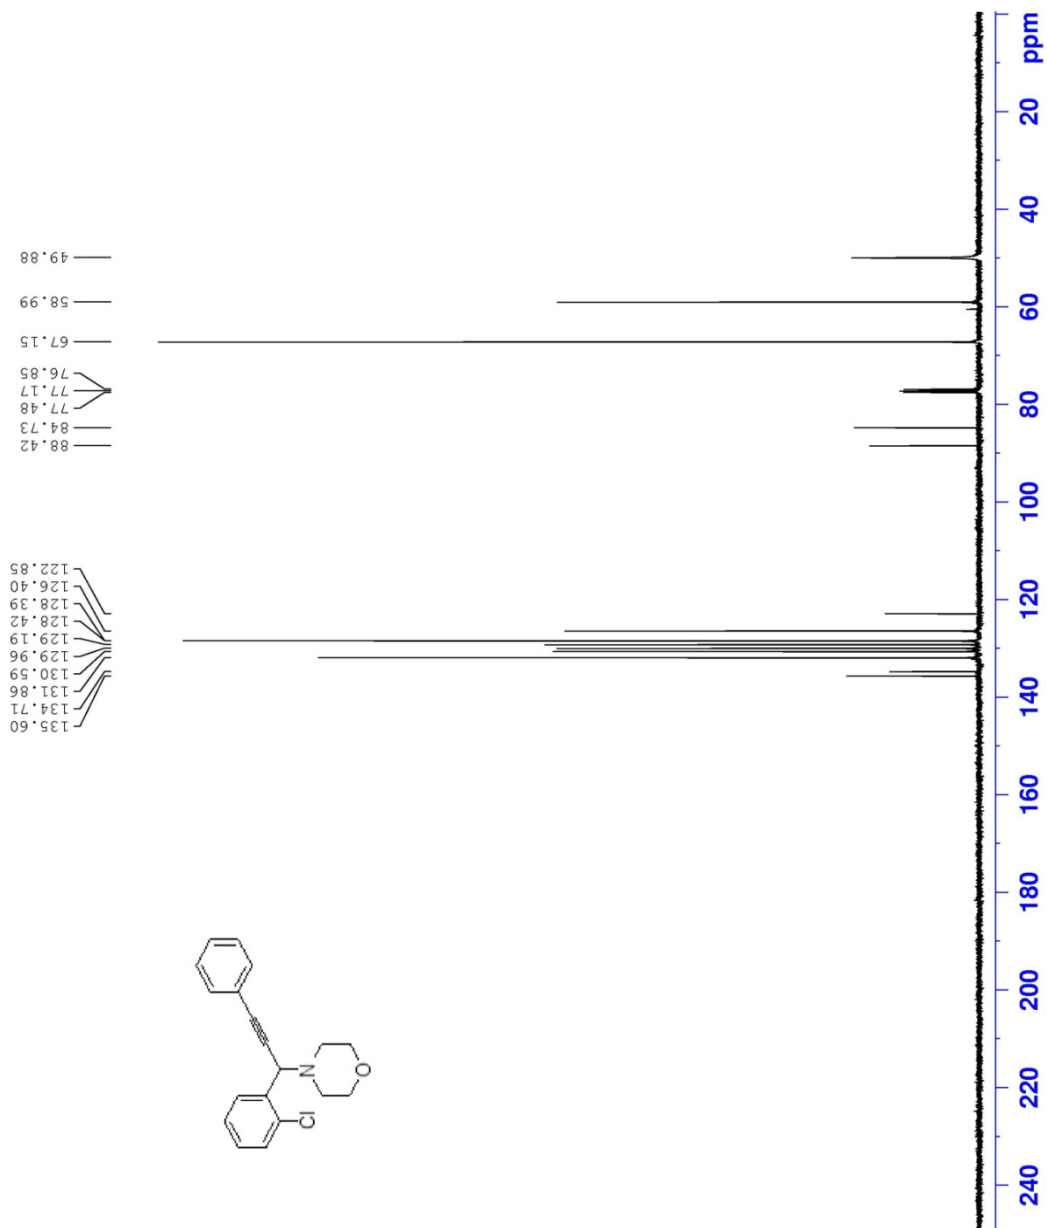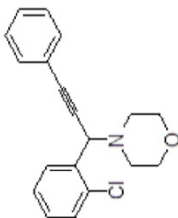

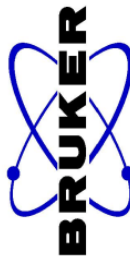

NAME Dr.Gholi nejad  
EXPNO 163  
PROCNO 1  
Date\_ 20120305  
Time 17.48  
INSTRUM spect  
PROBHD 5 mm PABBO BB-  
PULPROG zg30  
TD 65336  
SOLVENT CDCl3  
NS 8  
DS 0  
SWH 8012.820 Hz  
FIDRES 0.122266 Hz  
AQ 4.0894966 sec  
RG 2050  
DW 62.400 usec  
DE 6.50 usec  
TE 295.7 K  
D1 6.0000000 sec  
TD0 1  
===== CHANNEL f1 =====  
NUC1 1H  
P1 14.00 usec  
PL1 2.00 dB  
PL1W 11.86359406 W  
SF01 400.2236020 MHz  
SI 32768  
SF 400.2200000 MHz  
WDW EM  
SSB 0  
LB 0.30 Hz  
GB 0  
PC 1.00

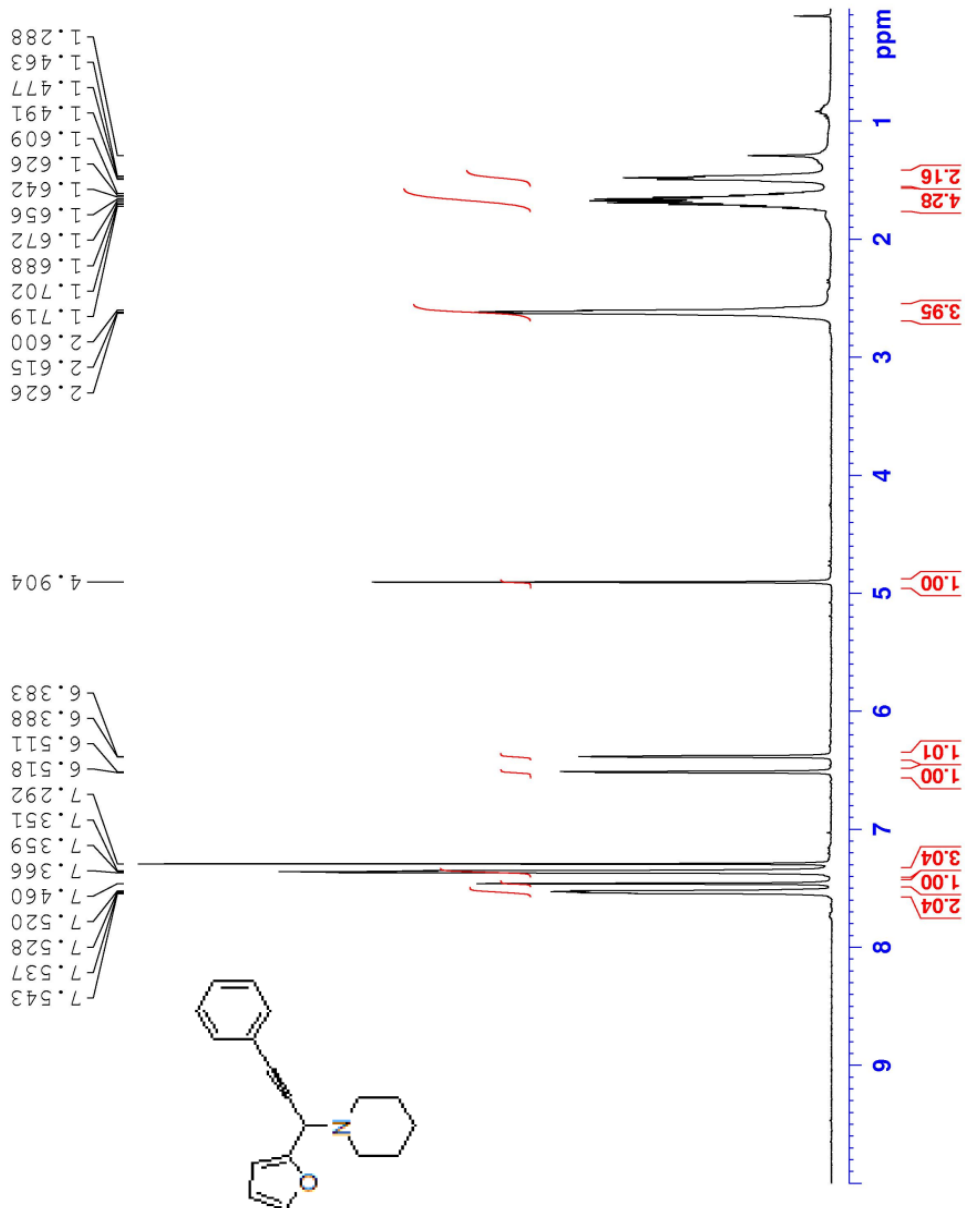

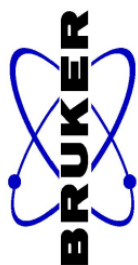

NAME Dr.Gholi nejad  
EXPNO 162  
PROCNO 1  
Date\_ 20120305  
Time\_ 17.49  
INSTRUM spect  
PROBHD 5 mm PABBO BB-  
PULPROG zgpg  
TD 65536  
SOLVENT CDC13  
NS 132  
DS 0  
SWH 25252.525 Hz  
FIDRES 0.385323 Hz  
AQ 1.2976629 sec  
RG 2050  
DW 19.800 usec  
DE 6.50 usec  
TE 295.8 K  
D1 3.00000000 sec  
D11 0.03000000 sec  
TD0 1

=====  
CHANNEL f1  
NUC1 13C  
P1 9.00 usec  
PL1 -0.90 dB  
PL1W 42.02801895 W  
SF01 100.6479784 MHz

=====  
CHANNEL f2  
CPDPRG2 waltz16  
NUC2 1H  
PCPD2 90.00 usec  
PL2 -2.00 dB  
PL12 14.16 dB  
PL13 17.90 dB  
PL2W 11.86359406 W  
PL12W 0.28722104 W  
PL13W 0.12139934 W  
SF02 400.2216009 MHz  
SI 32768  
SF 100.6353990 MHz  
WDW EM  
SSB 0  
LB 1.00 Hz  
GB 0  
PC 1.40

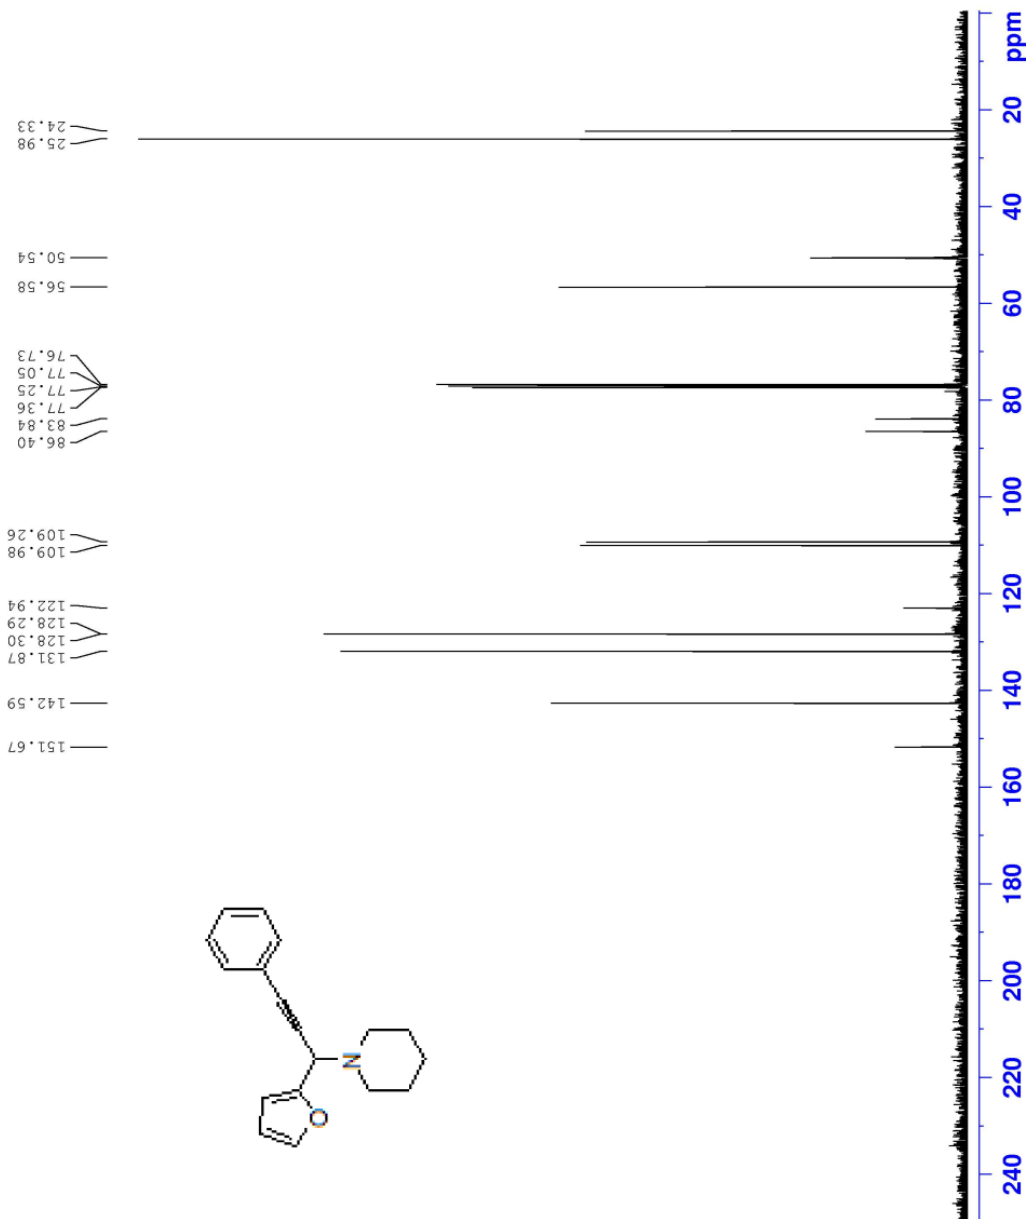

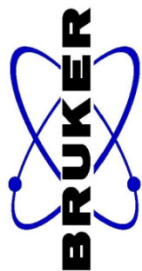

Dr.Gholi nejad  
NAME  
EXPNO 89  
PROCNO 1  
Date\_ 20120128  
Time\_ 16.30  
INSTRUM Spect  
PROBHD 5 mm PABBO BB-  
PULPROG zg30  
TD 65536  
SOLVENT CDCl3  
NS 24  
DS 0  
SWH 8012.820 Hz  
FIDRES 0.122266 Hz  
AQ 4.0894966 sec  
RG 2050  
DM 62.400 usec  
DE 6.50 usec  
TE 295.8 K  
D1 6.00000000 sec  
TD0 1  
===== CHANNEL f1 =====  
NUC1 1H  
P1 14.00 usec  
PL1 -2.00 dB  
PL1W 11.86359406 W  
SF01 400.2236020 MHz  
SI 32768  
SF 400.2200000 MHz  
WDW EM  
SSB 0  
LB 0.30 Hz  
GB 0  
PC 1.00

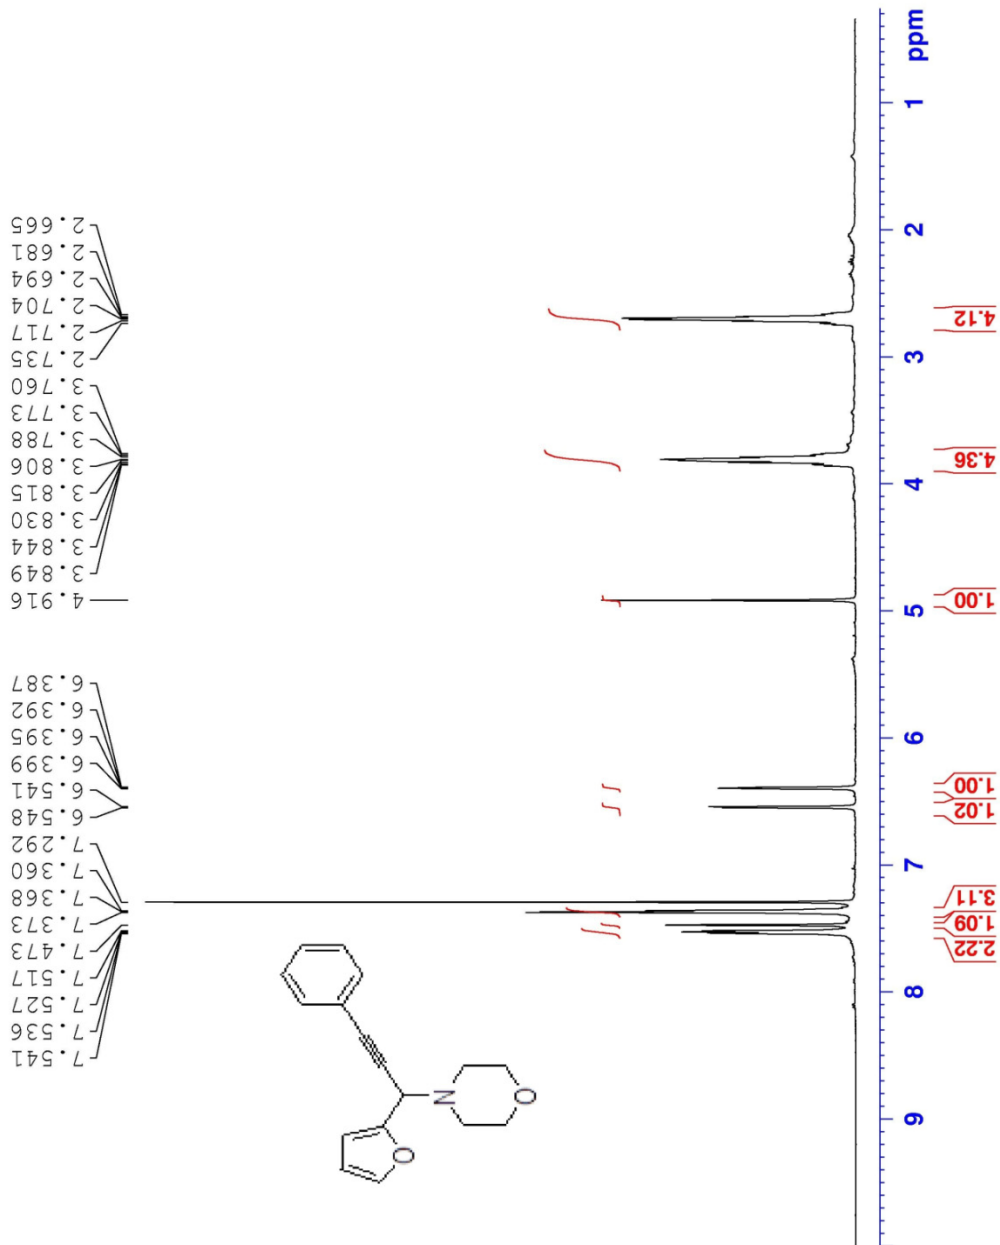

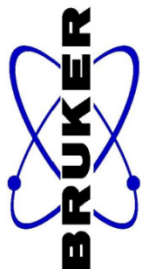

Dr.Gholi nejad  
NAME  
EXPNO 1  
PROCNO 88  
Date\_ 20120128  
Time 16.32  
INSTRUM spect  
PROBHD 5 mm PABBO BB-  
PULPROG zgpg  
TD 65536  
SOLVENT CDCl3  
NS 240  
DS 0  
SWH 25252.525 Hz  
FIDRES 0.385323 Hz  
AQ 1.2976629 sec  
RG 2050  
DW 19.800 usec  
DE 6.50 usec  
TE 296.1 K  
D1 3.0000000 sec  
D11 0.0300000 sec  
TD0 1

==== CHANNEL f1 =====  
NUC1 13C  
P1 9.00 usec  
PL1 -0.90 dB  
PL1W 42.02801895 W  
SF01 100.6479784 MHz

==== CHANNEL f2 =====  
CPDPRG2 waltz16  
NUC2 1H  
PCPD2 90.00 usec  
PL2 -2.00 dB  
PL12 14.16 dB  
PL13 17.90 dB  
PL2W 11.86359406 W  
PL12W 0.28722104 W  
PL13W 0.12139934 W  
SF02 400.2216009 MHz  
SI 32768  
SF 100.6353990 MHz  
WDW EM  
SSB 0  
LB 1.00 Hz  
GB 0  
PC 1.40

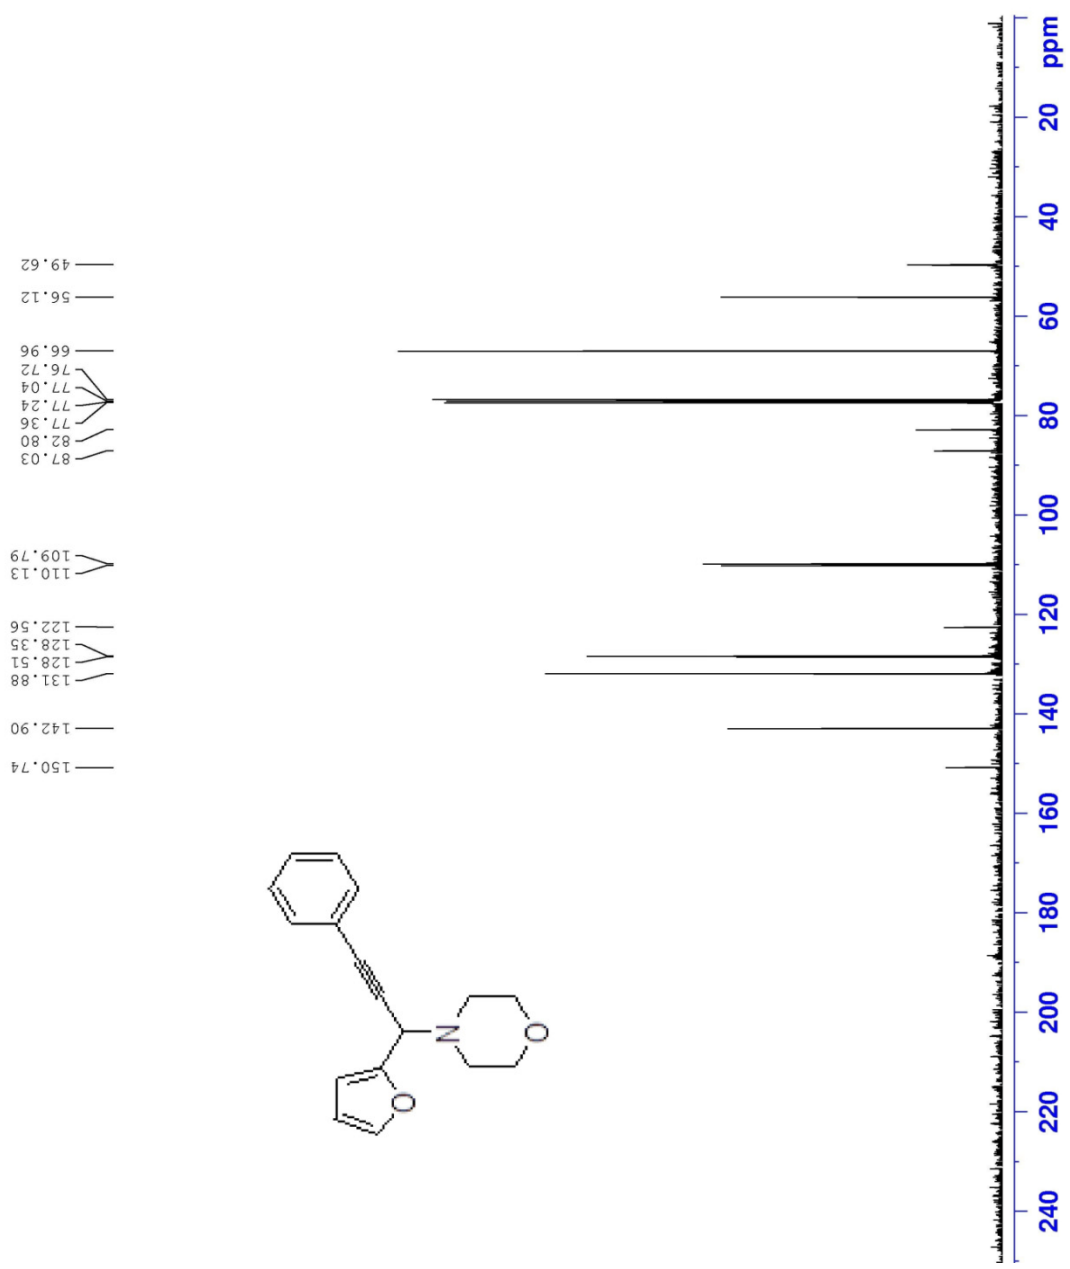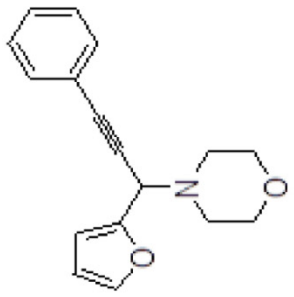

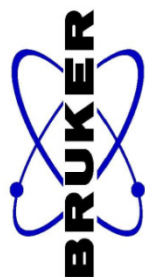

Dr.Gholi nejad  
NAME  
EXPNO 38  
PROCNO 1  
Date\_ 20111114  
Time 11.16  
INSTRUM spect  
PROBHD 5 mm PABBO BB-  
PULPROG zg30  
TD 65536  
SOLVENT CDCl3  
NS 24  
DS 0  
SWH 8012.820 Hz  
FIDRES 0.122266 Hz  
AQ 4.0894966 sec  
RG 362  
DW 62.400 usec  
DE 6.50 usec  
TE 297.0 K  
D1 6.00000000 sec  
TD0 1  
===== CHANNEL f1 =====  
NUC1 1H  
P1 14.00 usec  
PL -2.00 dB  
PL1W 11.86359406 W  
SFO1 400.2236020 MHz  
SI 32768  
SF 400.2200000 MHz  
WDW EM  
SSB 0  
LB 0.30 Hz  
GB 0  
PC 1.00

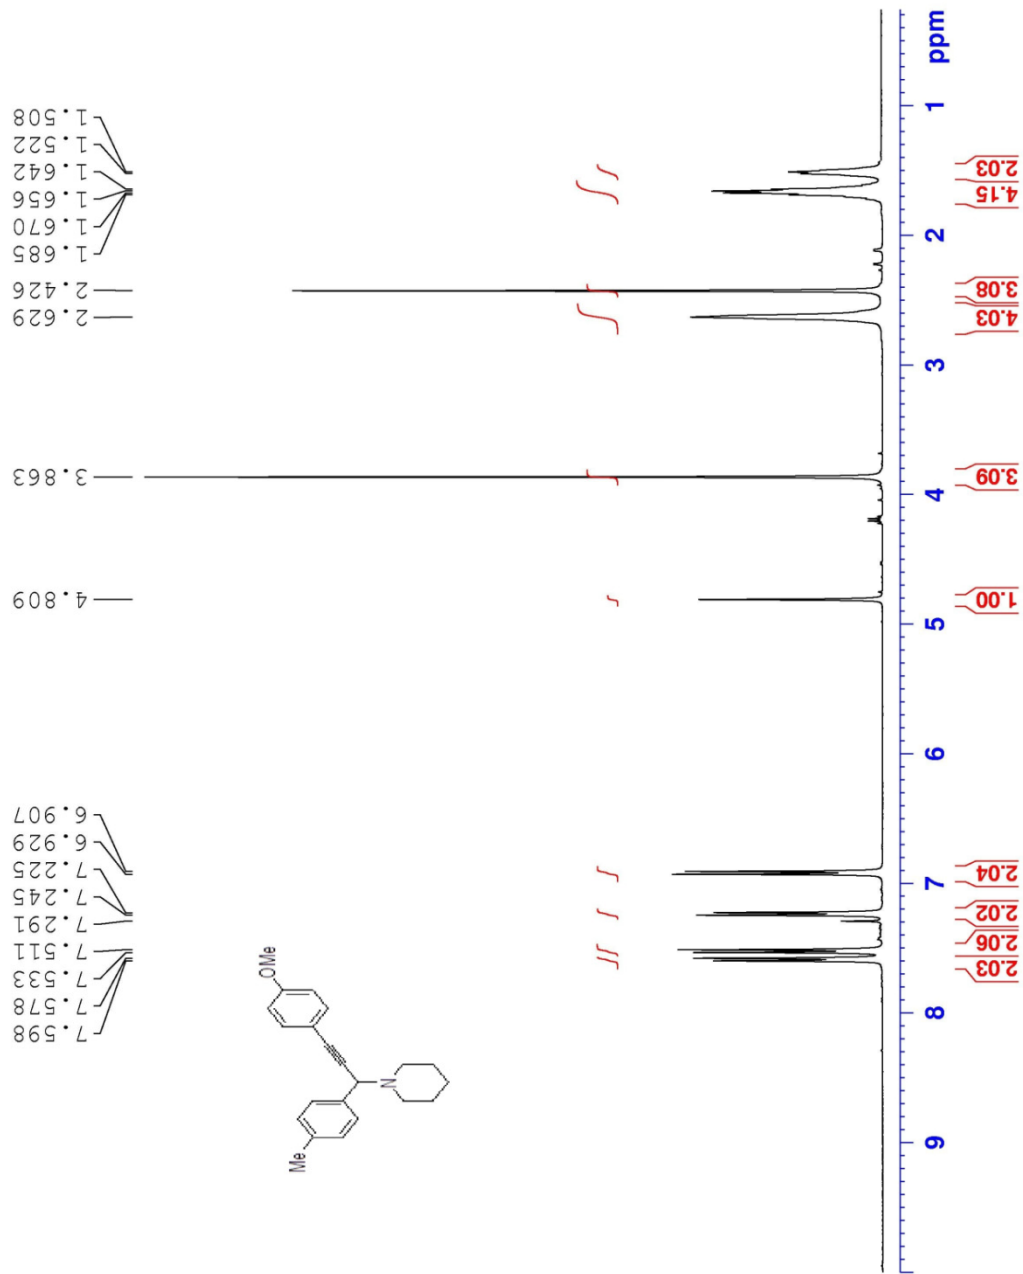



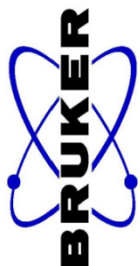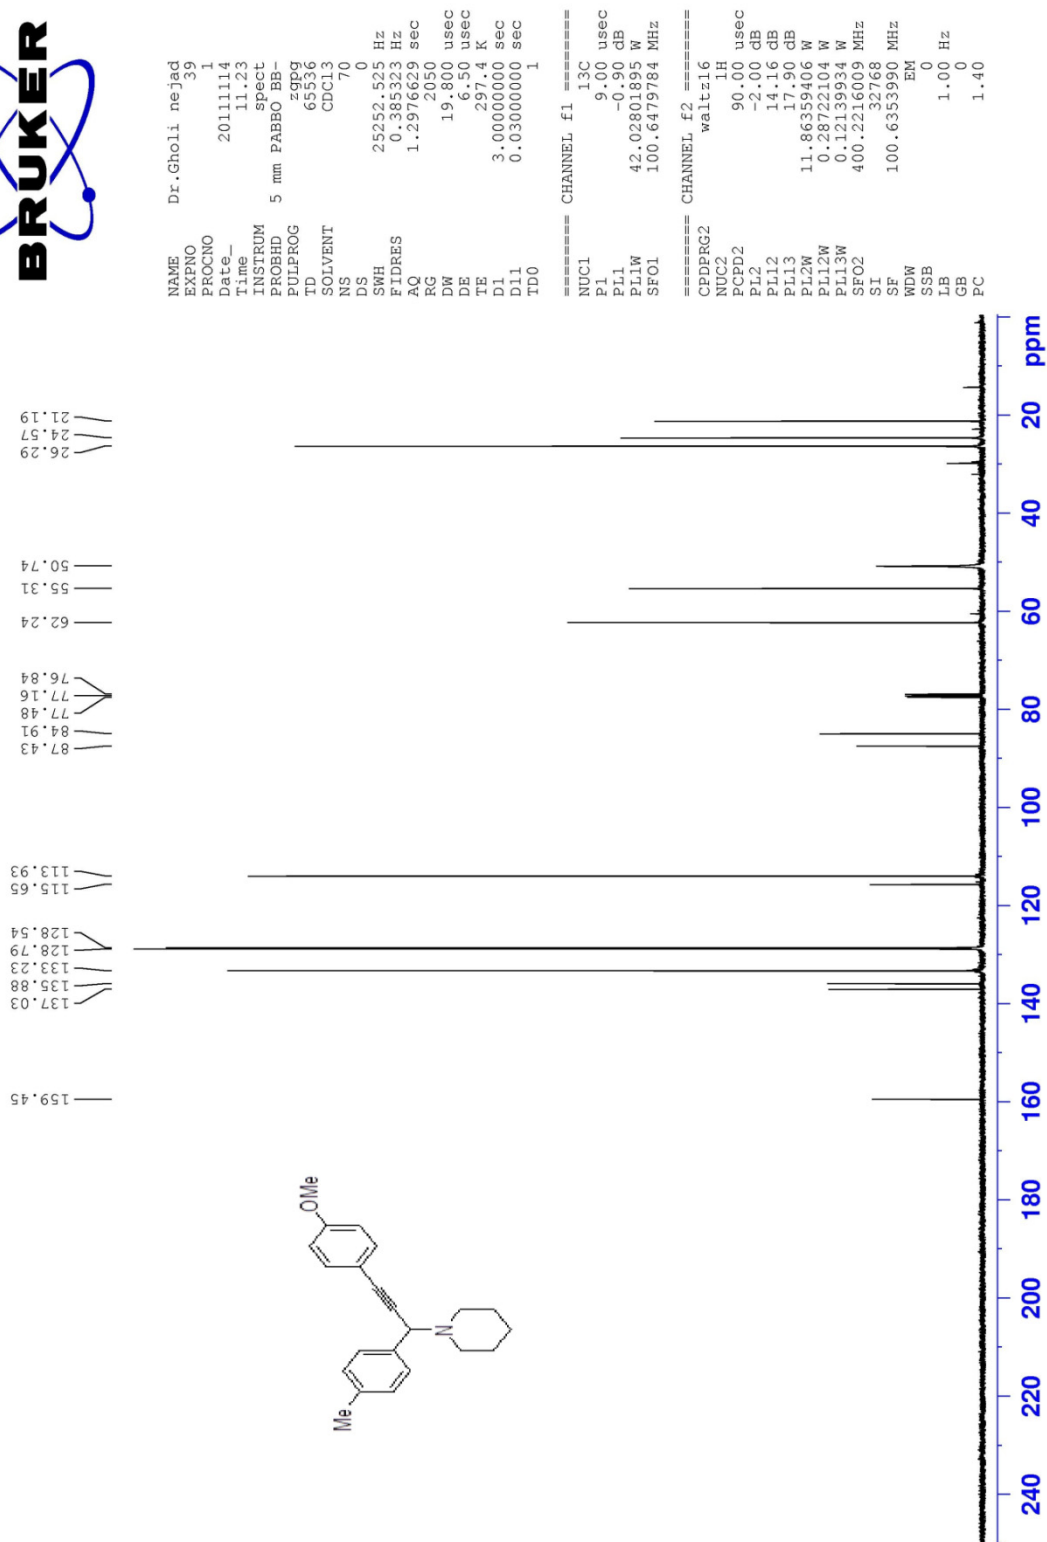

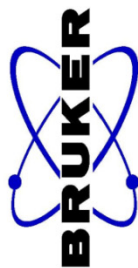

NAME Dr.Gholi nejad  
EXPNO 22  
PROCNO 1  
Date\_ 20111029  
Time 11.24  
INSTRUM spect  
PROBHD 5 mm PABBO BB-  
PULPROG zg30  
TD 65536  
SOLVENT CDC13  
NS 24  
DS 0  
SWH 8012.820 Hz  
FIDRES 0.122266 Hz  
AQ 4.0894966 sec  
RG 406  
DW 62.400 usec  
DE 6.50 usec  
TE 294.3 K  
D1 6.00000000 sec  
TD0 1  
===== CHANNEL f1 =====  
NUC1 1H  
P1 14.00 usec  
PL1 -2.00 dB  
PL1W 11.86359406 W  
SF01 400.2236020 MHz  
SI 32768  
SF 400.2200000 MHz  
EM  
WDW 0  
SSB 0  
LB 0.30 Hz  
GB 0  
PC 1.00

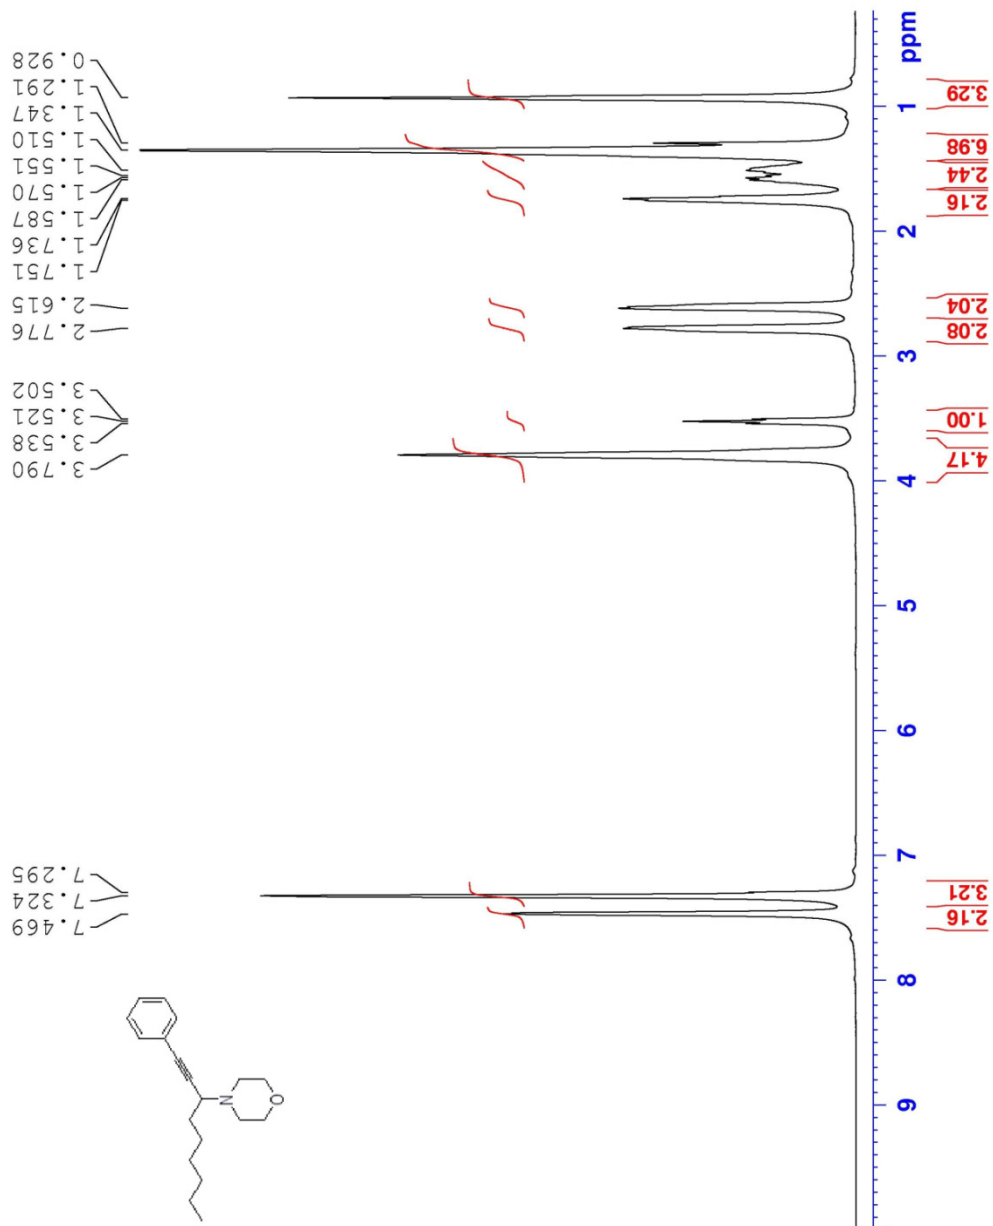

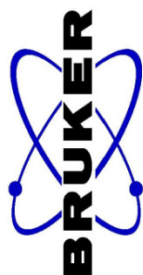

Dr. Gholi nejad  
NAME  
EXPNO 22  
PROCNO 1  
Date\_ 20111029  
Time 11.24  
INSTRUM spect  
PROBHD 5 mm PABBO BE-  
PULPROG zg30  
TD 65536  
SOLVENT CDCl3  
NS 24  
DS 0  
SWH 8012.820 Hz  
FIDRES 0.122266 Hz  
AQ 4.0894966 sec  
RG 406  
DW 62.400 usec  
DE 6.50 usec  
TE 294.3 K  
D1 6.00000000 sec  
TD0 1  
===== CHANNEL f1 =====  
NUC1 1H  
P1 14.00 usec  
PL1 -2.00 dB  
PL1W 11.86359406 W  
SF01 400.2236020 MHz  
SI 32768  
SF 400.2200000 MHz  
WDW EM  
SSB 0  
LB 0.30 Hz  
GB 0  
PC 1.00

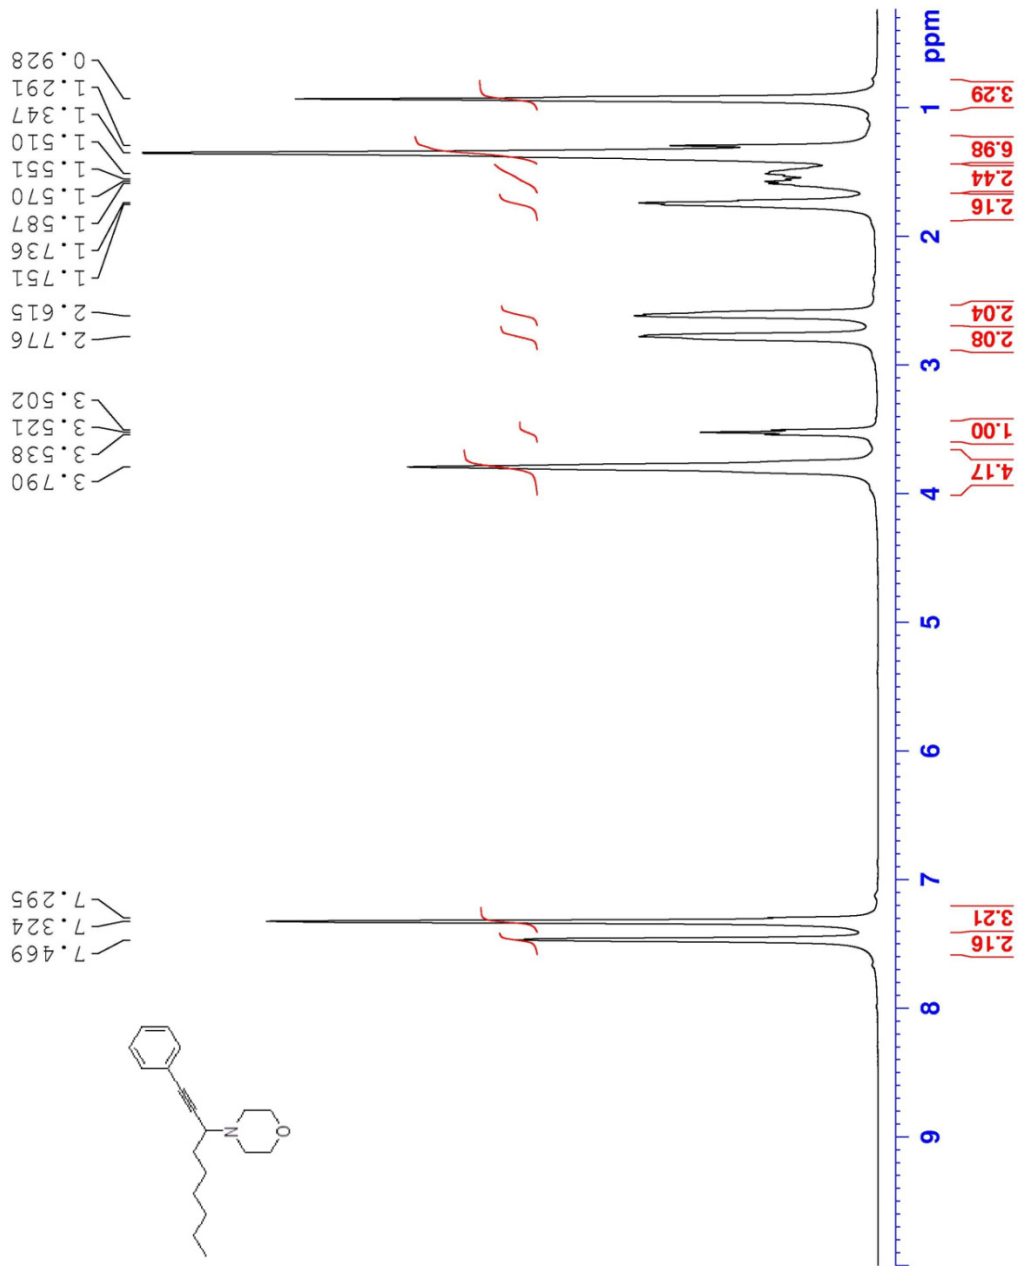

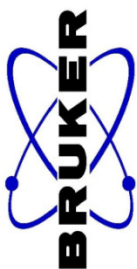

NAME Dr.Gholi nejad  
EXENO Z1  
PROCNO 1  
Date\_ 201111029  
Time\_ 11.27  
INSTRUM spect  
PROBHD 5 mm PABBO BB-  
PULPROG zgpg  
TD 65536  
SOLVENT CDCl3  
NS 120  
DS 0  
SWH 25252.525 Hz  
FIDRES 0.385323 Hz  
AQ 1.2976629 sec  
RG 2050  
DW 19.800 usec  
DE 6.50 usec  
TE 294.5 K  
D1 3.00000000 sec  
D11 0.03000000 sec  
TD0 1

==== CHANNEL f1 =====  
NUC1 13C  
P1 9.00 usec  
PL1 -0.90 dB  
PL1W 42.02801895 W  
SF01 100.6479784 MHz

==== CHANNEL f2 =====  
CPDPRG2 waltz16  
NUC2 1H  
PCPD2 90.00 usec  
PL2 -2.00 dB  
PL12 14.16 dB  
PL13 17.90 dB  
PL2W 11.86359406 W  
PL12W 0.28722104 W  
PL13W 0.12139934 W  
SFO2 400.2216009 MHz  
SI 32768  
SF 100.6353990 MHz  
WDW EM  
SSB 0  
LB 1.00 Hz  
GB 0  
PC 1.40

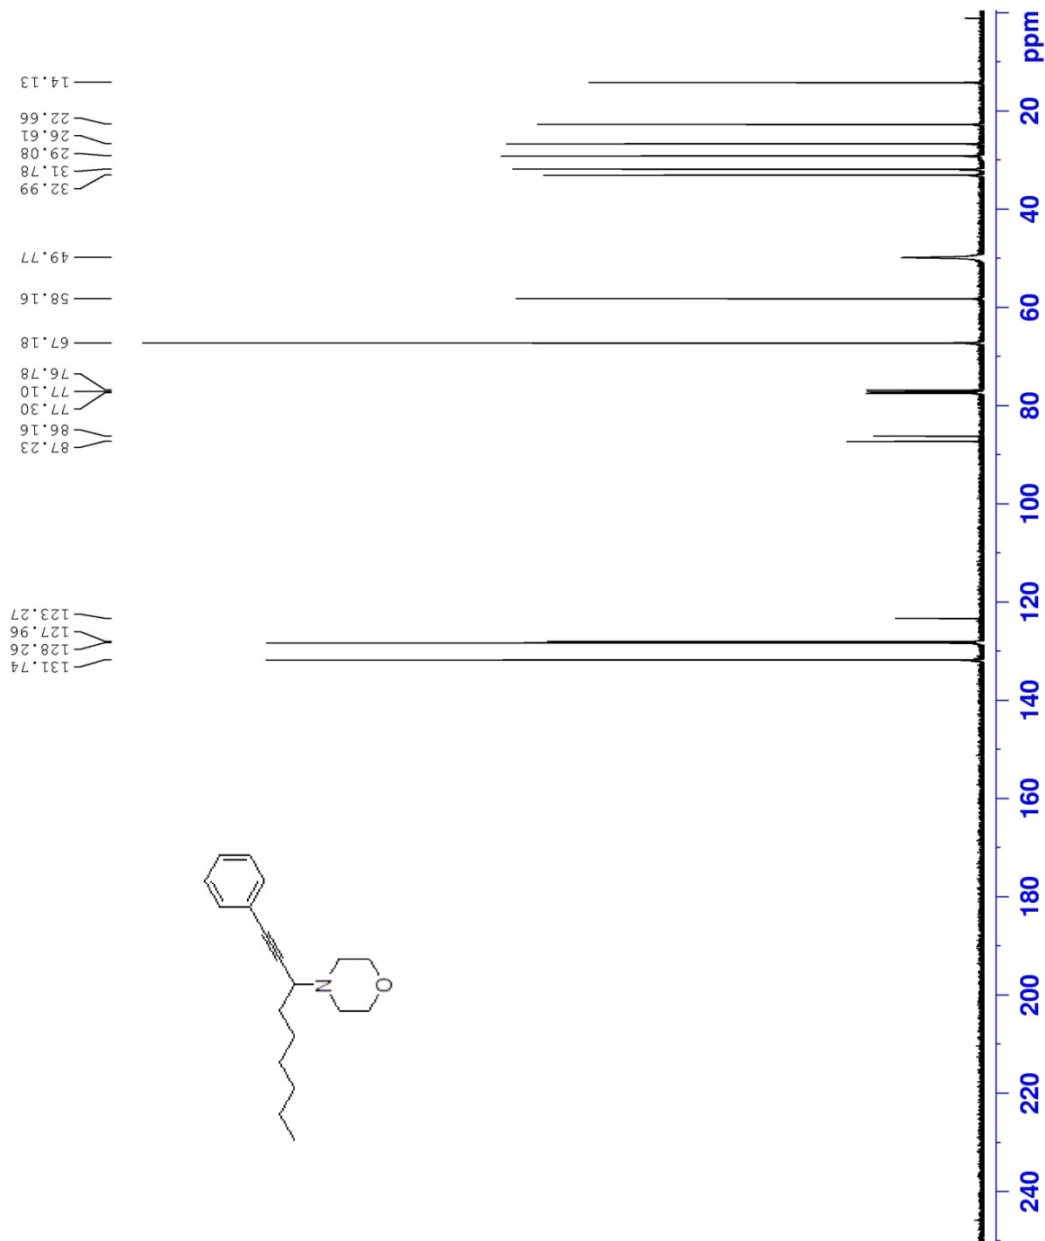

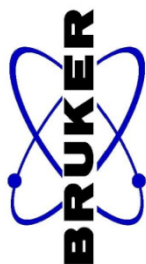

NAME Dr.Gholi nejad

EXPNO 30

PROCNO 1

Date\_ 20111102

Time\_ 11.32

INSTRUM spect

PROBHD 5 mm PABBO BB-

PULPROG zg30

TD 65536

SOLVENT CDCl3

NS 24

DS 0

SWH 8012.820 Hz

FIDRES 0.122266 Hz

AQ 4.0894966 sec

RG 1030

DW 62.400 usec

DE 6.50 usec

TE 297.9 K

D1 6.00000000 sec

TD0 1

==== CHANNEL f1 =====

NUC1 1H

F1 14.00 usec

PL1 -2.00 dB

PL1W 11.86359406 W

SFO1 400.2236020 MHz

SI 32768

SF 400.2200000 MHz

WDW EM

SSB 0

LB 0.30 Hz

GB 0

PC 1.00

7.679  
7.660  
7.501  
7.479  
7.448  
7.439  
7.410  
7.392  
7.373  
7.337  
7.319  
7.292  
6.905  
6.883  
4.813  
3.854  
2.593  
2.426  
1.667  
1.652  
1.637  
1.622  
1.608  
1.490  
1.476  
1.301

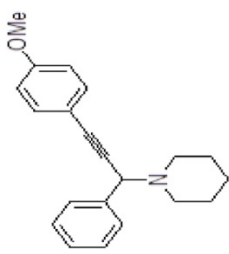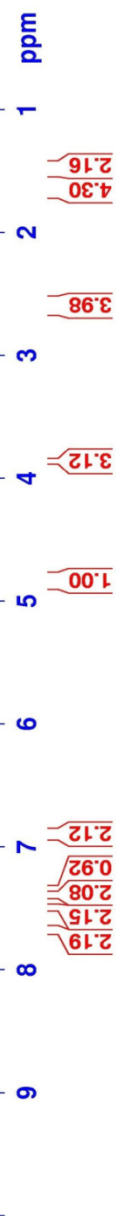

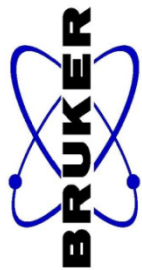

NAME Dr.Gholi nejad  
EXPNO 29  
PROCNO 1  
Date\_ 20111102  
Time\_ 11:35  
INSTRUM spect  
PROBHD 5 mm PABBO BB-  
PULPROG zgpg  
TD 65536  
SOLVENT CDC13  
NS 100  
DS 0  
SWH 25252.525 Hz  
FIDRES 0.385323 Hz  
AQ 1.2976629 sec  
RG 2050  
DW 19.800 usec  
DE 6.50 usec  
TE 298.3 K  
D1 3.00000000 sec  
D11 0.03000000 sec  
TD0 1

==== CHANNEL f1 =====  
NUC1 13C  
P1 9.00 usec  
PL1 -0.90 dB  
PL1W 42.02801895 W  
SFO1 100.6479784 MHz

==== CHANNEL f2 =====  
CPDPRG2 waltz16  
NUC2 1H  
PCPD2 90.00 usec  
PL2 -2.00 dB  
PL12 14.16 dB  
PL13 17.90 dB  
PL1W 11.86359406 W  
PL12W 0.28722104 W  
PL13W 0.12139934 W  
SFO2 400.2216009 MHz  
SI 32768  
SF 100.6353990 MHz  
WDW EM  
SSB 0  
LB 1.00 Hz  
GB 0  
PC 1.40

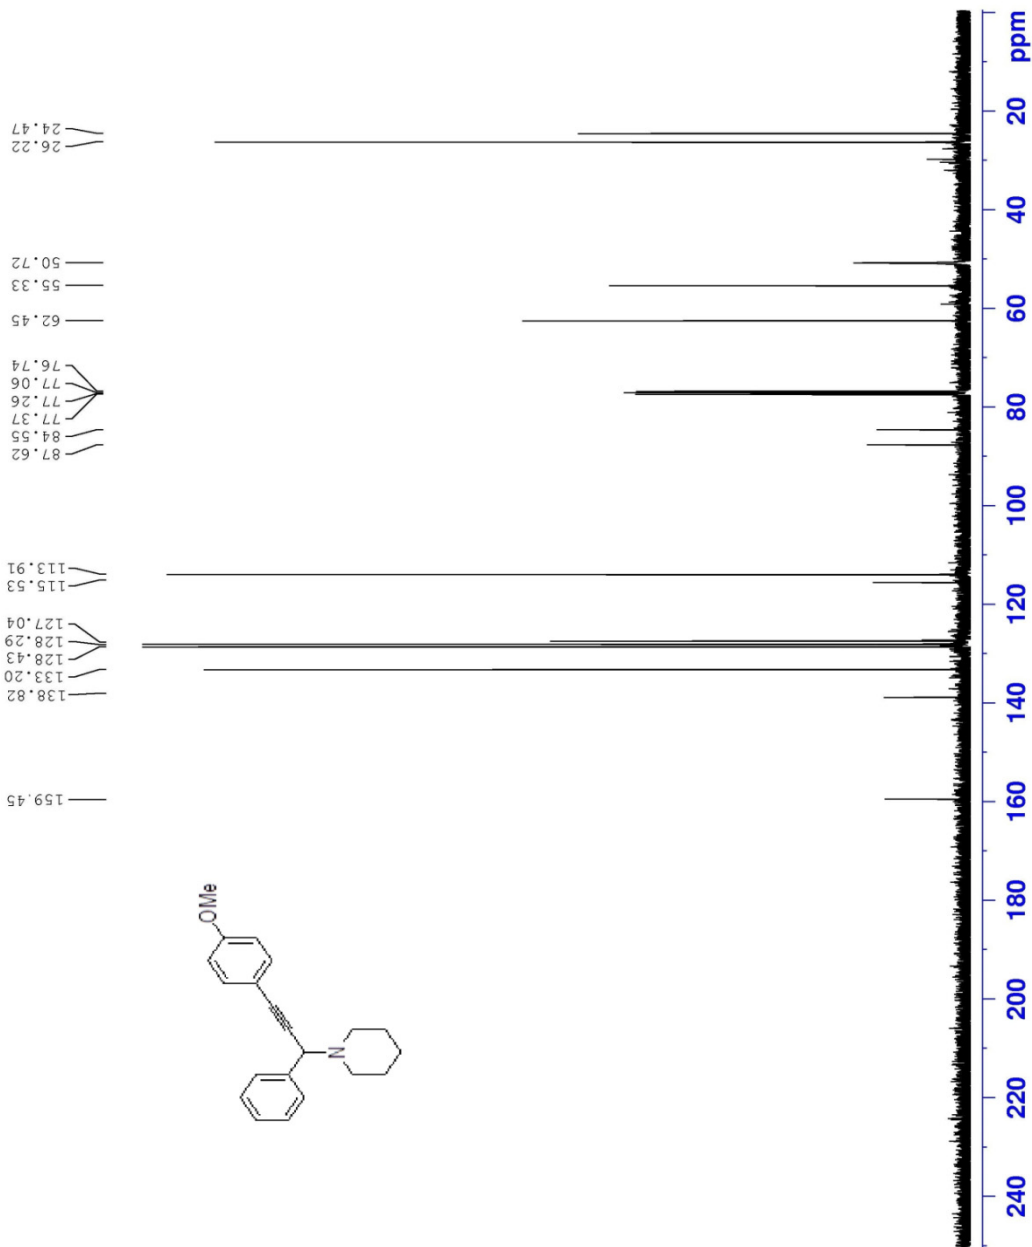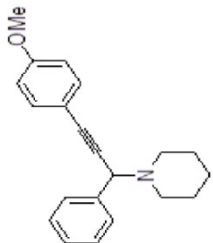

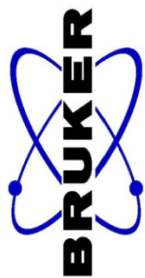

Dr.Gholi nejad  
NAME  
EXPNO 26  
PROCNO 1  
Date\_ 20111031  
Time 14.28  
INSTRUM spect  
PROBHD 5 mm FAPBO BB-  
PULPROG zg30  
TD 65536  
SOLVENT CDC13  
NS 24  
DS 0  
SWH 8012.820 Hz  
FIDRES 0.122266 Hz  
AQ 4.0894966 sec  
RG 144  
DW 62.400 usec  
DE 6.50 usec  
TE 296.2 K  
D1 6.0000000 sec  
TD0 1  
===== CHANNEL f1 =====  
NUC1 IH  
P1 14.00 usec  
PL1 -2.00 dB  
PL1W 11.86359406 W  
SFO1 400.2236020 MHz  
SI 32768  
SF 400.2200000 MHz  
WDW EM  
SSB 0  
LB 0.30 Hz  
GB 0  
PC 1.00

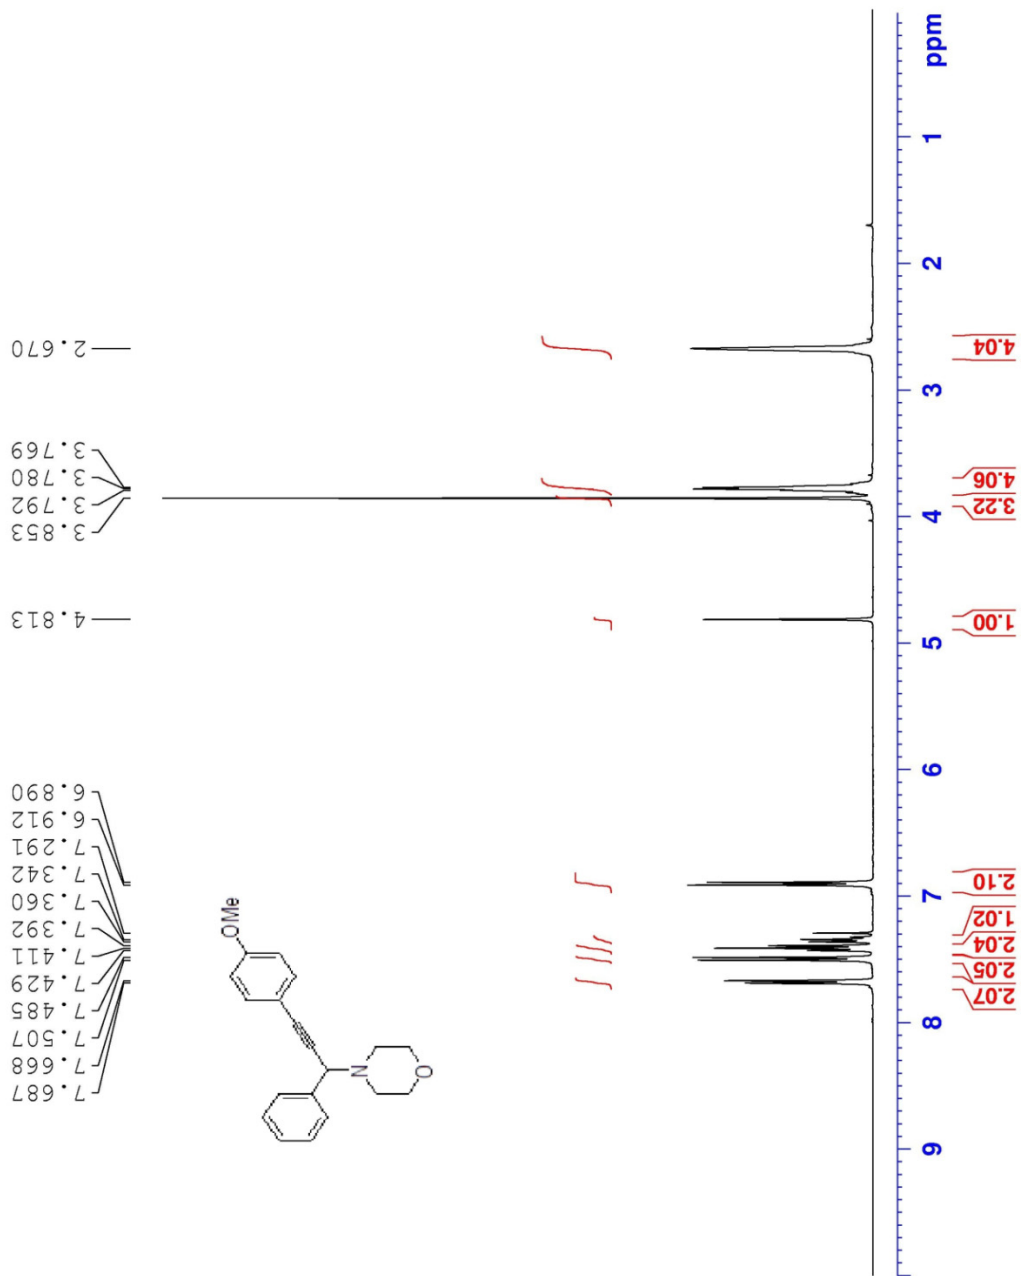

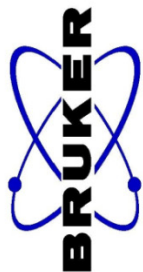

NAME Dr.Gholi nejad  
EXPNO 25  
PROCNO 1  
Date\_ 20111031  
Time 14.37  
INSTRUM spect  
PROBHD 5 mm PABBO BB-  
PULPROG zgpg  
TD 65536  
SOLVENT CDCl3  
NS 160  
DS 0  
SWH 25252.525 Hz  
FIDRES 0.385323 Hz  
AQ 1.2976629 sec  
RG 2050  
DW 19.800 usec  
DE 6.50 usec  
TE 296.6 K  
D1 3.00000000 sec  
D11 0.03000000 sec  
TD0 1

==== CHANNEL f1 =====  
NUC1 13C  
P1 9.00 usec  
PL1 -0.90 dB  
PL1W 42.02801895 W  
SFO1 100.6479784 MHz

==== CHANNEL f2 =====  
CPDPRG2 waltz16  
NUC2 1H  
PCPD2 90.00 usec  
PL2 -2.00 dB  
PL12 14.16 dB  
PL13 17.90 dB  
PL2W 11.86359406 W  
PL12W 0.28722104 W  
PL13W 0.12139934 W  
SFO2 400.2216009 MHz  
SI 32768  
SF 100.6353990 MHz  
WDW EM  
SSB 0  
LB 1.00 Hz  
GB 0  
PC 1.40

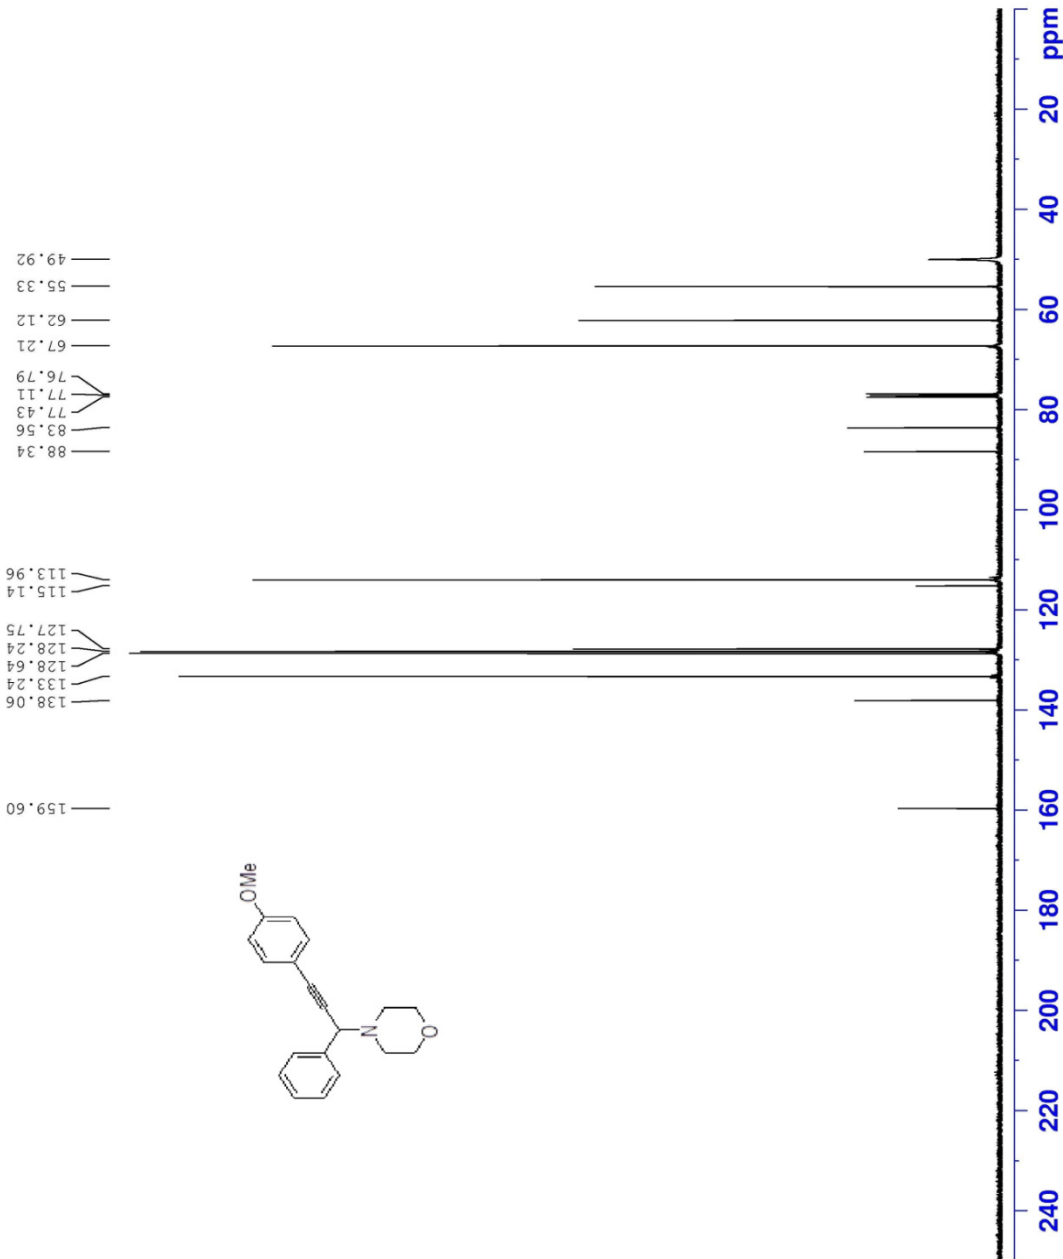



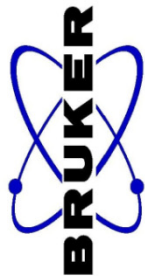

NAME Dr.Gholi nejad  
EXPNO 45  
PROCNO 1  
Date\_ 20111121  
Time 10.50  
INSTRUM spect  
PROBHD 5 mm PABBO BB-  
PULPROG zg30  
TD 65836  
SOLVENT CDCl3  
NS 24  
DS 0  
SWH 8012.820 Hz  
FIDRES 0.122266 Hz  
AQ 4.0894966 sec  
RG 256  
DW 62.400 usec  
DE 6.50 usec  
TE 295.9 K  
D1 6.00000000 sec  
TD0 1

==== CHANNEL f1 =====  
NUC1 1H  
P1 14.00 usec  
PL1 -2.00 dB  
PL1W 11.86359406 W  
SF01 400.2236020 MHz  
SI 32768  
SF 400.2200000 MHz  
WDW EM  
SSB 0  
LB 0.30 Hz  
GB 0  
PC 1.00

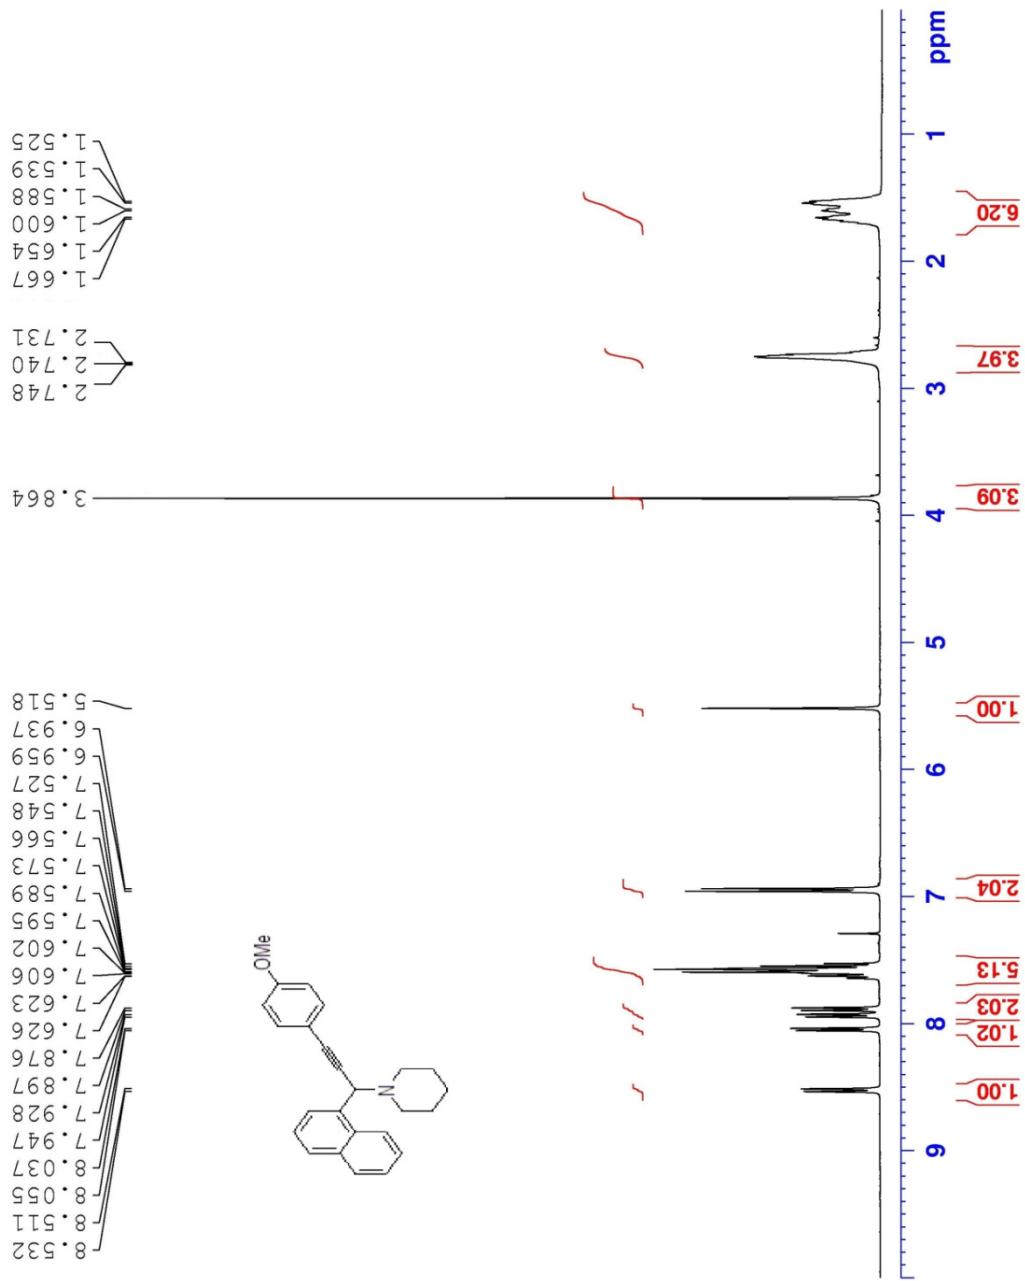

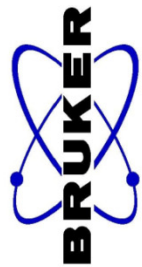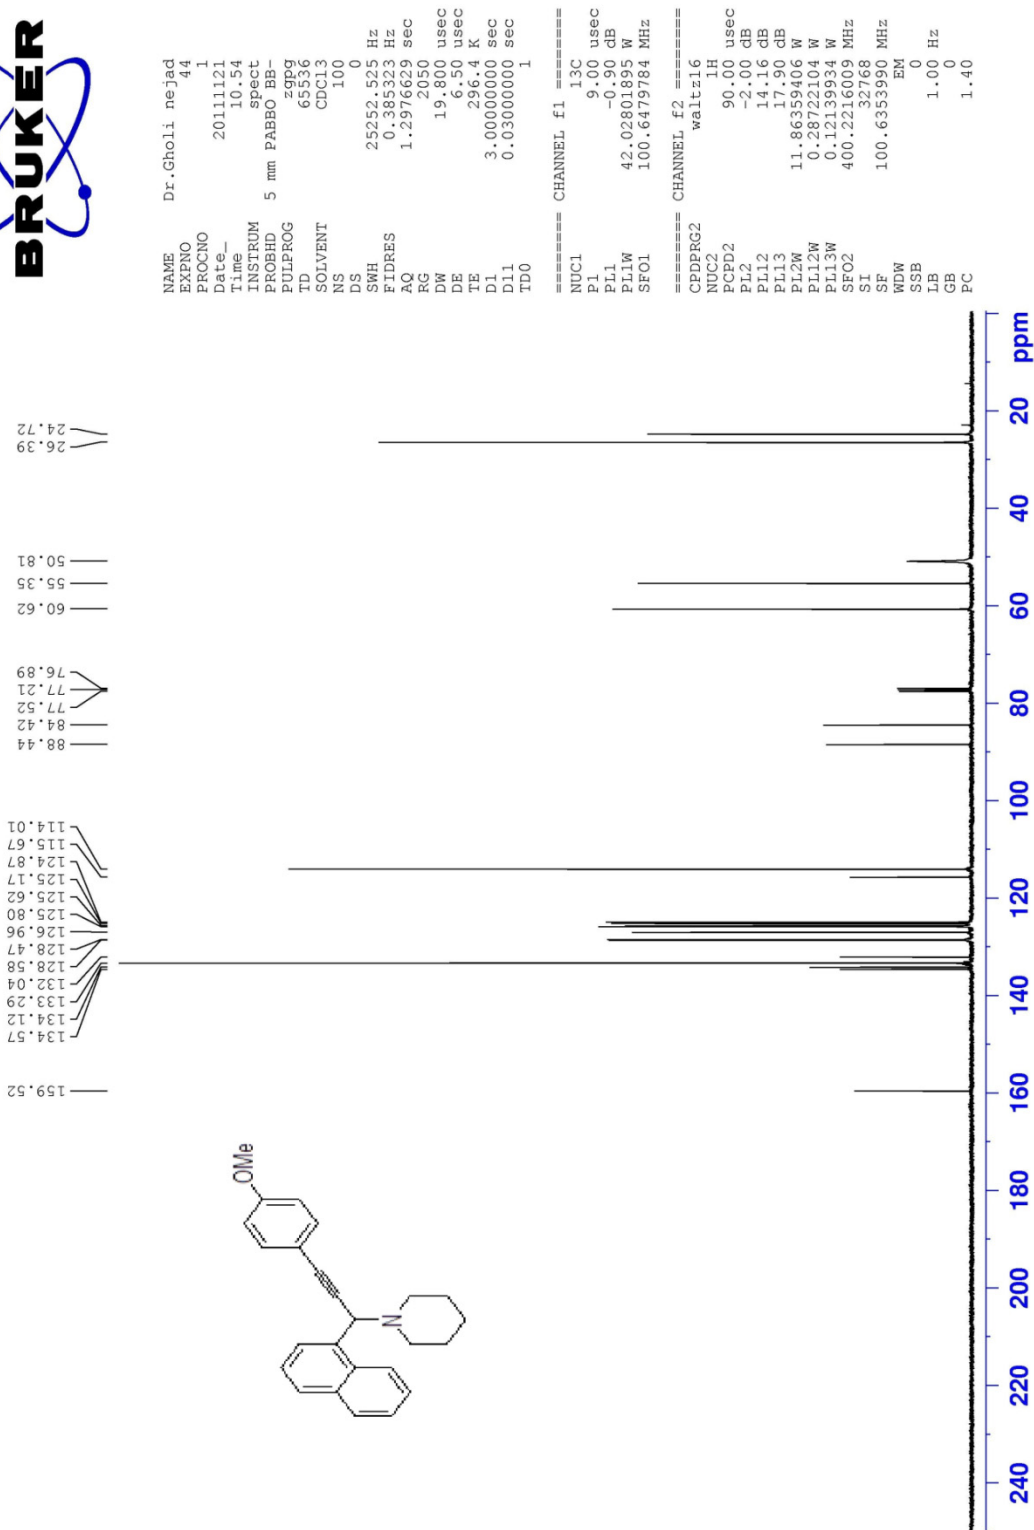

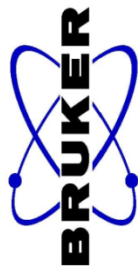

Dr.Gholi nejad  
NAME  
EXPNO 41  
PROCNO 1  
Date\_ 20111119  
Time 14.06  
INSTRUM spect  
PROBHD 5 mm PABBO BB-  
PULPROG zg30  
TD 65536  
SOLVENT CDC13  
NS 24  
DS 0  
SWH 8012.820 Hz  
FIDRES 0.122266 Hz  
AQ 4.0894966 sec  
RG 28.5  
DW 62.400 usec  
DE 6.50 usec  
TE 296.3 K  
D1 6.0000000 sec  
TD0 1  
===== CHANNEL f1 =====  
NUC1 1H  
P1 14.00 usec  
PL1 -2.00 dB  
PL1W 11.86359406 W  
SF01 400.2236020 MHz  
SI 32768  
SF 400.2200000 MHz  
WDW EM  
SSB 0  
LB 0.30 Hz  
GB 0  
PC 1.00

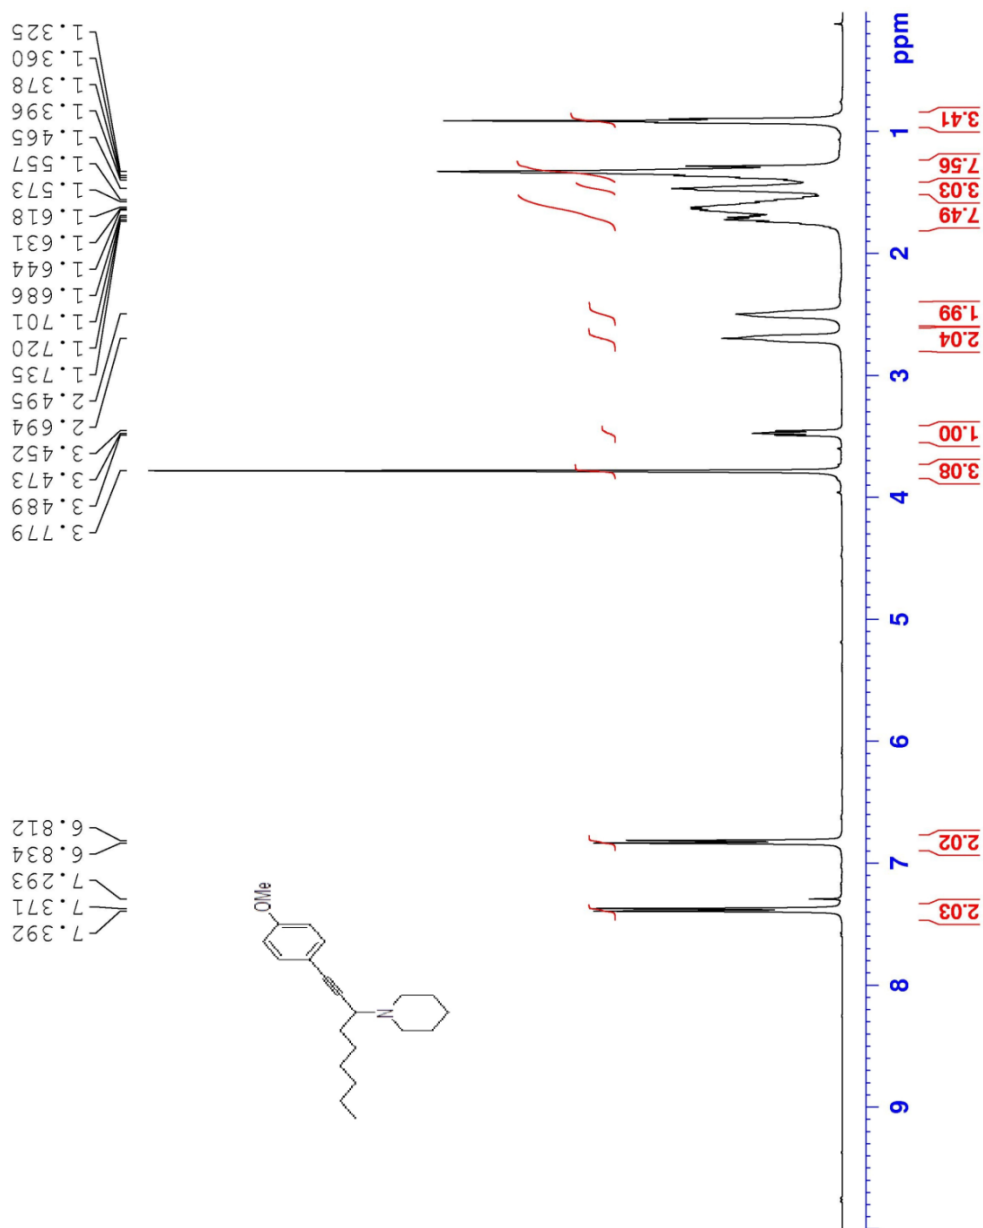

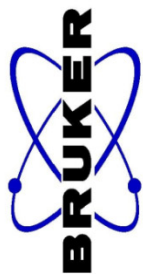

NAME Dr.Gholi nejad  
EXPNO 40  
PROCNO 1  
Date\_ 20111119  
Time 14.08  
INSTRUM spect  
PROBHD 5 mm FAPBO BB-  
PULPROG zgpg  
TD 65536  
SOLVENT CDCl3  
NS 41  
DS 0  
SWH 25252.525 Hz  
FIDRES 0.365323 Hz  
AQ 1.2976629 sec  
RG 2050  
DW 19.800 usec  
DE 6.50 usec  
TE 296.6 K  
D1 3.00000000 sec  
D11 0.03000000 sec  
TD0 1

==== CHANNEL f1 =====  
NUC1 13C  
P1 9.00 usec  
PL1 -0.90 dB  
PL1W 42.02801895 W  
SF01 100.6479784 MHz

==== CHANNEL f2 =====  
CPDPRG2 waltz16  
NUC2 1H  
PCPD2 90.00 usec  
PL2 -2.00 dB  
PL12 14.16 dB  
PL13 17.90 dB  
PL2W 11.86359406 W  
PL12W 0.28722104 W  
PL13W 0.12139834 W  
SFO2 400.2216009 MHz  
SI 32768  
SF 100.6353990 MHz  
WDW EM  
SSB 0  
LB 1.00 Hz  
GB 0  
PC 1.40

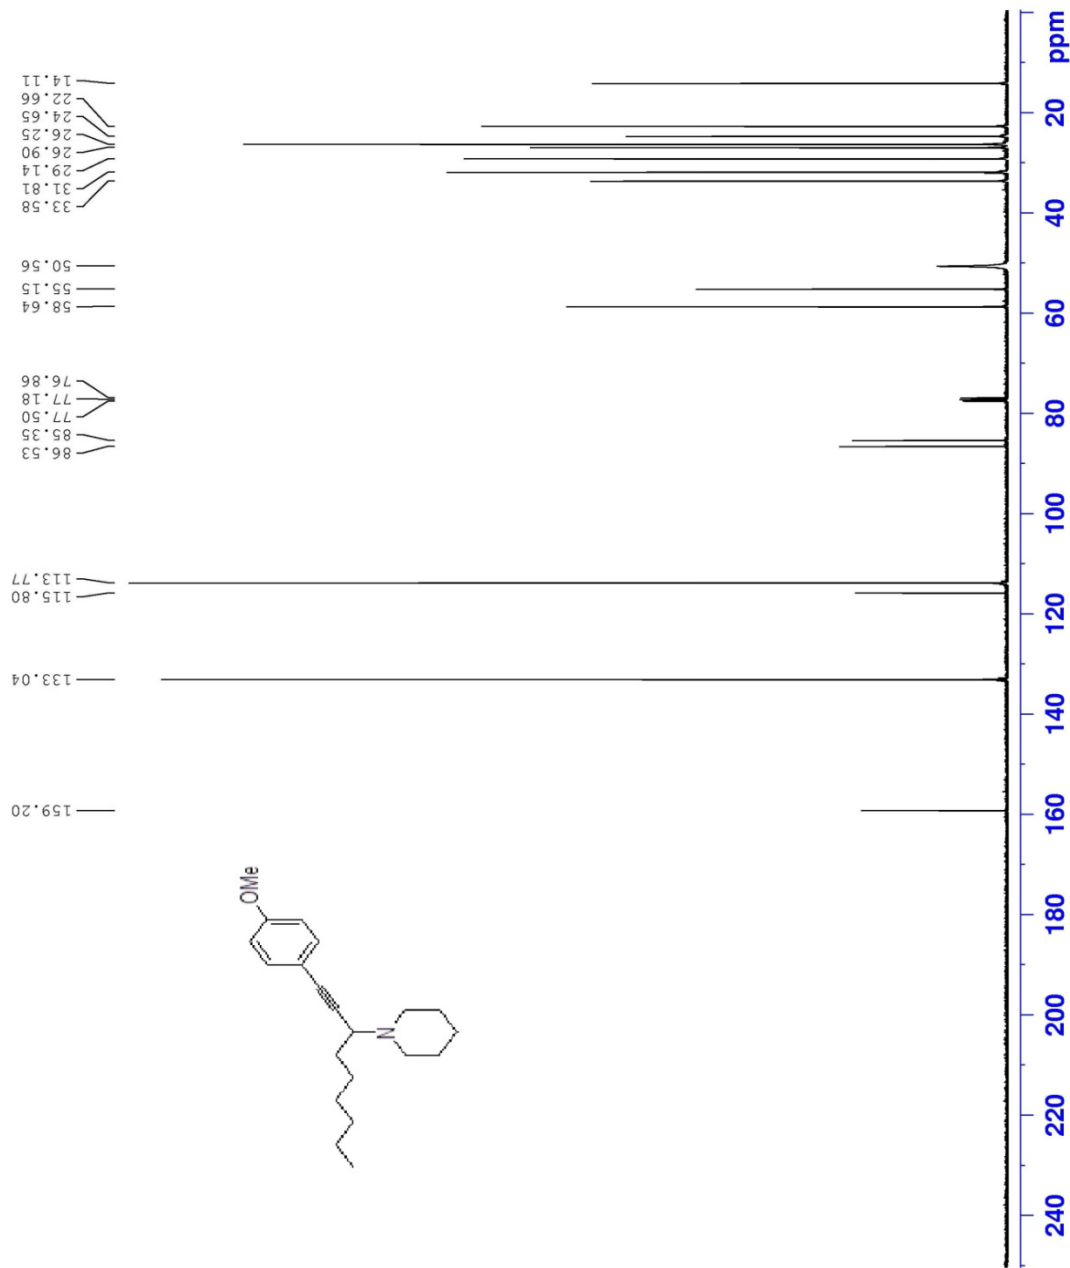

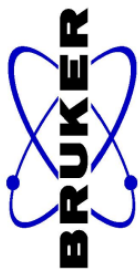

Dr. Gholi nejad  
NAME  
EXPNO 78  
PROCNO 1  
Date\_ 20120102  
Time\_ 14.45  
INSTRUM spect  
PROBHD 5 mm PABEO BB-  
PULPROG zg30  
TD 65536  
SOLVENT CDCl3  
NS 11  
DS 0  
SWH 8012.820 Hz  
FIDRES 0.122266 Hz  
AQ 4.0894966 sec  
RG 406  
DM 62.400 usec  
DE 6.50 usec  
TE 297.0 K  
D1 6.0000000 sec  
TD0 1  
===== CHANNEL f1 =====  
NUC1 1H  
P1 14.00 usec  
PL1 -2.00 dB  
PL1W 11.86359406 W  
SFO1 400.2236020 MHz  
SI 32768  
SF 400.2200000 MHz  
WDW EM  
SSB 0  
LB 0.30 Hz  
GB 0  
PC 1.00

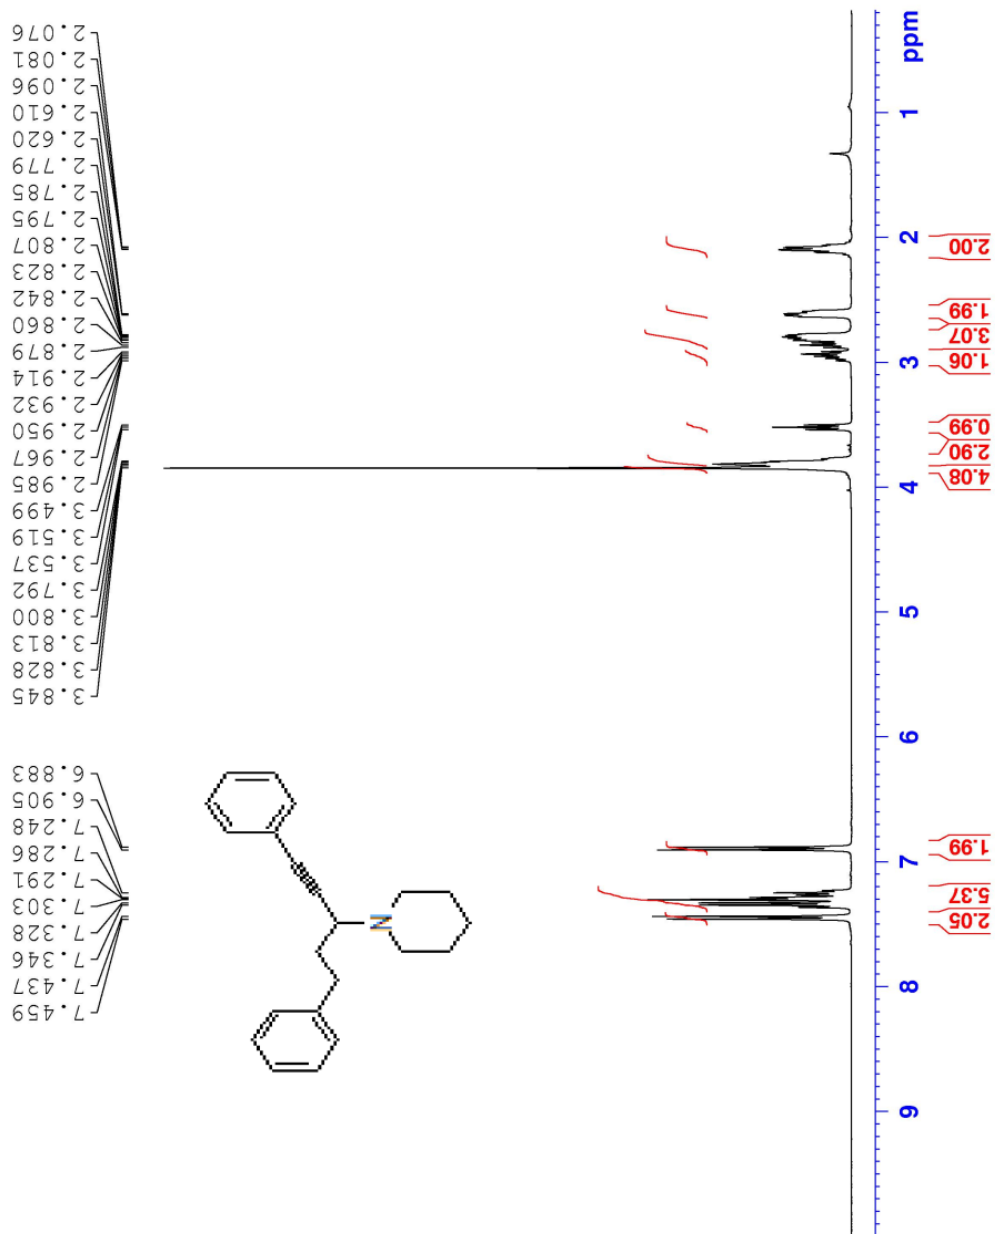

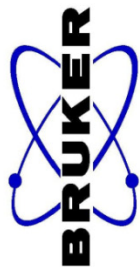

NAME Dr.Gholi.nejad  
EXPNO 79  
PROCNO 1  
Date\_ 20120102  
Time\_ 14.47  
INSTRUM spect  
PROBHD 5 mm PABBO BB-  
PULPROG zgpg  
TD 65536  
SOLVENT CDC13  
NS 30  
DS 0  
SWH 25252.525 Hz  
FIDRES 0.385323 Hz  
AQ 1.2976629 sec  
RG 2050  
DW 19.800 usec  
DE 6.50 usec  
TE 297.2 K  
D1 3.0000000 sec  
D11 0.0300000 sec  
TD0 1

===== CHANNEL f1 =====  
NUC1 13C  
P1 9.00 usec  
PL1 -0.90 dB  
PL1W 42.02801895 W  
SFO1 100.6479784 MHz

===== CHANNEL f2 =====  
CPDPRG2 waltz16  
NUC2 1H  
PCPD2 90.00 usec  
PL2 -2.00 dB  
PL12 14.16 dB  
PL13 17.50 dB  
PL2W 11.86359406 W  
PL12W 0.28722104 W  
PL13W 0.12139934 W  
SFO2 400.2216009 MHz  
SI 32768  
SF 100.6353990 MHz  
WDW EM  
SSB 0  
LB 1.00 Hz  
GB 0  
PC 1.40

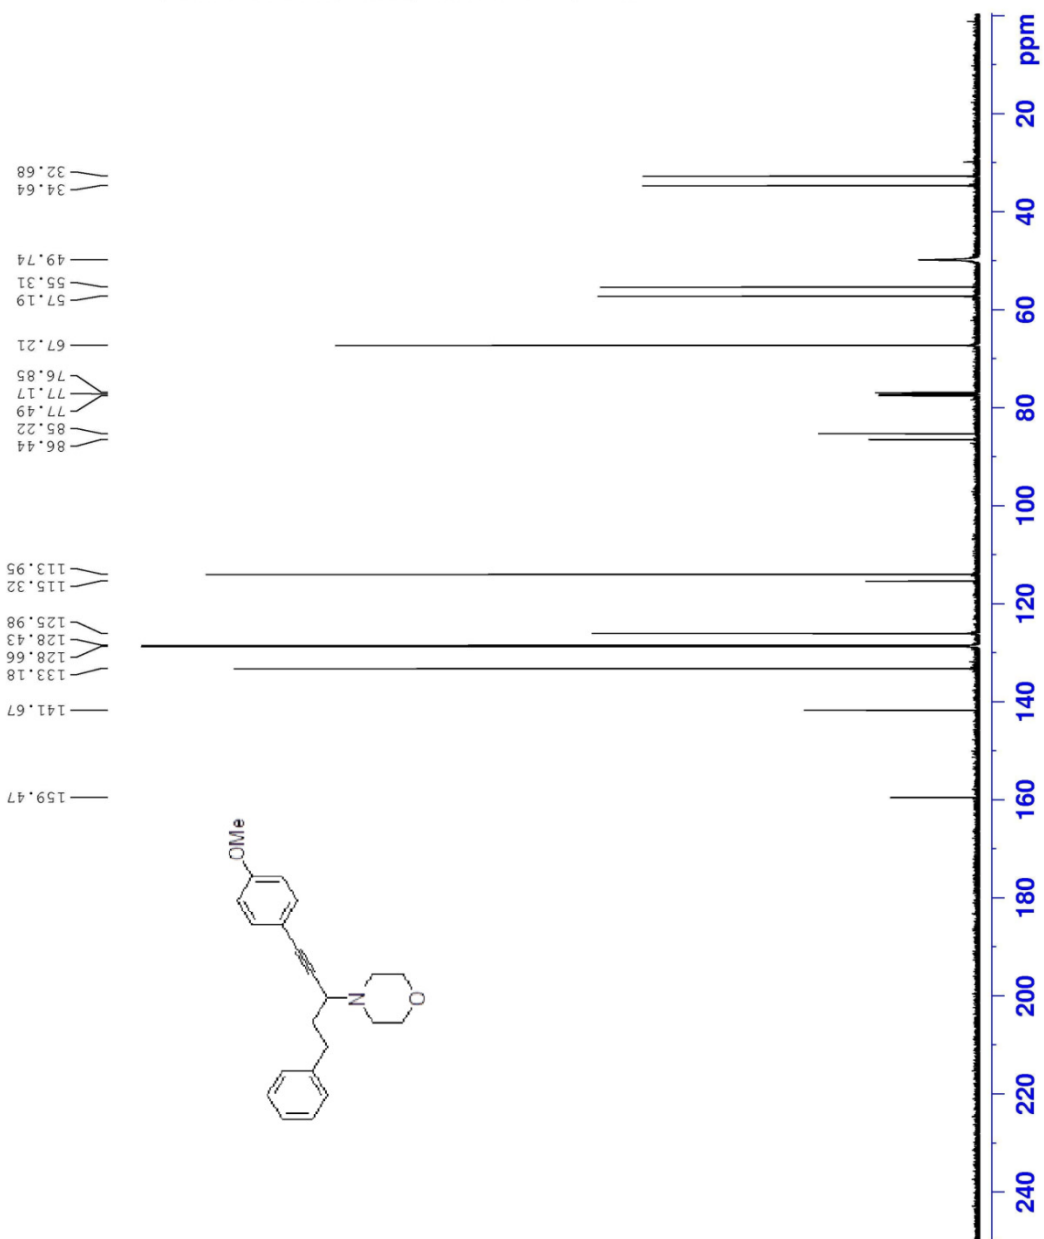

Supplement: c2cc33320a.pdf [file c2cc33320a.pdf]
